# Supplementary material
Source: PubMed Central journal article supplement (PMC4256782)
Supplement: supp_114.169367_169367SI.pdf [file supp_114.169367_169367SI.pdf]

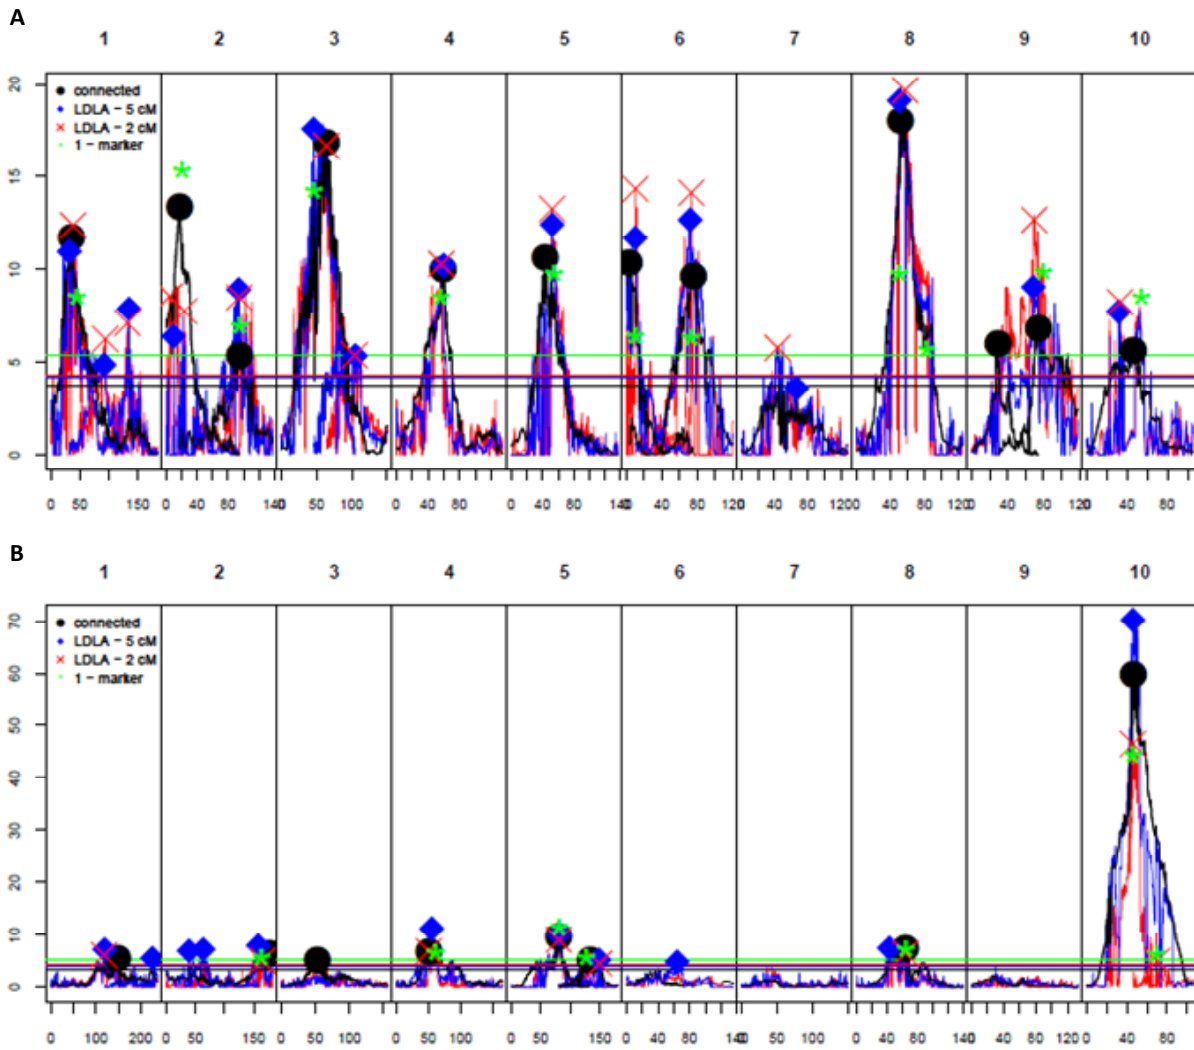

**Figure S1** Results of the QTL detection with each model for DMC for **(A)** the dent design and **(B)** the flint design. The  $-\log_{10}(p\text{-values})$  of the connected model are represented by black lines, the QTL positions of the connected models by black dots. The  $-\log_{10}(p\text{-values})$  of the LDLA – 5 cM model are represented by blue lines and the QTL positions by blue diamonds. The  $-\log_{10}(p\text{-values})$  of the LDLA – 2 cM model are represented by red lines and the QTL positions by red crosses. The  $-\log_{10}(p\text{-values})$  of the QTL detected by the LDLA – 1-marker model are represented by green stars. Horizontal lines correspond to the threshold values of the different models.

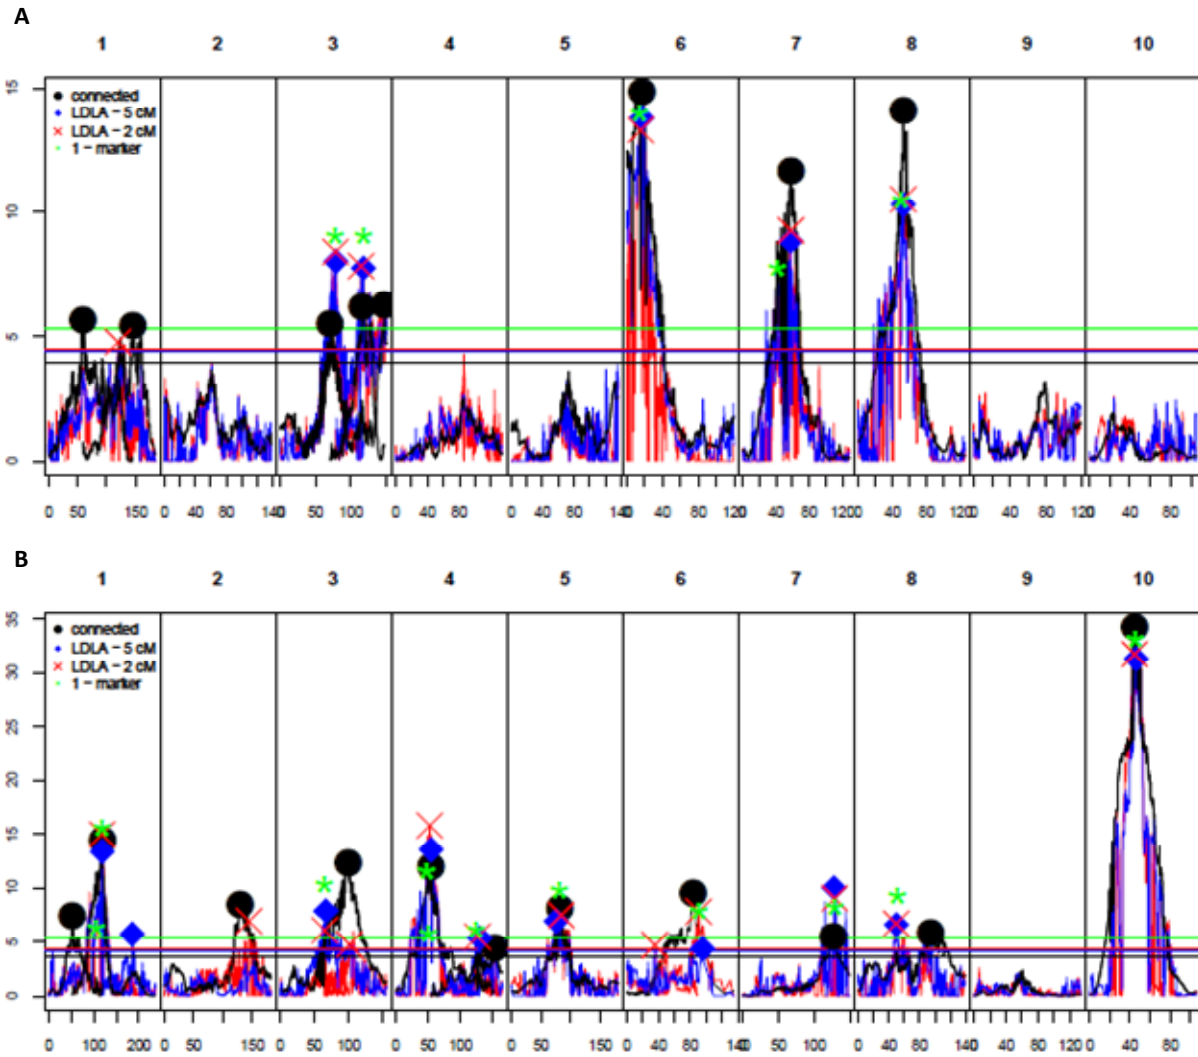

**Figure S2** Results of the QTL detection with each model for DMY for **(A)** the dent design and **(B)** the flint design. The results for the dent design are in the superior part, flint in the inferior part. The  $-\log_{10}(p\text{-values})$  of the connected model are represented by black lines, the QTL positions of the connected models by black dots. The  $-\log_{10}(p\text{-values})$  of the LDLA – 5 cM model are represented by blue lines and the QTL positions by blue diamonds. The  $-\log_{10}(p\text{-values})$  of the LDLA – 2 cM model are represented by red lines and the QTL positions by red crosses. The  $-\log_{10}(p\text{-values})$  of the QTL detected by the LDLA – 1-marker model are represented by green stars. Horizontal lines correspond to the threshold values of the different models.

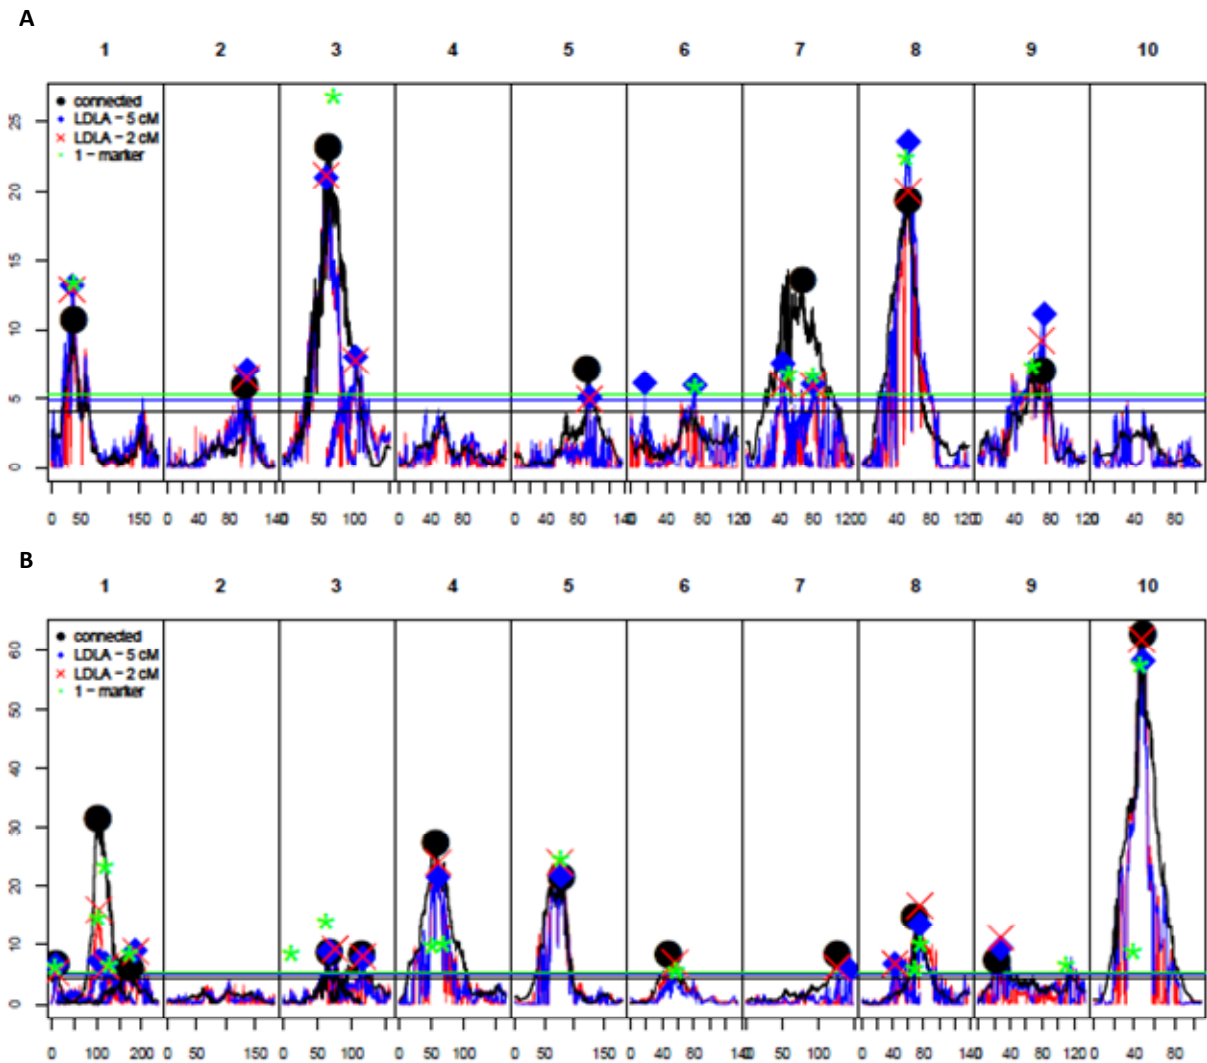

**Figure S3** Results of the QTL detection with each model for DtTAS for **(A)** the dent design and **(B)** the flint design. The  $-\log_{10}(p\text{-values})$  of the connected model are represented by black lines, the QTL positions of the connected models by black dots. The  $-\log_{10}(p\text{-values})$  of the LDLA - 5 cM model are represented by blue lines and the QTL positions by blue diamonds. The  $-\log_{10}(p\text{-values})$  of the LDLA - 2 cM model are represented by red lines and the QTL positions by red crosses. The  $-\log_{10}(p\text{-values})$  of the QTL detected by the LDLA - 1-marker model are represented by green stars. Horizontal lines correspond to the threshold values of the different models.

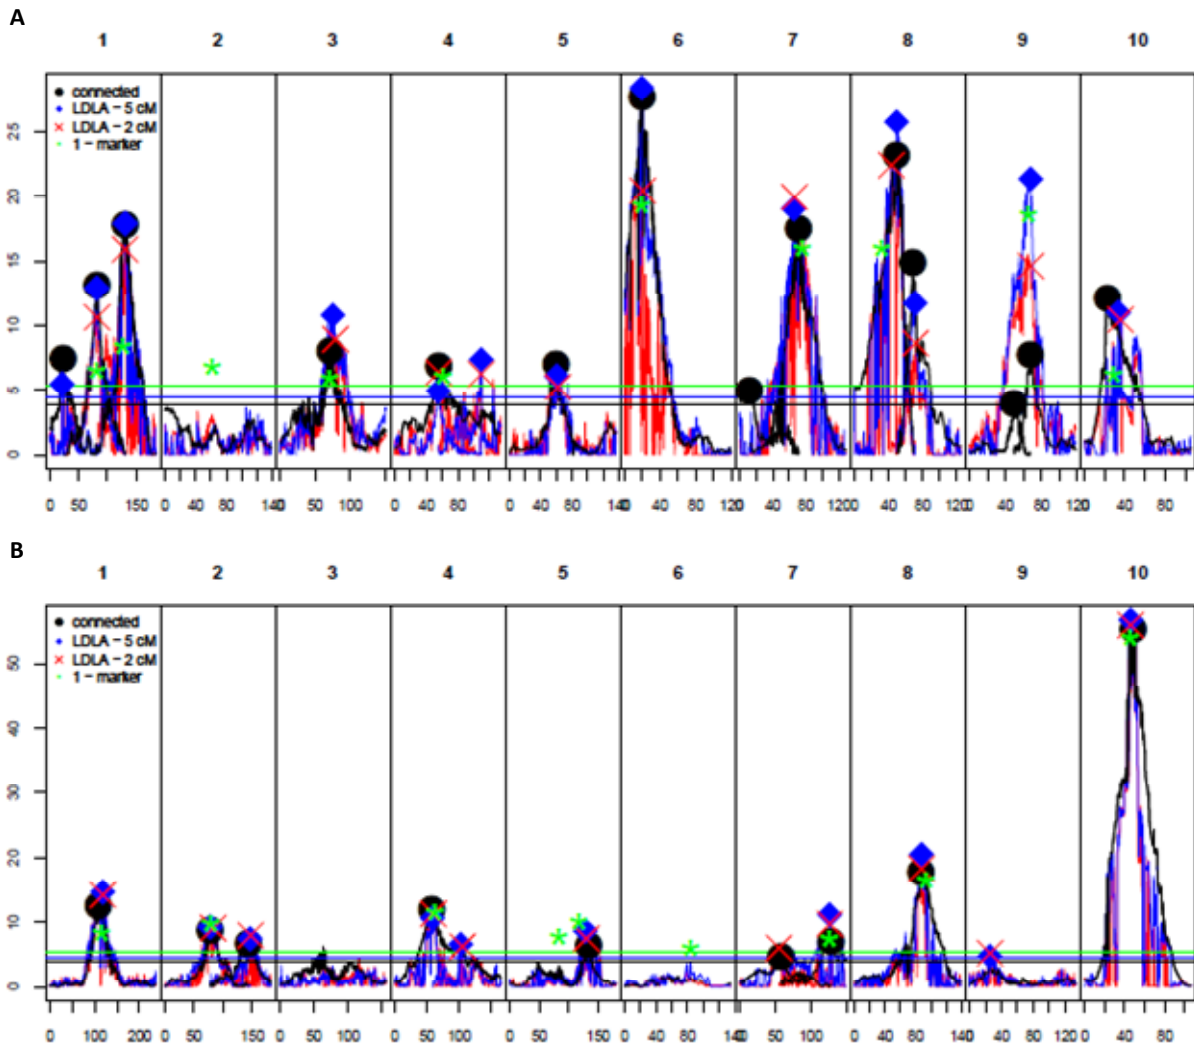

**Figure S4** Results of the QTL detection with each model for PH for **(A)** the dent design and **(B)** the flint design. The  $-\log_{10}(p\text{-values})$  of the connected model are represented by black lines, the QTL positions of the connected models by black dots. The  $-\log_{10}(p\text{-values})$  of the LDLA – 5 cM model are represented by blue lines and the QTL positions by blue diamonds. The  $-\log_{10}(p\text{-values})$  of the LDLA – 2 cM model are represented by red lines and the QTL positions by red crosses. The  $-\log_{10}(p\text{-values})$  of the QTL detected by the LDLA – 1-marker model are represented by green stars. Horizontal lines correspond to the threshold values of the different models.

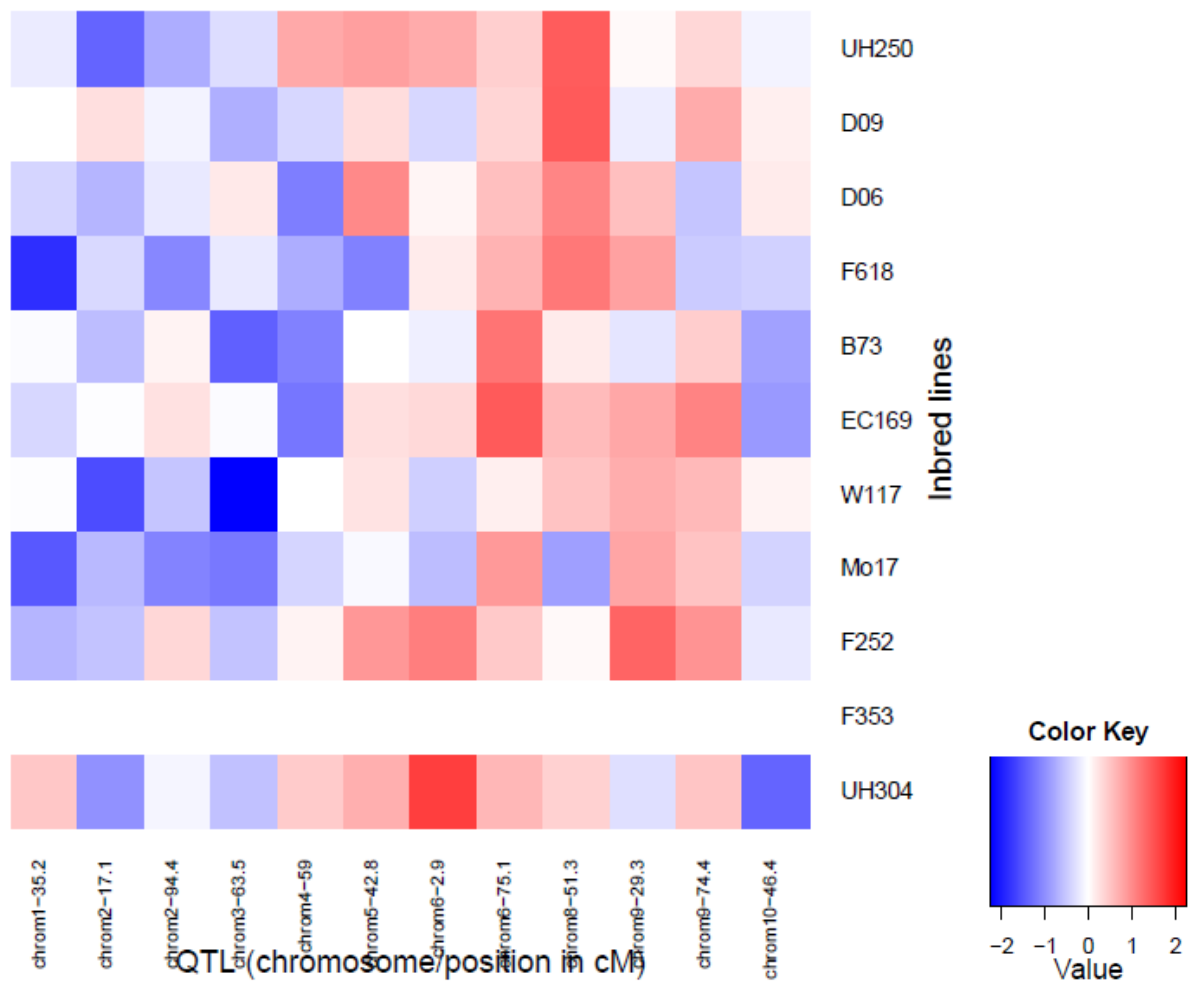

**Figure S5** Allelic effects for the different dent lines for the QTL detected for DMC with the connected model. Allelic effects are estimated in contrast to the central line allelic effect (F353), which was set to zero.

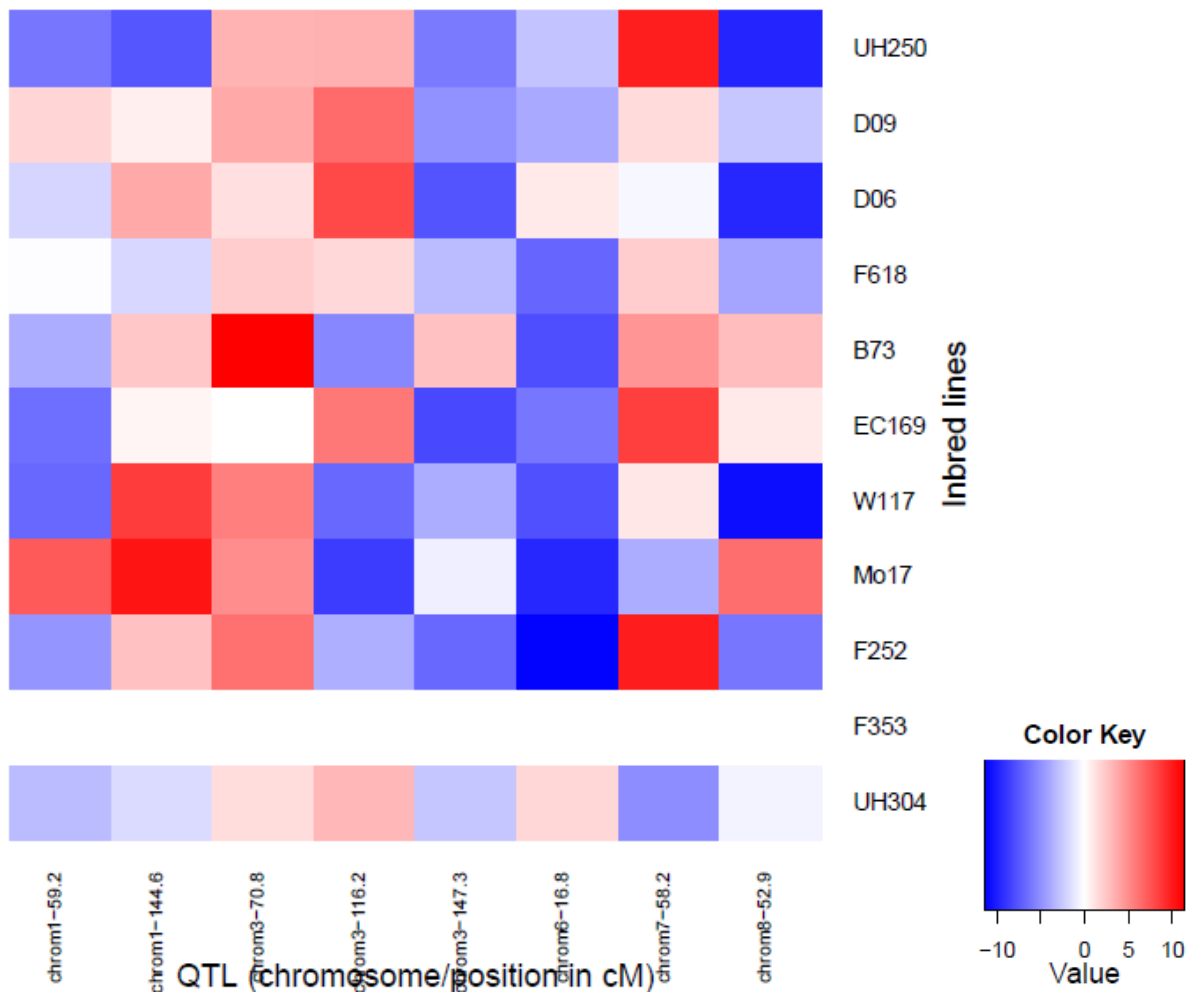

**Figure S6** Allelic effects for the different dent lines for the QTL detected for DMY with the connected model. Allelic effects are estimated in contrast to the central line allelic effect (F353), which was set to zero.

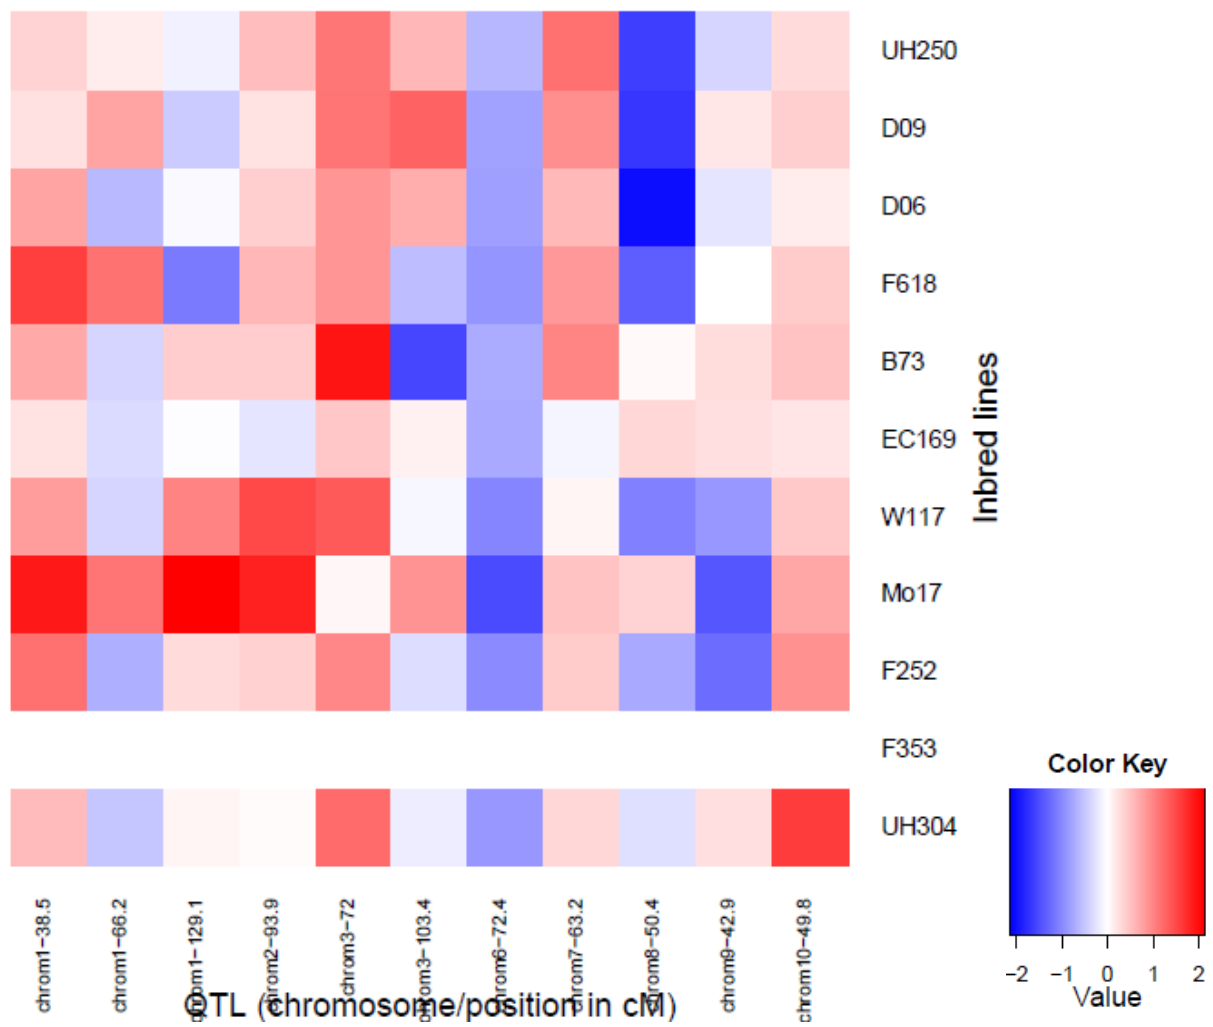

**Figure S7** Allelic effects for the different dent lines for the QTL detected for DtSILK with the connected model. Allelic effects are estimated in contrast to the central line allelic effect (F353), which was set to zero.

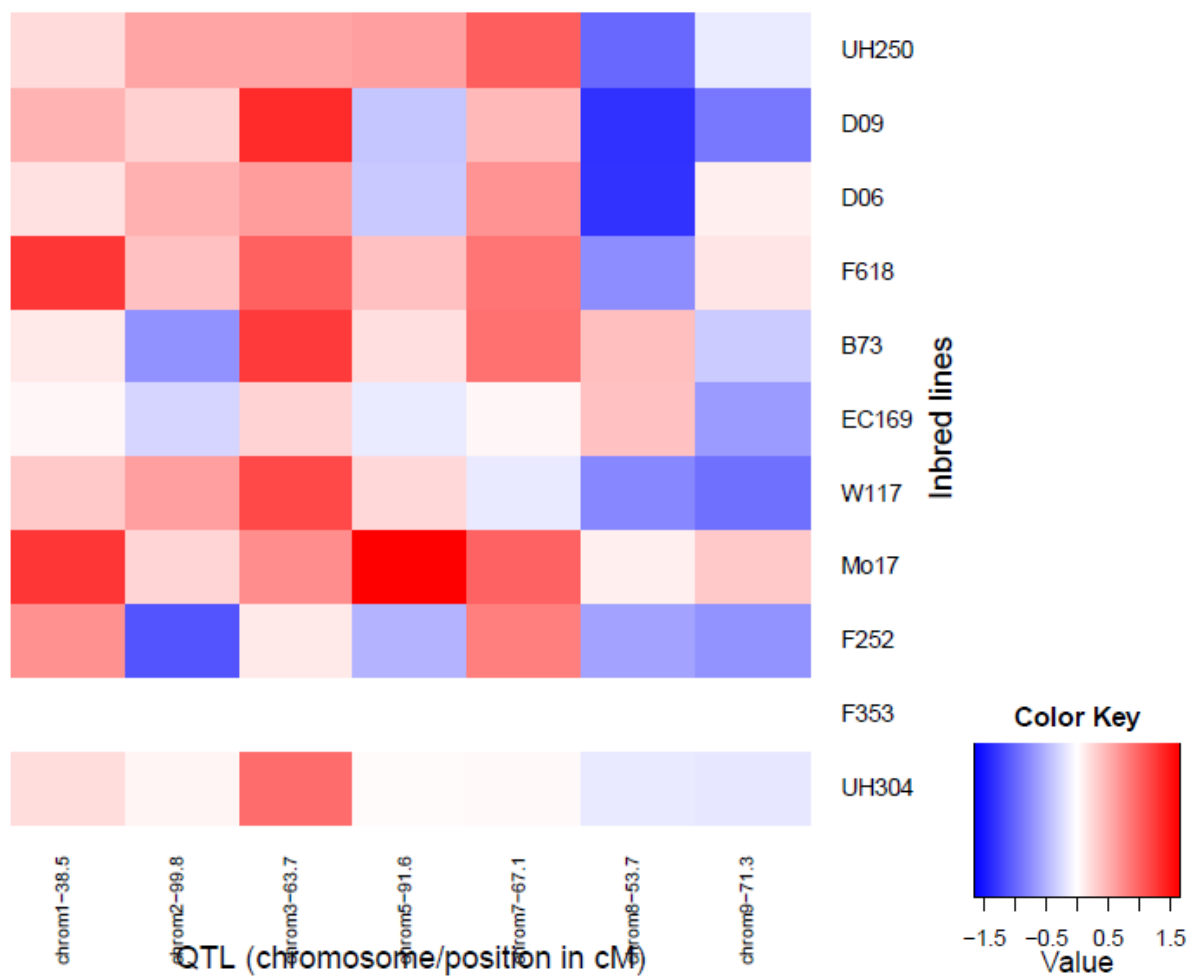

**Figure S8** Allelic effects for the different dent lines for the QTL detected for DtTAS with the connected model. Allelic effects are estimated in contrast to the central line allelic effect (F353), which was set to zero.



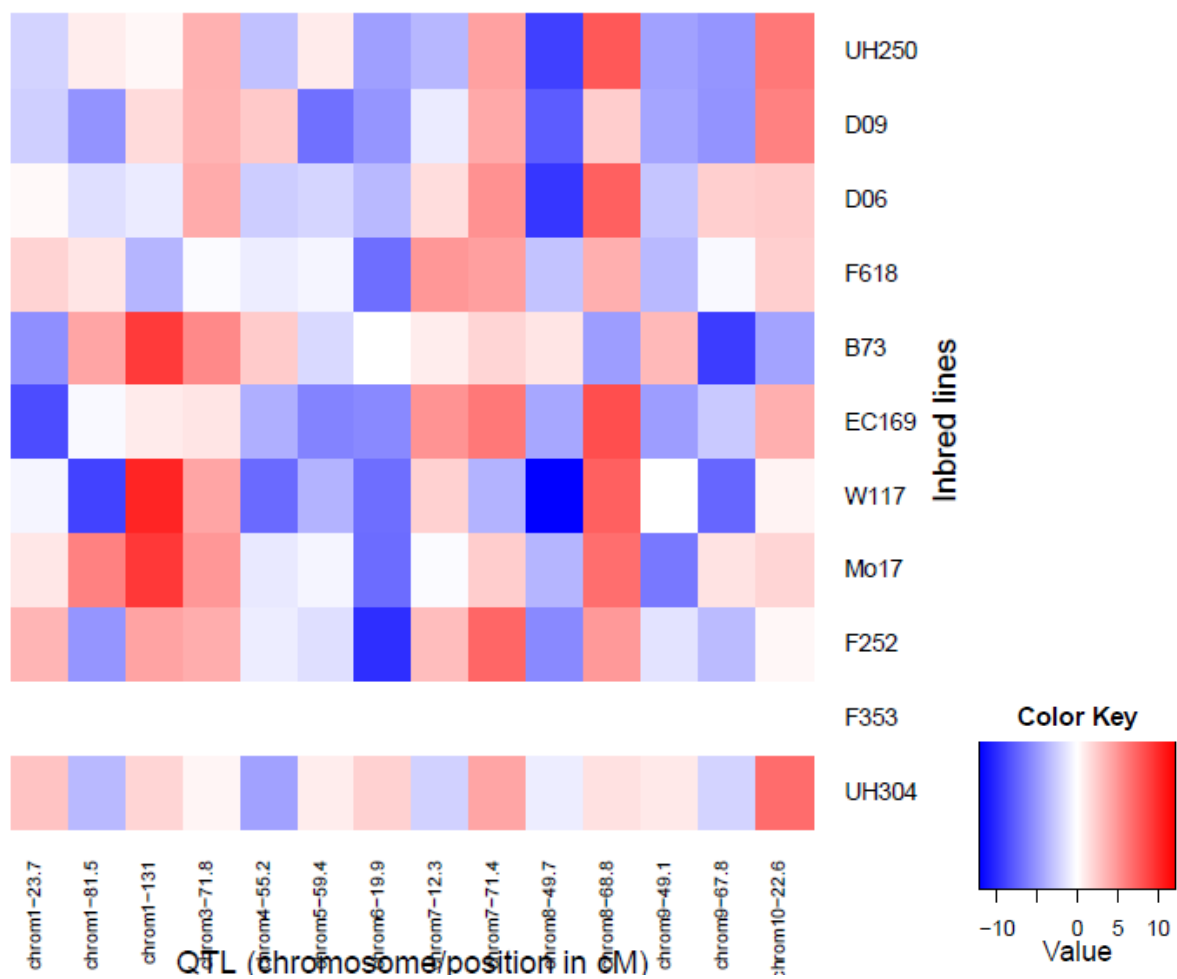

**Figure S9** Allelic effects for the different dent lines for the QTL detected for PH with the connected model. Allelic effects are estimated in contrast to the central line allelic effect (F353), which was set to zero.

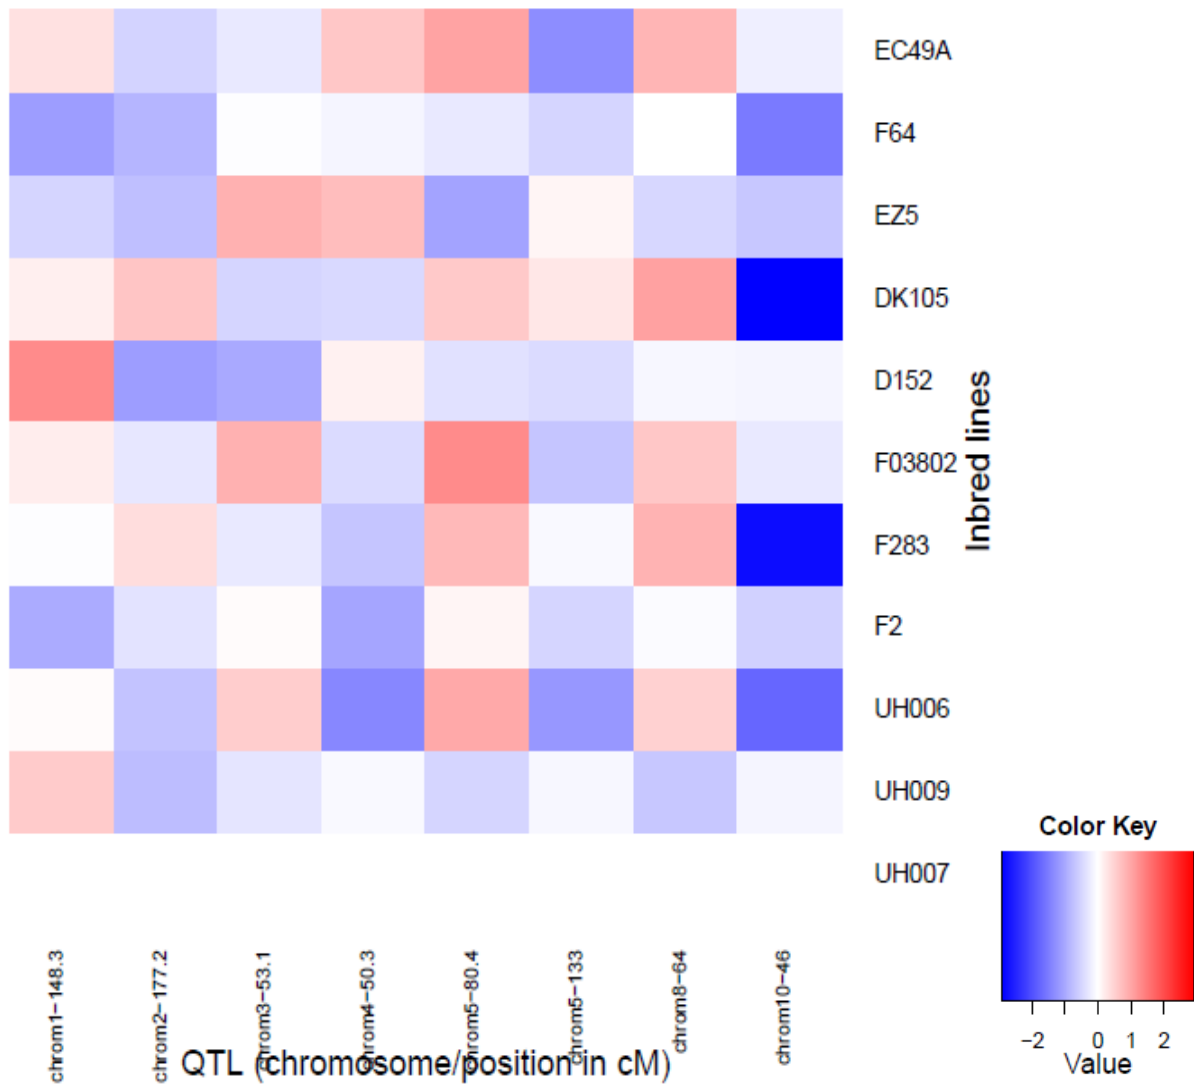

**Figure S10** Allelic effects for the different flint lines for the QTL detected for DMC with the connected model. Allelic effects are estimated in contrast to the central line allelic effect (F353), which was set to zero. Allelic effects estimated for EP44 were not shown because the population where it segregates was too small (17 individuals) to obtain a reliable estimation.

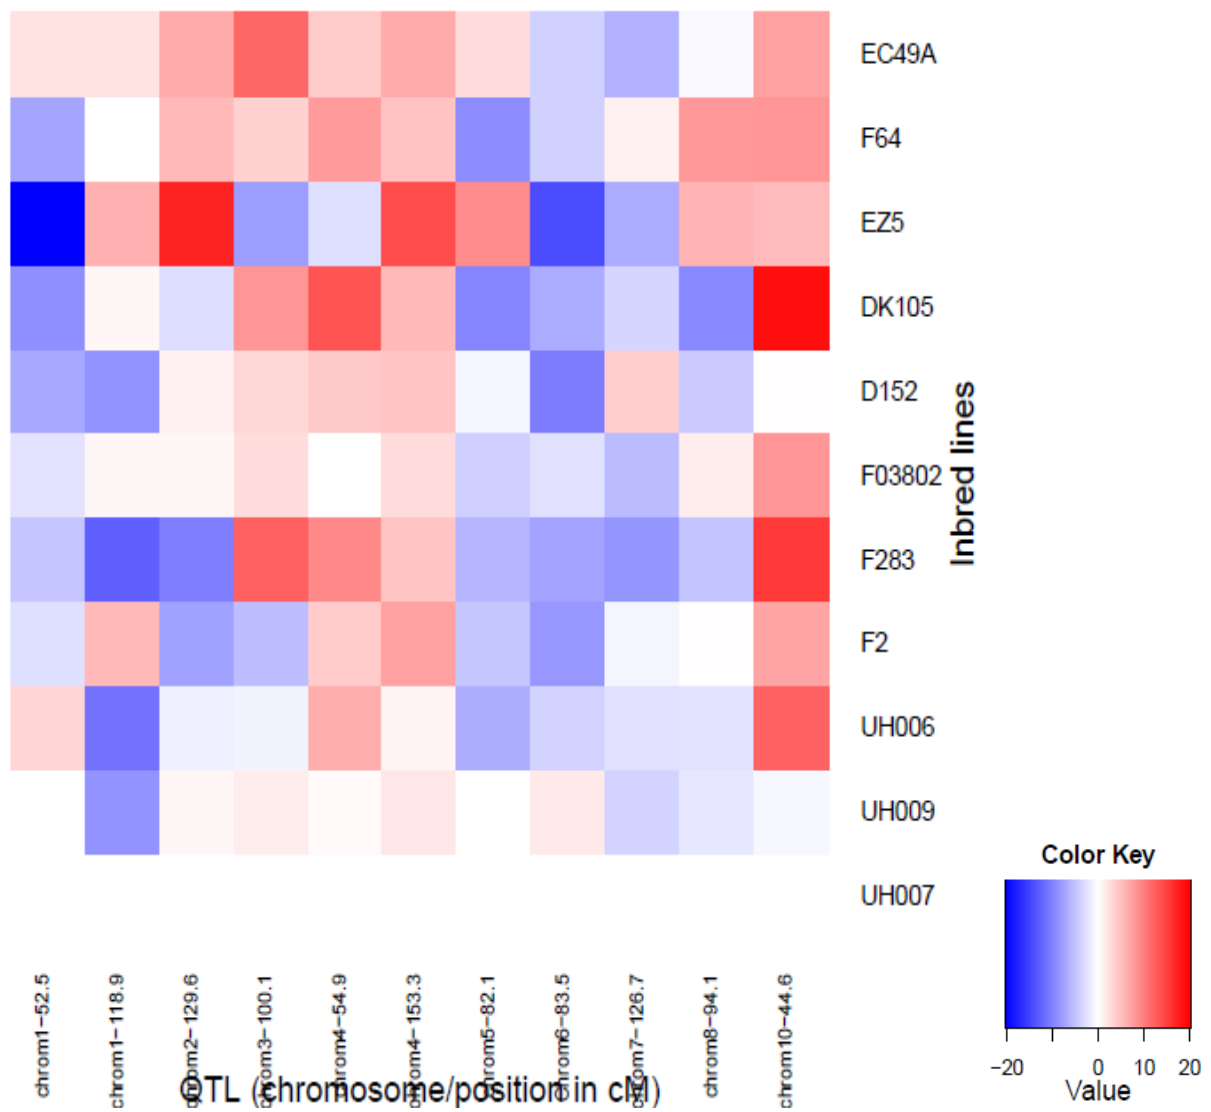

**Figure S11** Allelic effects for the different flint lines for the QTL detected for DMY with the connected model. Allelic effects are estimated in contrast to the central line allelic effect (F353), which was set to zero. Allelic effects estimated for EP44 were not shown because the population where it segregates was too small (17 individuals) to obtain a reliable estimation.

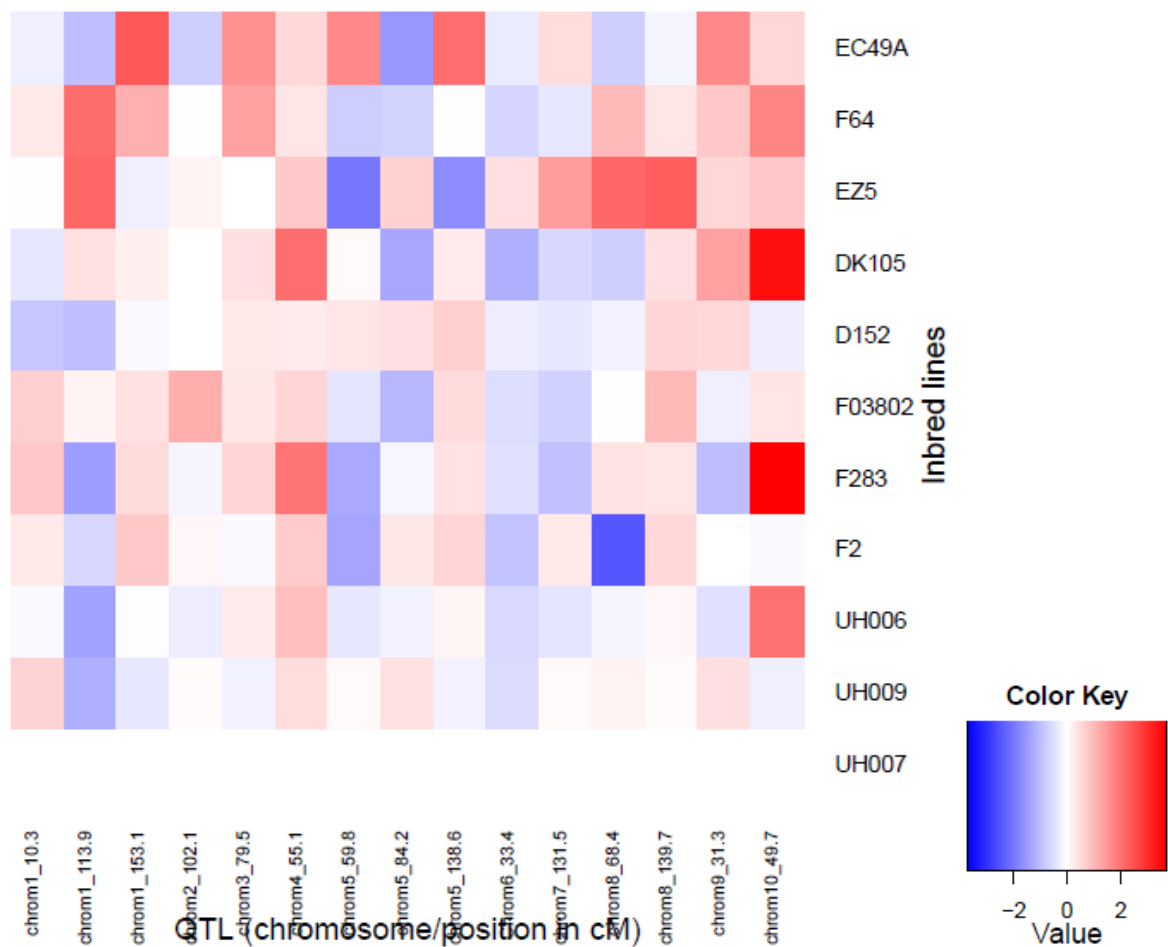

**Figure S12** Allelic effects for the different flint lines for the QTL detected for DtsILK with the connected model. Allelic effects are estimated in contrast to the central line allelic effect (F353), which was set to zero. Allelic effects estimated for EP44 were not shown because the population where it segregates was too small (17 individuals) to obtain a reliable estimation.

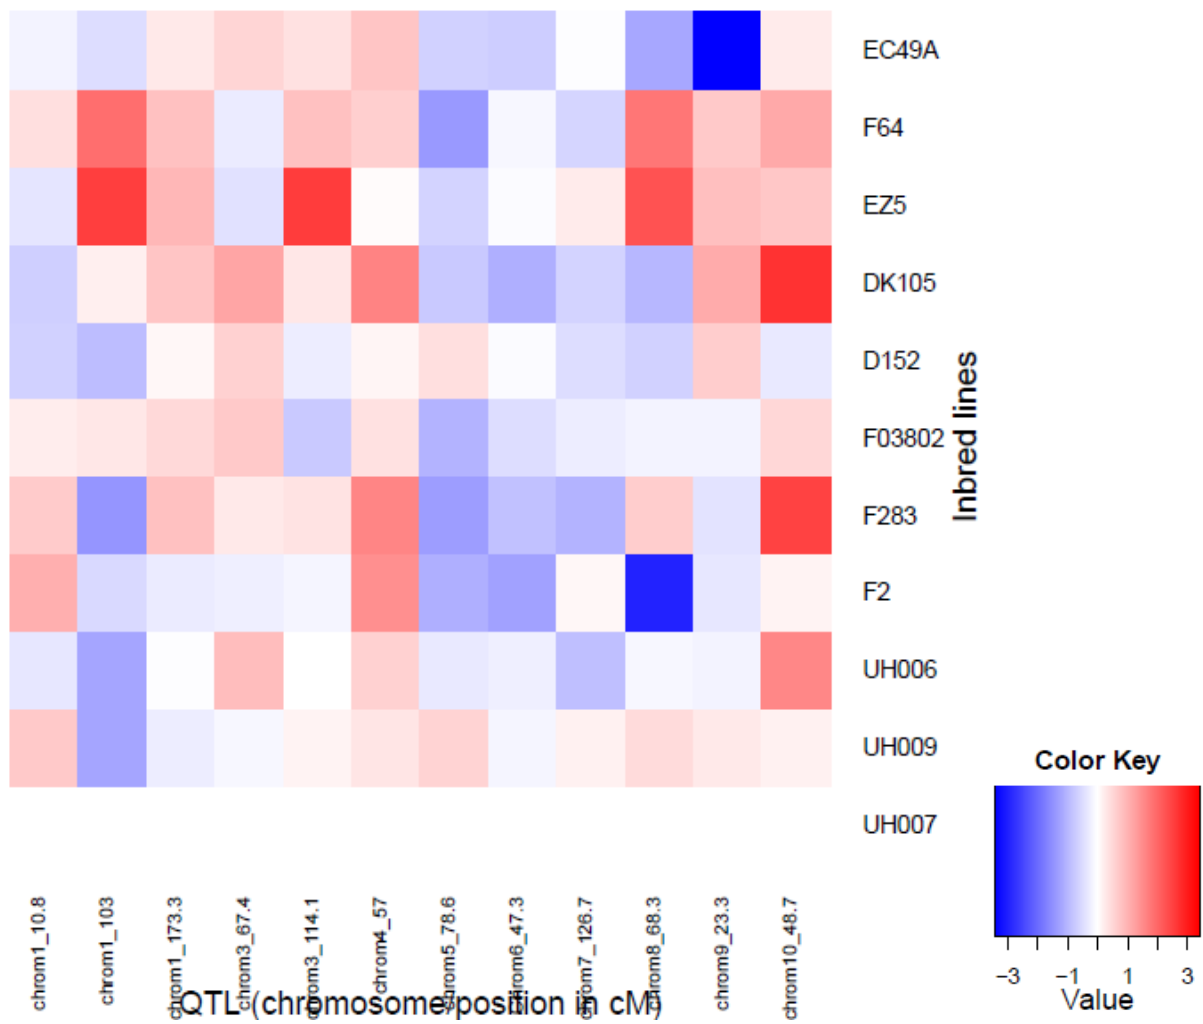

**Figure S13** Allelic effects for the different flint lines for the QTL detected for DtTAS with the connected model. Allelic effects are estimated in contrast to the central line allelic effect (F353), which was set to zero. Allelic effects estimated for EP44 were not shown because the population where it segregates was too small (17 individuals) to obtain a reliable estimation.

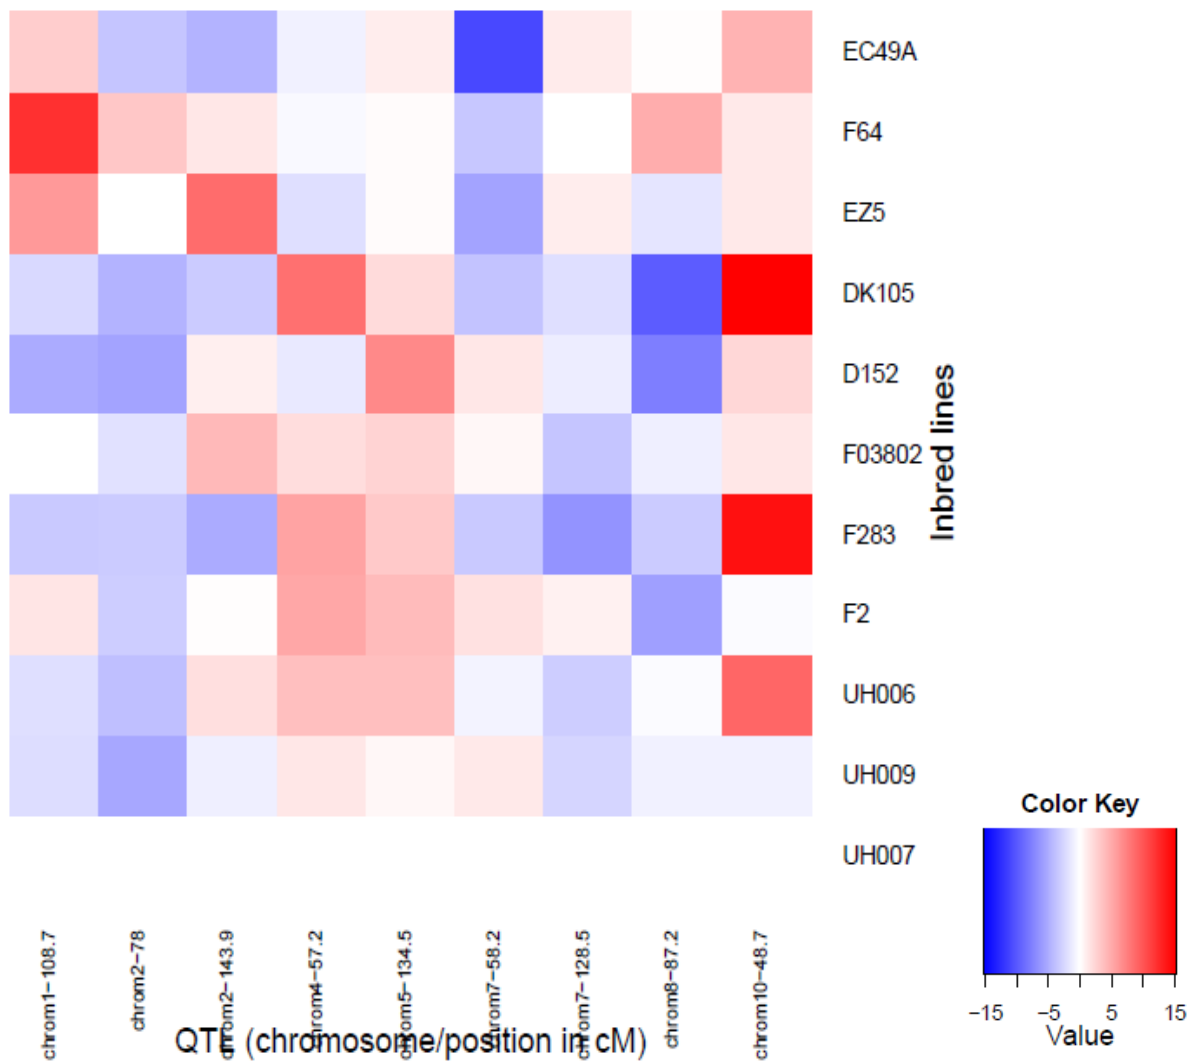

**Figure S14** Allelic effects for the different flint lines for the QTL detected for PH with the connected model. Allelic effects are estimated in contrast to the central line allelic effect (F353), which was set to zero. Allelic effects estimated for EP44 were not shown because the population where it segregates was too small (17 individuals) to obtain a reliable estimation.

**Table S1** Composition of the dent and flint designs with the number of DH lines in each family which were used for obtaining the consensus maps and the one which were phenotyped.

| <b>Dent design</b> |                 |                  | <b>Flint design</b> |                 |                  |
|--------------------|-----------------|------------------|---------------------|-----------------|------------------|
| Central line F353  |                 |                  | Central line UH007  |                 |                  |
| Founder            | Genotyped lines | Phenotyped lines | Founder             | Genotyped lines | Phenotyped lines |
| B73                | 73              | 64               | D152                | 112             | 72               |
| D06                | 103             | 99               | EC49A               | 53              | 29               |
| D09                | 105             | 100              | EP44                | 34 <sup>a</sup> | 17               |
| EC169              | 77              | 66               | EZ5                 | 50              | 26               |
| F252               | 105             | 96               | F03802              | 129             | 129              |
| F618               | 108             | 104              | F2                  | 77              | 54               |
| Mo17               | 63              | 53               | F283                | 134             | 133              |
| UH250              | 99              | 94               | F64                 | 108             | 64               |
| UH304              | 86              | 81               | UH006               | 114             | 94               |
| W117               | 100             | 84               | UH009               | 117             | 98               |
|                    |                 |                  | DK105               | 115             | 95               |
| <b>Total</b>       | <b>919</b>      | <b>841</b>       | <b>Total</b>        | <b>1009</b>     | <b>811</b>       |

<sup>a</sup> Population not used for mapping as too small

**Table S2** Threshold values for the  $-\log(p\text{-value})$  for all the models and traits for the dent and flint groups and for the joint connected study.

|                              | DMC  | DMY  | DtSILK | DtTAS | PH   | Mean        |
|------------------------------|------|------|--------|-------|------|-------------|
| Dent                         |      |      |        |       |      |             |
| Connected                    | 3.71 | 3.91 | 3.88   | 4.11  | 3.83 | <b>3.89</b> |
| LDLA - 5cM                   | 4.18 | 4.38 | 4.62   | 4.87  | 4.42 | <b>4.49</b> |
| LDLA - 2cM                   | 4.26 | 4.46 | 4.61   | 4.94  | 4.50 | <b>4.55</b> |
| LDLA – 1-marker <sup>a</sup> | 5.64 | 5.64 | 5.64   | 5.64  | 5.64 | <b>5.64</b> |
| Flint                        |      |      |        |       |      |             |
| Connected                    | 3.43 | 3.65 | 4.15   | 4.37  | 3.83 | <b>3.89</b> |
| LDLA - 5cM                   | 4.07 | 4.20 | 4.84   | 5.13  | 4.53 | <b>4.55</b> |
| LDLA - 2cM                   | 4.30 | 4.36 | 5.04   | 5.23  | 4.60 | <b>4.71</b> |
| LDLA – 1-marker <sup>a</sup> | 5.61 | 5.61 | 5.61   | 5.61  | 5.61 | <b>5.61</b> |
| Joint                        |      |      |        |       |      |             |
| Connected                    | 3.49 | 3.94 | 4.02   | 4.85  | 3.74 | <b>4.00</b> |

<sup>a</sup>The threshold value for the LDLA – 1-marker corresponded to a Bonferroni threshold for a genome-wide risk of 10 %. The other thresholds were calculated using 5,000 intra-family permutations of the phenotypes for a type I risk of 10 % across all families and the total genome.



**Table S3 Results of the QTL detection in the flint design using the connected model.** For each detected QTL, we showed its genetic position on the flint consensus map, its confidence interval, its level of significance and the partial percentage of variance explained. We also showed the name of one of the markers located at the detected position and their range of physical position(s) on the B73 v2 genome (Gore et al. 2009).

| Trait      | Nb | Chr | Marker        | Physical position (kb) | Genetic position (cM) | Confidence interval | -log10(p) | R <sup>2</sup> (%) |
|------------|----|-----|---------------|------------------------|-----------------------|---------------------|-----------|--------------------|
| DMC (%)    | 1  | 1   | PZE_101172677 | 216581                 | 148.3                 | 142-149             | 5.4       | 3.2                |
|            | 2  | 2   | PZE_102191415 | 234096                 | 177.2                 | 176-181             | 6.6       | 3.6                |
|            | 3  | 3   | PZE_103033917 | 26445 - 138643         | 53.1                  | 53-58               | 5.1       | 3                  |
|            | 4  | 4   | PZE_104021549 | 18916 - 23142          | 50.3                  | 49-55               | 6.7       | 3.7                |
|            | 5  | 5   | PZE_105085637 | 107137 - 138073        | 80.4                  | 79-84               | 9.8       | 4.9                |
|            | 6  | 5   | PZE_105150268 | 201762                 | 133                   | 129-138             | 5.3       | 3.1                |
|            | 7  | 8   | PZE_108060399 | 107884 - 113068        | 64                    | 50-65               | 7.4       | 4                  |
|            | 8  | 10  | PZE_110049849 | 93025 - 115573         | 46                    | 46-49               | 59.6      | 26.5               |
| <b>DMY</b> |    |     |               |                        |                       |                     |           |                    |
| (dt.ha-1)  | 1  | 1   | PZE_101038989 | 25879 - 26917          | 52.5                  | 52-54               | 7.4       | 3.8                |
|            | 2  | 1   | PZE_101147651 | 191513                 | 118.9                 | 117-120             | 14.4      | 6.4                |
|            | 3  | 2   | PZE_102152279 | 198891                 | 129.6                 | 127-141             | 8.5       | 4.2                |
|            | 4  | 3   | PZE_103137887 | 191279 - 196563        | 100.1                 | 96-101              | 12.4      | 5.7                |
|            | 5  | 4   | PZE_104021283 | 22836                  | 54.9                  | 54-57               | 12.1      | 5.6                |
|            | 6  | 4   | PZE_104152609 | 237454 - 237702        | 153.3                 | 127-154             | 4.5       | 2.7                |
|            | 7  | 5   | PZE_105078335 | 88752 - 139163         | 82.1                  | 81-85               | 8.1       | 4.1                |
|            | 8  | 6   | PZE_106097864 | 151579                 | 83.5                  | 82-84               | 9.5       | 4.6                |
|            | 9  | 7   | PZE_107127708 | 170248                 | 126.7                 | 123-131             | 5.5       | 3.1                |
|            | 10 | 8   | PZE_108105216 | 159953                 | 94.1                  | 92-111              | 6         | 3.2                |
|            | 11 | 10  | PZE_110047350 | 88553 - 97551          | 44.6                  | 44-45               | 34.2      | 14.2               |
| DtSILK (d) | 1  | 1   | PZE_101005818 | 4452                   | 10.3                  | 9-12                | 6.9       | 2.2                |
|            | 2  | 1   | PZE_101143233 | 184616                 | 113.9                 | 101-115             | 26.3      | 6.7                |
|            | 3  | 1   | PZE_101181658 | 226175                 | 153.1                 | 148 -198            | 4.6       | 1.6                |
|            | 4  | 2   | PZE_102129781 | 178613 - 179981        | 102.1                 | 101-162             | 5.4       | 1.8                |
|            | 5  | 3   | PZE_103121610 | 69965 - 179545         | 79.5                  | 61-80               | 6.8       | 2.1                |
|            | 6  | 4   | PZE_104027603 | 23555 - 38027          | 55.1                  | 52-57               | 31.8      | 8                  |
|            | 7  | 5   | PZE_105033399 | 17477 - 18623          | 59.8                  | 54-60               | 6.7       | 2.1                |
|            | 8  | 5   | PZE_105093579 | 135624 - 150088        | 84.2                  | 80-86               | 7.3       | 2.2                |
|            | 9  | 5   | PZE_105163109 | 204822 - 205566        | 138.6                 | 132-140             | 5.3       | 1.8                |
|            | 10 | 6   | PZE_106049962 | 99771                  | 33.4                  | 27-42               | 8         | 2.4                |
|            | 11 | 7   | PZE_107130719 | 171824                 | 131.5                 | 125-133             | 5.6       | 1.9                |
|            | 12 | 8   | PZE_108067425 | 119151                 | 68.4                  | 65-91               | 5.3       | 1.8                |
|            | 13 | 8   | PZE_108135936 | 175699 - 175734        | 139.7                 | 117-140             | 6.1       | 2                  |
|            | 14 | 9   | PZE_109009942 | 11080 - 11080          | 31.3                  | 31-32               | 13        | 3.5                |

|           |    |    |               |                 |       |         |      |      |
|-----------|----|----|---------------|-----------------|-------|---------|------|------|
|           | 15 | 10 | PZE_110049100 | 91959 - 127347  | 49.7  | 49-50   | 94.6 | 27.5 |
| DtTAS (d) | 1  | 1  | PZE_101005766 | 4609            | 10.8  | 9-13    | 6.8  | 2.5  |
|           | 2  | 1  | PZE_101108474 | 115220 - 161708 | 103   | 100-103 | 31.7 | 9    |
|           | 3  | 1  | PZE_101198020 | 246399 - 250557 | 173.3 | 164-175 | 6.2  | 2.3  |
|           | 4  | 3  | PZE_103098655 | 158895          | 67.4  | 67-68   | 9    | 3    |
|           | 5  | 3  | PZE_103153521 | 206703          | 114.1 | 110-115 | 8.5  | 2.9  |
|           | 6  | 4  | PZE_104025625 | 30431 - 37023   | 57    | 52-57   | 27.6 | 7.9  |
|           | 7  | 5  | PZE_105068746 | 71898 - 87721   | 78.6  | 78-79   | 21.6 | 6.3  |
|           | 8  | 6  | PZE_106061581 | 111966 - 112514 | 47.3  | 46-49   | 8.5  | 2.9  |
|           | 9  | 7  | PZE_107127708 | 170248          | 126.7 | 124-130 | 8.5  | 2.9  |
|           | 10 | 8  | PZE_108066752 | 118422 - 119082 | 68.3  | 68-69   | 15   | 4.6  |
|           | 11 | 9  | PZE_109007521 | 8233            | 23.3  | 23-38   | 7.6  | 2.6  |
|           | 12 | 10 | PZE_110048157 | 90243 - 122268  | 48.7  | 46-49   | 62.7 | 18.6 |
| PH (cm)   | 1  | 1  | PZE_101127891 | 162428 - 178788 | 108.7 | 108-109 | 12.7 | 5.4  |
|           | 2  | 2  | PZE_102074552 | 39031 - 55241   | 78    | 18-85   | 9    | 4.1  |
|           | 3  | 2  | PZE_102169535 | 213168          | 143.9 | 140-145 | 6.9  | 3.3  |
|           | 4  | 4  | PZE_104022475 | 23556 - 24765   | 57.2  | 55-60   | 12   | 5.1  |
|           | 5  | 5  | PZE_105151348 | 202416          | 134.5 | 132-136 | 6.4  | 3.2  |
|           | 6  | 7  | PZE_107061937 | 118305          | 58.2  | 53-62   | 4.9  | 2.6  |
|           | 7  | 7  | PZE_107128331 | 170536          | 128.5 | 121-129 | 7.2  | 3.4  |
|           | 8  | 8  | PZE_108098736 | 155052          | 87.2  | 87-92   | 17.8 | 7.1  |
|           | 9  | 10 | PZE_110048157 | 90243 - 122268  | 48.7  | 46-49   | 55.4 | 21.7 |

**Table S4 Results of the QTL detection in the flint design using the LDLA – 5 cM model.** For each detected QTL, we showed its genetic position on the flint consensus map, its confidence interval, its level of significance and the partial percentage of variance explained. We also showed the name of one of the markers located at the detected position and their range of physical position(s) on the B73 v2 genome (Gore et al. 2009).

| Trait                      | Nb | Chr | Marker        | Physical position (kb) | Genetic position |           |                    |
|----------------------------|----|-----|---------------|------------------------|------------------|-----------|--------------------|
|                            |    |     |               |                        | (cM)             | -log10(p) | R <sup>2</sup> (%) |
| DMC (%)                    | 1  | 1   | PZE_101147104 | 190602                 | 119.4            | 7.3       | 2.9                |
|                            | 2  | 1   | PZE_101250881 | 295590                 | 225.9            | 5.6       | 2.2                |
|                            | 3  | 2   | PZE_102025627 | 11947                  | 39.2             | 7         | 1.8                |
|                            | 4  | 2   | PZE_102046822 | 24366                  | 63.7             | 7.3       | 3.4                |
|                            | 5  | 2   | PZE_102183284 | 225854                 | 157.9            | 8         | 3                  |
|                            | 6  | 4   | PZE_104021283 | 22836                  | 54.9             | 11.2      | 4.8                |
|                            | 7  | 5   | PZE_105085637 | 107137 - 138073        | 80.4             | 10.2      | 4.3                |
|                            | 8  | 5   | PZE_105165365 | 208891 - 209048        | 148.7            | 5.2       | 1.6                |
|                            | 9  | 6   | PZE_106076029 | 131411 - 134098        | 64.2             | 4.9       | 2.3                |
|                            | 10 | 8   | PZE_108018911 | 18447                  | 43.1             | 7.5       | 2.9                |
|                            | 11 | 10  | PZE_110049849 | 93025 - 115573         | 46               | 70.2      | 29.2               |
| DMY (dt.ha <sup>-1</sup> ) | 1  | 1   | PZE_101147651 | 191513                 | 118.9            | 13.3      | 5.7                |
|                            | 2  | 1   | PZE_101213494 | 263732                 | 185.2            | 5.7       | 2.6                |
|                            | 3  | 3   | PZE_103098382 | 158668 - 159808        | 66.8             | 7.9       | 4.1                |
|                            | 4  | 4   | PZE_104020618 | 21905                  | 55               | 13.5      | 6.3                |
|                            | 5  | 4   | PZE_104123129 | 200190                 | 129.8            | 5.3       | 2.9                |
|                            | 6  | 5   | PZE_105068572 | 71700 - 72614          | 75.9             | 6.9       | 3.7                |
|                            | 7  | 6   | PZE_106107736 | 156986                 | 95.6             | 4.3       | 1.2                |
|                            | 8  | 7   | PZE_107128866 | 170819                 | 127.8            | 10        | 3.5                |
|                            | 9  | 8   | PZE_108029326 | 27221 - 66473          | 50.1             | 6.6       | 3.4                |
|                            | 10 | 10  | PZE_110045930 | 86778 - 109582         | 46.3             | 31.3      | 14.3               |
| DtSILK (d)                 | 1  | 1   | PZE_101005818 | 4452                   | 10.3             | 5.2       | 1.2                |
|                            | 2  | 1   | PZE_101146834 | 190143                 | 119.1            | 34.3      | 8.1                |
|                            | 3  | 1   | PZE_101199192 | 248322                 | 171.8            | 15        | 3.9                |
|                            | 4  | 2   | PZE_102179704 | 222468                 | 154.6            | 10.1      | 2.4                |
|                            | 5  | 3   | PZE_103098382 | 158668 - 159808        | 66.8             | 8.2       | 2.4                |
|                            | 6  | 3   | PZE_103121610 | 69965 - 179545         | 79.5             | 7.8       | 2                  |
|                            | 7  | 4   | PZE_104062511 | 44504 - 124929         | 62.6             | 31.7      | 8.1                |
|                            | 8  | 5   | PZE_105078445 | 86146 - 140781         | 80.7             | 18.6      | 4.7                |
|                            | 9  | 5   | PZE_105153835 | 204326 - 205504        | 137.6            | 10.9      | 2.4                |
|                            | 10 | 7   | PZE_107133704 | 173181                 | 139.3            | 7.6       | 1.6                |
|                            | 11 | 8   | PZE_108066557 | 118189                 | 68.7             | 7.4       | 1.9                |
|                            | 12 | 8   | PZE_108133033 | 173617                 | 133.8            | 6.6       | 1.1                |
|                            | 13 | 9   | PZE_109009936 | 11079                  | 31.6             | 11.6      | 2.8                |

|           |    |    |               |                 |       |      |      |
|-----------|----|----|---------------|-----------------|-------|------|------|
|           | 14 | 10 | PZE_110048157 | 90243 - 122268  | 48.7  | 98.7 | 29.1 |
| DtTAS (d) | 1  | 1  | PZE_101005765 | 4609            | 10    | 6.5  | 1.8  |
|           | 1  | 1  | PZE_101109004 | 116312 - 158005 | 105.3 | 7.3  | 2.5  |
|           | 2  | 1  | PZE_101147104 | 190602          | 119.4 | 6.9  | 2.2  |
|           | 3  | 1  | PZE_101213102 | 263154          | 185.3 | 9    | 2.7  |
|           | 4  | 3  | PZE_103098655 | 158895          | 67.4  | 8.9  | 2.7  |
|           | 5  | 3  | PZE_103158635 | 210426          | 116.9 | 7.7  | 2.2  |
|           | 6  | 4  | PZE_104044703 | 33362 - 96313   | 60.7  | 21.6 | 6.8  |
|           | 7  | 5  | PZE_105066936 | 69125 - 83278   | 77.8  | 21.9 | 6.5  |
|           | 8  | 7  | PZE_107136925 | 174718          | 144.3 | 5.7  | 1.3  |
|           | 9  | 8  | PZE_108019174 | 18351           | 42.8  | 6.8  | 2    |
|           | 10 | 8  | PZE_108073574 | 128549 - 128753 | 75.2  | 13.4 | 3.9  |
|           | 11 | 9  | PZE_109009220 | 10008 - 10009   | 28.4  | 9.5  | 2.4  |
|           | 12 | 10 | PZE_110048157 | 90243 - 122268  | 48.7  | 58.1 | 18.3 |
|           | 13 | 1  | PZE_101005765 | 4609            | 10    | 6.5  | 1.8  |
| PH (cm)   | 1  | 1  | PZE_101146427 | 189406          | 118.5 | 14.7 | 5.2  |
|           | 2  | 2  | PZE_102074552 | 39031 - 55241   | 78    | 9.3  | 3.8  |
|           | 3  | 2  | PZE_102173058 | 216192          | 146.8 | 7.4  | 2.9  |
|           | 4  | 4  | PZE_104045760 | 68246 - 68323   | 58.7  | 10.6 | 4.4  |
|           | 5  | 4  | PZE_104103602 | 179801 - 180054 | 102.8 | 6.6  | 2.4  |
|           | 6  | 5  | PZE_105150122 | 201632          | 128.7 | 8.7  | 2.7  |
|           | 7  | 7  | PZE_107128144 | 170420 - 170496 | 126.6 | 11.2 | 3.2  |
|           | 8  | 8  | PZE_108092331 | 149305 - 155644 | 87.8  | 20.5 | 7.8  |
|           | 9  | 9  | PZE_109008703 | 9311            | 25.5  | 4.8  | 1.3  |
|           | 10 | 10 | PZE_110049849 | 93025 - 115573  | 46    | 56.8 | 21.7 |

**TableS5 Results of the QTL detection in the flint design using the LDLA – 2 cM model.** For each detected QTL, we showed its genetic position on the flint consensus map, its confidence interval, its level of significance and the partial percentage of variance explained. We also showed the name of one of the markers located at the detected position and their range of physical position(s) on the B73 v2 genome (Gore et al. 2009).

| Trait                      | Nb | Chr | Marker        | Physical position (kb) | Genetic position (cM) | -log10(p) | R <sup>2</sup> (%) |
|----------------------------|----|-----|---------------|------------------------|-----------------------|-----------|--------------------|
| DMC (%)                    | 1  | 1   | PZE_101146598 | 189773                 | 118                   | 6.2       | 2.5                |
|                            | 2  | 2   | PZE_102185359 | 229130 - 229288        | 165                   | 5         | 1.7                |
|                            | 3  | 4   | PZE_104018885 | 18916 - 23142          | 50.3                  | 6.9       | 3.4                |
|                            | 4  | 5   | PZE_105085637 | 107137 - 138073        | 80.4                  | 9.1       | 4.6                |
|                            | 5  | 5   | PZE_105163718 | 208374                 | 149.2                 | 4.5       | 1.9                |
|                            | 6  | 8   | PZE_108063241 | 113068 - 113206        | 64.1                  | 6.5       | 3.2                |
|                            | 7  | 10  | PZE_110049849 | 93025 - 115573         | 46                    | 46.5      | 20.8               |
|                            | 8  | 10  | PZE_110089009 | 139036                 | 69.9                  | 5         | 1.4                |
| DMY (dt.ha <sup>-1</sup> ) | 1  | 1   | PZE_101146427 | 189406                 | 118.5                 | 14.9      | 5.3                |
|                            | 2  | 2   | PZE_102172077 | 215135                 | 144.9                 | 6.9       | 2.5                |
|                            | 3  | 3   | PZE_103097999 | 157939                 | 65.4                  | 6         | 1.9                |
|                            | 4  | 3   | PZE_103142979 | 198520 - 198581        | 101.6                 | 4.7       | 2.5                |
|                            | 5  | 4   | PZE_104023433 | 26403 - 26403          | 52.7                  | 15.8      | 5.8                |
|                            | 6  | 4   | PZE_104122410 | 199546 - 199546        | 126.5                 | 5.4       | 2.6                |
|                            | 7  | 5   | PZE_105092759 | 133339 - 159961        | 84.4                  | 7.4       | 3.7                |
|                            | 8  | 6   | PZE_106050624 | 100745 - 103709        | 35.4                  | 4.6       | 2.2                |
|                            | 9  | 6   | PZE_106103665 | 155178                 | 90.5                  | 7.8       | 3.4                |
|                            | 10 | 7   | PZE_107128846 | 170819                 | 128.9                 | 9         | 2.9                |
|                            | 11 | 8   | PZE_108027746 | 26074 - 29164          | 49.5                  | 6.7       | 3.4                |
|                            | 12 | 10  | PZE_110047350 | 88553 - 97551          | 44.6                  | 31.7      | 13.4               |
| DtSILK (d)                 | 1  | 1   | PZE_101005818 | 4452                   | 10.3                  | 5.6       | 1.4                |
|                            | 2  | 1   | PZE_101147104 | 190602                 | 119.4                 | 33.6      | 9.2                |
|                            | 3  | 1   | PZE_101199859 | 248854 - 249092        | 173.9                 | 14.2      | 4.1                |
|                            | 4  | 2   | PZE_102181292 | 222435 - 223721        | 156.5                 | 6.3       | 1.6                |
|                            | 5  | 3   | PZE_103118006 | 176570                 | 78.5                  | 10.9      | 3                  |
|                            | 6  | 3   | PZE_103167997 | 216529                 | 126.6                 | 9.2       | 1.9                |
|                            | 7  | 4   | PZE_104044892 | 42641 - 134020         | 62.5                  | 29.6      | 8.8                |
|                            | 8  | 5   | PZE_105039522 | 24542                  | 63.6                  | 18        | 5.4                |
|                            | 9  | 8   | PZE_108133033 | 173617                 | 133.8                 | 9.2       | 2.1                |
|                            | 10 | 9   | PZE_109010021 | 11134                  | 30.1                  | 11.9      | 2.9                |
|                            | 11 | 10  | PZE_110060375 | 114622 - 114653        | 48.6                  | 89.7      | 29.6               |
| DtTAS(d)                   | 1  | 1   | PZE_101005770 | 4610                   | 10.5                  | 5.3       | 1.5                |
|                            | 2  | 1   | PZE_101109004 | 116312 - 158005        | 105.3                 | 16        | 4.7                |
|                            | 3  | 1   | PZE_101147248 | 190703                 | 121.1                 | 6.4       | 1.7                |
|                            | 4  | 1   | PZE_101213479 | 263702 - 265655        | 186.8                 | 8.9       | 2.3                |

|         |    |               |                 |                 |       |      |      |
|---------|----|---------------|-----------------|-----------------|-------|------|------|
| 5       | 3  | PZE_103109418 | 170117 - 171781 | 75.9            | 9.3   | 2.1  |      |
| 6       | 3  | PZE_103157683 | 209726          | 116.3           | 8     | 2.1  |      |
| 7       | 4  | PZE_104044703 | 33362 - 96313   | 60.7            | 24    | 7.2  |      |
| 8       | 5  | PZE_105063310 | 62822 - 82069   | 76              | 24    | 7.1  |      |
| 9       | 6  | PZE_106064975 | 117082 - 122646 | 56.3            | 6.9   | 2.2  |      |
| 10      | 7  | PZE_107128144 | 170420 - 170496 | 126.6           | 6.1   | 1.4  |      |
| 11      | 8  | PZE_108019174 | 18351           | 42.8            | 6.8   | 1.9  |      |
| 12      | 8  | PZE_108073574 | 128549 - 128753 | 75.2            | 16.7  | 4.5  |      |
| 13      | 9  | PZE_109009220 | 10008 - 10009   | 28.4            | 11.2  | 2.5  |      |
| 14      | 10 | PZE_110049001 | 89438 - 108230  | 47.2            | 61.8  | 18.8 |      |
| <hr/>   |    |               |                 |                 |       |      |      |
| PH (cm) | 1  | 1             | PZE_101144184   | 187342 - 187381 | 118.6 | 14.2 | 4.6  |
|         | 2  | 2             | PZE_102076936   | 51554 - 59013   | 83    | 9.1  | 3.7  |
|         | 3  | 2             | PZE_102175167   | 217650          | 147.7 | 8    | 2.7  |
|         | 4  | 4             | PZE_104028514   | 34558 - 80248   | 60.2  | 11.3 | 4.8  |
|         | 5  | 4             | PZE_104104676   | 180887          | 105.6 | 6.2  | 1.5  |
|         | 6  | 5             | PZE_105144284   | 198198          | 130.3 | 7.5  | 1.9  |
|         | 7  | 7             | PZE_107057864   | 111123 - 112763 | 55.4  | 6    | 2.2  |
|         | 8  | 7             | PZE_107128144   | 170420 - 170496 | 126.6 | 9.7  | 2.8  |
|         | 9  | 8             | PZE_108092331   | 149305 - 155644 | 87.8  | 18.3 | 6.6  |
|         | 10 | 9             | PZE_109008133   | 8741            | 25.8  | 5.2  | 1.5  |
|         | 11 | 10            | PZE_110049849   | 93025 - 115573  | 46    | 56   | 21.3 |

**Table S6 Results of the QTL detection in the flint design using the LDLA – 1-marker model.** For each detected QTL, we showed its genetic position on the flint consensus map, its confidence interval, its level of significance and the partial percentage of variance explained. We also showed the name of one of the markers located at the detected position and their range of physical position(s) on the B73 v2 genome (Gore et al. 2009).

| Trait                      | Nb | Chr | Marker        | Physical position (kb) | Genetic position (cM) | $-\log_{10}(p)$ | R <sup>2</sup> (%) |
|----------------------------|----|-----|---------------|------------------------|-----------------------|-----------------|--------------------|
| DMC (%)                    | 1  | 2   | PZE_102185353 | 229130                 | 164.2                 | 5.7             | 1.7                |
|                            | 2  | 4   | PZE_104033064 | 40693                  | 60                    | 6.7             | 2.1                |
|                            | 3  | 5   | PZE_105079359 | 90584                  | 80.6                  | 11.5            | 3.9                |
|                            | 4  | 5   | PZE_105143697 | 197846                 | 126.4                 | 5.7             | 1.7                |
|                            | 5  | 8   | PZE_108063319 | 113212                 | 63.6                  | 7.2             | 2.3                |
|                            | 6  | 10  | PZE_110050010 | 94199                  | 45.9                  | 44.3            | 18.0               |
|                            | 7  | 10  | PZE_110086343 | 137505                 | 68.9                  | 6.3             | 1.9                |
| DMY (dt.ha <sup>-1</sup> ) | 1  | 1   | PZE_101128881 | 164375                 | 105.8                 | 6.3             | 1.8                |
|                            | 2  | 1   | PZE_101144216 | 187381                 | 118.6                 | 15.6            | 5.2                |
|                            | 3  | 3   | PZE_103097999 | 157939                 | 65.4                  | 10.3            | 3.3                |
|                            | 4  | 4   | PZE_104017088 | 17150                  | 48.7                  | 11.4            | 3.7                |
|                            | 5  | 4   | PZE_104021665 | 23190                  | 51.4                  | 5.8             | 1.7                |
|                            | 6  | 4   | PZE_104122007 | 198999                 | 124                   | 6.0             | 1.7                |
|                            | 7  | 5   | PZE_105094114 | 137392                 | 81.5                  | 9.7             | 3.1                |
|                            | 8  | 6   | PZE_106104239 | 155466                 | 90.7                  | 7.8             | 2.4                |
|                            | 9  | 7   | PZE_107128846 | 170819                 | 128.9                 | 8.2             | 2.5                |
|                            | 10 | 8   | PZE_108028156 | 29898                  | 51.1                  | 9.1             | 2.9                |
|                            | 11 | 10  | PZE_110050010 | 94199                  | 45.9                  | 33.0            | 12.2               |
| DtSILK (d)                 | 1  | 1   | PZE_101004387 | 3883                   | 8.5                   | 8.2             | 1.5                |
|                            | 2  | 1   | PZE_101088198 | 79735                  | 90.5                  | 10.0            | 1.9                |
|                            | 3  | 1   | PZE_101106156 | 109635                 | 102.4                 | 17.1            | 3.6                |
|                            | 4  | 1   | PZE_101151084 | 194731                 | 125.8                 | 9.4             | 1.8                |
|                            | 5  | 1   | PZE_101200614 | 249700                 | 173.1                 | 11.3            | 2.2                |
|                            | 6  | 3   | PZE_103098779 | 158974                 | 61.9                  | 11.3            | 2.2                |
|                            | 7  | 4   | PZE_104021514 | 23073                  | 51                    | 9.0             | 1.7                |
|                            | 8  | 4   | PZE_104079162 | 153502                 | 69                    | 10.8            | 2.1                |
|                            | 9  | 4   | PZE_104152590 | 237693                 | 155.7                 | 6.4             | 1.1                |
|                            | 10 | 5   | PZE_105069912 | 74335                  | 76.8                  | 21.1            | 4.6                |
|                            | 11 | 5   | PZE_105143119 | 197706                 | 127.6                 | 5.7             | 1.0                |
|                            | 12 | 7   | PZE_107128331 | 170536                 | 128.5                 | 6.5             | 1.2                |
|                            | 13 | 8   | PZE_108070056 | 122950                 | 71                    | 12.0            | 2.4                |
|                            | 14 | 9   | PZE_109009591 | 10597                  | 30.3                  | 7.1             | 1.3                |
|                            | 15 | 10  | PZE_110016138 | 16504                  | 38.6                  | 11.2            | 2.2                |
|                            | 16 | 10  | PZE_110050010 | 94199                  | 45.9                  | 45.7            | 11.1               |
| DtTAS(d)                   | 1  | 1   | PZE_101004387 | 3883                   | 8.5                   | 6.1             | 1.2                |

|         |    |    |               |        |       |      |      |
|---------|----|----|---------------|--------|-------|------|------|
|         | 2  | 1  | PZE_101115961 | 138907 | 103.5 | 14.5 | 3.3  |
|         | 3  | 1  | PZE_101144216 | 187381 | 118.6 | 23.2 | 5.6  |
|         | 4  | 1  | PZE_101160171 | 202307 | 128   | 6.7  | 1.3  |
|         | 5  | 1  | PZE_101200614 | 249700 | 173.1 | 8.5  | 1.8  |
|         | 6  | 3  | PZE_103007349 | 4064   | 11.7  | 8.6  | 1.8  |
|         | 7  | 3  | PZE_103098779 | 158974 | 61.9  | 14.0 | 3.2  |
|         | 8  | 4  | PZE_104021514 | 23073  | 51    | 9.7  | 2.1  |
|         | 9  | 4  | PZE_104079162 | 153502 | 69    | 10.0 | 2.1  |
|         | 10 | 5  | PZE_105069912 | 74335  | 76.8  | 24.7 | 6.0  |
|         | 11 | 6  | PZE_106066817 | 119166 | 57.4  | 5.5  | 1.0  |
|         | 12 | 8  | PZE_108067255 | 118970 | 68.8  | 5.8  | 1.1  |
|         | 13 | 8  | PZE_108074213 | 129415 | 75.5  | 10.3 | 2.2  |
|         | 14 | 9  | PZE_109111133 | 151251 | 109.1 | 6.5  | 1.3  |
|         | 15 | 10 | PZE_110018448 | 22128  | 38.9  | 8.9  | 1.9  |
|         | 16 | 10 | PZE_110050010 | 94199  | 45.9  | 57.5 | 16.1 |
| PH (cm) | 1  | 1  | PZE_101145493 | 188172 | 115.6 | 8.3  | 2.4  |
|         | 2  | 2  | PZE_102074558 | 55249  | 79.5  | 9.8  | 3.0  |
|         | 3  | 4  | PZE_104042538 | 60023  | 63.1  | 11.6 | 3.6  |
|         | 4  | 5  | PZE_105091638 | 129996 | 83.4  | 7.8  | 2.3  |
|         | 5  | 5  | PZE_105134752 | 195420 | 117.6 | 9.9  | 3.0  |
|         | 6  | 6  | PZE_106097959 | 151785 | 84.1  | 6.1  | 1.7  |
|         | 7  | 7  | PZE_107127637 | 170111 | 126.3 | 7.4  | 2.1  |
|         | 8  | 8  | PZE_108105216 | 159953 | 94.1  | 16.6 | 5.3  |
|         | 9  | 10 | PZE_110050010 | 94199  | 45.9  | 53.9 | 20.6 |



**Table S7 Results of the QTL detection in the dent design using the connected model.** For each detected QTL, we showed its genetic position on the dent consensus map, its confidence interval, its level of significance and the partial percentage of variance explained. We also showed the name of one of the markers located at the detected position and their range of physical position(s) on the B73 v2 genome (Gore et al. 2009).

| Trait         | Nb | Chr | Marker        | Physical position (kb) | Genetic position (cM) | Confidence interval | $-\log_{10}(p)$ | R <sup>2</sup> (%) |
|---------------|----|-----|---------------|------------------------|-----------------------|---------------------|-----------------|--------------------|
| DMC (%)       | 1  | 1   | PZE_101031077 | 19101                  | 35.2                  | 32-39               | 11.7            | 4.8                |
|               | 2  | 2   | PZE_102011868 | 5425                   | 17.1                  | 16-18               | 13.4            | 5.3                |
|               | 3  | 2   | PZE_102149235 | 195177 - 197936        | 94.4                  | 88-100              | 5.4             | 2.6                |
|               | 4  | 3   | PZE_103091082 | 150173 - 165855        | 63.5                  | 58-64               | 16.8            | 6.5                |
|               | 5  | 4   | PZE_104079076 | 153406                 | 59                    | 57-61               | 10              | 4.2                |
|               | 6  | 5   | PZE_105026024 | 13303 - 13313          | 42.8                  | 42-45               | 10.6            | 4.4                |
|               | 7  | 6   | PZE_106002839 | 3588 - 3869            | 2.9                   | 1-6                 | 10.4            | 4.3                |
|               | 8  | 6   | PZE_106098045 | 151822                 | 75.1                  | 72-79               | 9.6             | 4.1                |
|               | 9  | 8   | PZE_108058161 | 103705 - 103897        | 51.3                  | 51-58               | 18              | 6.9                |
|               | 10 | 9   | PZE_109009836 | 10943                  | 29.3                  | 27-30               | 6               | 2.8                |
|               | 11 | 9   | PZE_109096235 | 141951                 | 74.4                  | 70-76               | 6.8             | 3.1                |
|               | 12 | 10  | PZE_110048796 | 91481 - 107902         | 46.4                  | 27-53               | 5.7             | 2.7                |
| DMY (dt.ha-1) | 1  | 1   | PZE_101071870 | 54342                  | 59.2                  | 57-62               | 5.7             | 3.8                |
|               | 2  | 1   | PZE_101215677 | 266310 - 266369        | 144.6                 | 123-160             | 5.5             | 3.7                |
|               | 3  | 3   | PZE_103108908 | 169730 - 172477        | 70.8                  | 66-76               | 5.5             | 3.7                |
|               | 4  | 3   | PZE_103160673 | 211719 - 212707        | 116.2                 | 115-129             | 6.2             | 4                  |
|               | 5  | 3   | PZE_103185177 | 229665                 | 147.3                 | 146-148             | 6.3             | 4.1                |
|               | 6  | 6   | PZE_106038467 | 86549                  | 16.8                  | 9-20                | 14.9            | 8                  |
|               | 7  | 7   | PZE_107066645 | 123598 - 126465        | 58.2                  | 57-61               | 11.7            | 6.6                |
|               | 8  | 8   | PZE_108057442 | 102536 - 108663        | 52.9                  | 52-53               | 14.2            | 7.7                |
| DtSILK (d)    | 1  | 1   | PZE_101033622 | 21685                  | 38.5                  | 32-39               | 11.6            | 4.7                |
|               | 2  | 1   | PZE_101081841 | 69289 - 70518          | 66.2                  | 65-67               | 4.6             | 2.3                |
|               | 3  | 1   | PZE_101194503 | 241368 - 244469        | 129.1                 | 128-133             | 6.6             | 3                  |
|               | 4  | 2   | PZE_102148927 | 195747 - 196529        | 93.9                  | 93-96               | 9.1             | 3.8                |
|               | 5  | 3   | PZE_103110415 | 170772 - 174828        | 72                    | 65-72               | 15.9            | 6.1                |
|               | 6  | 3   | PZE_103147207 | 201536 - 202769        | 103.4                 | 101-110             | 5.5             | 2.6                |
|               | 7  | 6   | PZE_106095147 | 150309                 | 72.4                  | 70-74               | 13              | 5.1                |
|               | 8  | 7   | PZE_107072681 | 129265                 | 63.2                  | 43-67               | 8.4             | 3.6                |
|               | 9  | 8   | PZE_108057885 | 103311                 | 50.4                  | 50-54               | 26.4            | 9.6                |
|               | 10 | 9   | PZE_109020361 | 18684 - 20598          | 42.9                  | 38-45               | 5               | 2.5                |
|               | 11 | 10  | PZE_110057591 | 110540 - 120784        | 49.8                  | 49-52               | 7.2             | 3.2                |
| DtTAS (d)     | 1  | 1   | PZE_101033622 | 21685                  | 38.5                  | 36-39               | 10.8            | 5.4                |
|               | 2  | 2   | PZE_102157405 | 204235                 | 99.8                  | 99-100              | 6               | 3.4                |

|         |    |    |               |                 |      |         |      |      |
|---------|----|----|---------------|-----------------|------|---------|------|------|
|         | 3  | 3  | PZE_103101981 | 162179 - 167076 | 63.7 | 61-65   | 23.2 | 10.4 |
|         | 4  | 5  | PZE_105144068 | 198031          | 91.6 | 91-96   | 7.3  | 3.9  |
|         | 5  | 7  | PZE_107076807 | 132075          | 67.1 | 48-68   | 13.7 | 6.5  |
|         | 6  | 8  | PZE_108058411 | 104281 - 104625 | 53.7 | 50-55   | 19.4 | 8.8  |
|         | 7  | 9  | PZE_109092637 | 139196 - 140154 | 71.3 | 56-74   | 7.1  | 3.9  |
| PH (cm) | 1  | 1  | PZE_101018818 | 10905           | 23.7 | 21-24   | 7.5  | 3    |
|         | 2  | 1  | PZE_101133561 | 172881 - 172940 | 81.5 | 80-84   | 13.2 | 4.7  |
|         | 3  | 1  | PZE_101196829 | 245032 - 245219 | 131  | 127-133 | 17.9 | 6.1  |
|         | 4  | 3  | PZE_103110278 | 170548          | 71.8 | 69-73   | 8.1  | 3.2  |
|         | 5  | 4  | PZE_104073340 | 138154 - 144727 | 55.2 | 53-58   | 6.9  | 2.8  |
|         | 6  | 5  | PZE_105065019 | 66038 - 79496   | 59.4 | 58-60   | 7.1  | 2.9  |
|         | 7  | 6  | PZE_106040994 | 89408 - 91643   | 19.9 | 19-20   | 27.7 | 9.1  |
|         | 8  | 7  | PZE_107005418 | 3665 - 3667     | 12.3 | 2-16    | 5.1  | 2.2  |
|         | 9  | 7  | PZE_107080996 | 135892          | 71.4 | 71-72   | 17.6 | 6    |
|         | 10 | 8  | PZE_108056028 | 100939 - 102711 | 49.7 | 49-52   | 23.3 | 7.7  |
|         | 11 | 8  | PZE_108078317 | 130737 - 134065 | 68.8 | 68-69   | 14.9 | 5.2  |
|         | 12 | 9  | PZE_109025803 | 25986           | 49.1 | 48-50   | 4    | 1.9  |
|         | 13 | 9  | PZE_109086708 | 134570 - 135460 | 67.8 | 67-70   | 7.8  | 3.1  |
|         | 14 | 10 | PZE_110008028 | 6072            | 22.6 | 22-26   | 12.2 | 4.4  |

**Table S8 Results of the QTL detection in the dent design using the LDLA – 5 cM model.** For each detected QTL, we showed its genetic position on the dent consensus map, its confidence interval, its level of significance and the partial percentage of variance explained. We also showed the name of one of the markers located at the detected position and their range of physical position(s) on the B73 v2 genome (Gore et al. 2009).

| Trait                      | Nb | Chr | Marker        | Physical position (kb) | Genetic position (cM) | -log <sub>10</sub> (p) | R <sup>2</sup> (%) |
|----------------------------|----|-----|---------------|------------------------|-----------------------|------------------------|--------------------|
| DMC (%)                    | 1  | 1   | PZE_101028121 | 16789 - 17963          | 31.6                  | 11                     | 3.9                |
|                            | 2  | 1   | PZE_101150204 | 193868 - 194764        | 92                    | 4.9                    | 2                  |
|                            | 3  | 1   | PZE_101202934 | 249700 - 251159        | 134.9                 | 7.9                    | 3.1                |
|                            | 4  | 2   | PZE_102006385 | 3379                   | 9.6                   | 6.4                    | 1.5                |
|                            | 5  | 2   | PZE_102150016 | 196649                 | 94                    | 8.9                    | 2.9                |
|                            | 6  | 3   | PZE_103038564 | 33572 - 56014          | 46                    | 17.6                   | 6.4                |
|                            | 7  | 3   | PZE_103151042 | 204999                 | 105                   | 5.4                    | 2.3                |
|                            | 8  | 4   | PZE_104081311 | 155805                 | 59.6                  | 10.2                   | 4                  |
|                            | 9  | 5   | PZE_105047074 | 35783 - 36699          | 52.3                  | 12.4                   | 4.9                |
|                            | 10 | 6   | PZE_106007445 | 18846 - 21466          | 9.9                   | 11.7                   | 4.3                |
|                            | 11 | 6   | PZE_106096901 | 150891                 | 71.7                  | 12.7                   | 4.6                |
|                            | 12 | 7   | PZE_107040665 | 154074                 | 66.8                  | 3.6                    | 1.7                |
|                            | 13 | 8   | PZE_108057885 | 103311                 | 50.4                  | 19.1                   | 6.1                |
|                            | 14 | 9   | PZE_109089324 | 137410                 | 68.6                  | 9                      | 3.5                |
|                            | 15 | 10  | PZE_110012467 | 10879                  | 31.8                  | 7.7                    | 2.2                |
| DMY (dt.ha <sup>-1</sup> ) | 1  | 3   | PZE_103116584 | 175989                 | 78.9                  | 8                      | 3.9                |
|                            | 2  | 3   | PZE_103162977 | 213416                 | 117.8                 | 7.8                    | 4.3                |
|                            | 3  | 6   | PZE_106038467 | 86549                  | 16.8                  | 13.8                   | 8.1                |
|                            | 4  | 7   | PZE_107066645 | 123598 - 126465        | 58.2                  | 8.8                    | 5.6                |
|                            | 5  | 8   | PZE_108057442 | 102536 - 108663        | 52.9                  | 10.3                   | 5.8                |
| DtSILK (d)                 | 1  | 1   | PZE_101033622 | 21685                  | 38.5                  | 22.6                   | 7.2                |
|                            | 2  | 1   | PZE_101205734 | 251079 - 254464        | 136.4                 | 6.7                    | 2.4                |
|                            | 3  | 2   | PZE_102152020 | 198672                 | 94.5                  | 15                     | 4.5                |
|                            | 4  | 3   | PZE_103086165 | 142732 - 157202        | 61.7                  | 10                     | 3.6                |
|                            | 5  | 3   | PZE_103122617 | 180515                 | 78.6                  | 16.3                   | 4.7                |
|                            | 6  | 5   | PZE_105049624 | 41635 - 58706          | 56.3                  | 4.8                    | 2.2                |
|                            | 7  | 6   | PZE_106094705 | 149930                 | 71                    | 16.5                   | 5.4                |
|                            | 8  | 7   | PZE_107045046 | 25471 - 104886         | 43.9                  | 7.4                    | 3                  |
|                            | 9  | 7   | PZE_107107125 | 158951 - 158952        | 82.1                  | 5.8                    | 2                  |
|                            | 10 | 8   | PZE_108058411 | 104281 - 104625        | 53.7                  | 27.7                   | 8.9                |
|                            | 11 | 9   | PZE_109098496 | 143352                 | 77.3                  | 5.5                    | 2                  |
|                            | 12 | 10  | PZE_110057591 | 110540 - 120784        | 49.8                  | 8                      | 3.1                |
| DtTAS(d)                   | 1  | 1   | PZE_101032015 | 19641 - 21075          | 35.7                  | 13.2                   | 4.8                |
|                            | 2  | 2   | PZE_102159907 | 206081 - 207151        | 102.9                 | 7.1                    | 2.8                |
|                            | 3  | 3   | PZE_103098157 | 158352                 | 60.8                  | 21                     | 7.6                |

|         |    |    |               |                 |       |      |     |
|---------|----|----|---------------|-----------------|-------|------|-----|
|         | 4  | 3  | PZE_103143600 | 199245 - 201331 | 102.2 | 8    | 3.1 |
|         | 5  | 5  | PZE_105143985 | 197957 - 200116 | 95.6  | 5.1  | 2   |
|         | 6  | 6  | PZE_106033981 | 79499 - 86347   | 16    | 6.1  | 2.7 |
|         | 7  | 6  | PZE_106092387 | 148530 - 150461 | 72    | 6    | 2.5 |
|         | 8  | 7  | PZE_107045046 | 25471 - 104886  | 43.9  | 7.6  | 3.4 |
|         | 9  | 7  | PZE_107099124 | 152685 - 155704 | 79.9  | 6.1  | 2.7 |
|         | 10 | 8  | PZE_108062375 | 111291          | 54.3  | 23.6 | 8.3 |
|         | 11 | 9  | PZE_109094832 | 141175          | 73.4  | 11.1 | 3.9 |
| PH (cm) | 1  | 1  | PZE_101018868 | 10962           | 21.4  | 5.5  | 2.1 |
|         | 2  | 1  | PZE_101133356 | 172811          | 81.4  | 12.9 | 4.4 |
|         | 3  | 1  | PZE_101196829 | 245032 - 245219 | 131   | 17.9 | 6.1 |
|         | 4  | 3  | PZE_103111112 | 171438 - 175550 | 75.5  | 10.8 | 3.9 |
|         | 5  | 4  | PZE_104073340 | 138154 - 144727 | 55.2  | 4.9  | 2   |
|         | 6  | 4  | PZE_104136077 | 202589 - 227111 | 109.7 | 7.4  | 2.6 |
|         | 7  | 5  | PZE_105068432 | 70082 - 86033   | 60.4  | 6.1  | 2.7 |
|         | 8  | 6  | PZE_106040975 | 89403 - 89404   | 19.3  | 28.4 | 9.3 |
|         | 9  | 7  | PZE_107076796 | 132076          | 65.4  | 19   | 6.3 |
|         | 10 | 8  | PZE_108056028 | 100939 - 102711 | 49.7  | 25.7 | 8.2 |
|         | 11 | 8  | PZE_108079422 | 133563 - 138524 | 71.4  | 11.7 | 4.1 |
|         | 12 | 9  | PZE_109085253 | 133933          | 68.1  | 21.3 | 7.2 |
|         | 13 | 10 | PZE_110014332 | 11179 - 13553   | 33.8  | 11   | 3.3 |

**Table S9 Results of the QTL detection in the dent design using the LDLA – 2 cM model.** For each detected QTL, we showed its genetic position on the dent consensus map, its confidence interval, its level of significance and the partial percentage of variance explained. We also showed the name of one of the markers located at the detected position and their range of physical position(s) on the B73 v2 genome (Gore et al. 2009).

| Trait                      | Nb | Chr | Marker        | Physical position (kb) | Genetic position (cM) | -log <sub>10</sub> (p) | R <sup>2</sup> (%) |
|----------------------------|----|-----|---------------|------------------------|-----------------------|------------------------|--------------------|
| DMC (%)                    | 1  | 1   | PZE_101036345 | 23712                  | 38                    | 12.4                   | 4                  |
|                            | 2  | 1   | PZE_101154088 | 194939 - 197272        | 93.9                  | 6.2                    | 2.3                |
|                            | 3  | 1   | PZE_101203104 | 250888                 | 131.9                 | 7.1                    | 2.8                |
|                            | 4  | 2   | PZE_102002360 | 1724                   | 4.7                   | 8.5                    | 2                  |
|                            | 5  | 2   | PZE_102017964 | 8279                   | 23.4                  | 7.7                    | 2.2                |
|                            | 6  | 2   | PZE_102152020 | 198672                 | 94.5                  | 8.5                    | 3                  |
|                            | 7  | 3   | PZE_103093079 | 154090 - 160936        | 63.9                  | 16.7                   | 5.4                |
|                            | 8  | 3   | PZE_103148259 | 202185                 | 104.1                 | 5.4                    | 2                  |
|                            | 9  | 4   | PZE_104076988 | 151510 - 151684        | 56.9                  | 10.3                   | 3.5                |
|                            | 10 | 5   | PZE_105047074 | 35783 - 36699          | 52.3                  | 13.3                   | 4.9                |
|                            | 11 | 6   | PZE_106020123 | 14400 - 24611          | 10                    | 14.3                   | 4.4                |
|                            | 12 | 6   | PZE_106097959 | 151785                 | 73.1                  | 14.1                   | 4.3                |
|                            | 13 | 7   | PZE_107045895 | 24563 - 103626         | 43.6                  | 5.8                    | 2.4                |
|                            | 14 | 8   | PZE_108061901 | 110744 - 115294        | 57.2                  | 19.7                   | 6.4                |
|                            | 15 | 9   | PZE_109091148 | 138616 - 138617        | 69.6                  | 12.7                   | 4.2                |
|                            | 16 | 10  | PZE_110012769 | 11241                  | 33                    | 8.2                    | 2.2                |
| DMY (dt.ha <sup>-1</sup> ) | 1  | 1   | PZE_101183895 | 228556                 | 119.6                 | 4.8                    | 2.3                |
|                            | 2  | 3   | PZE_103113115 | 172857 - 178134        | 78.3                  | 8.4                    | 4                  |
|                            | 3  | 3   | PZE_103159262 | 210755 - 210760        | 114.6                 | 7.8                    | 3.7                |
|                            | 4  | 6   | PZE_106032535 | 75517 - 86627          | 15.5                  | 13.3                   | 6.9                |
|                            | 5  | 7   | PZE_107069530 | 126351                 | 58.1                  | 9.3                    | 5                  |
|                            | 6  | 8   | PZE_108057745 | 103023 - 103457        | 53                    | 10.5                   | 5.8                |
| DtSILK (d)                 | 1  | 1   | PZE_101035008 | 19696 - 22646          | 37.8                  | 22                     | 6.9                |
|                            | 2  | 1   | PZE_101205734 | 251079 - 254464        | 136.4                 | 7.4                    | 2.2                |
|                            | 3  | 2   | PZE_102151348 | 197954                 | 94.7                  | 12.9                   | 4.1                |
|                            | 4  | 3   | PZE_103086165 | 142732 - 157202        | 61.7                  | 10.2                   | 3.7                |
|                            | 5  | 3   | PZE_103122617 | 180515                 | 78.6                  | 16.3                   | 4.7                |
|                            | 6  | 5   | PZE_105049624 | 41635 - 58706          | 56.3                  | 4.9                    | 2.3                |
|                            | 7  | 6   | PZE_106095370 | 150525 - 150588        | 72.6                  | 17.5                   | 5.1                |
|                            | 8  | 7   | PZE_107045046 | 25471 - 104886         | 43.9                  | 8.7                    | 3.3                |
|                            | 9  | 7   | PZE_107106025 | 158126                 | 81.1                  | 6.1                    | 2                  |
|                            | 10 | 8   | PZE_108062521 | 111781                 | 54.6                  | 28.2                   | 8.9                |
|                            | 11 | 9   | PZE_109098632 | 143808                 | 78.5                  | 6.1                    | 2.1                |
|                            | 12 | 10  | PZE_110057591 | 110540 - 120784        | 49.8                  | 7.8                    | 3                  |
| DtTAS(d)                   | 1  | 1   | PZE_101032015 | 19641 - 21075          | 35.7                  | 12.9                   | 5                  |

|         |    |    |               |                 |       |      |     |
|---------|----|----|---------------|-----------------|-------|------|-----|
|         | 2  | 2  | PZE_102161022 | 207043          | 102.3 | 6.5  | 2.6 |
|         | 3  | 3  | PZE_103098157 | 158352          | 60.8  | 21.2 | 8.3 |
|         | 4  | 3  | PZE_103143600 | 199245 - 201331 | 102.2 | 7.8  | 3.2 |
|         | 5  | 5  | PZE_105143697 | 197846 - 200369 | 95.5  | 5    | 2.2 |
|         | 6  | 7  | PZE_107045046 | 25471 - 104886  | 43.9  | 6.1  | 2.9 |
|         | 7  | 7  | PZE_107099124 | 152685 - 155704 | 79.9  | 6    | 2.9 |
|         | 8  | 8  | PZE_108058411 | 104281 - 104625 | 53.7  | 20   | 7.6 |
|         | 9  | 9  | PZE_109090152 | 137787 - 138020 | 70.1  | 9.2  | 3.7 |
| PH (cm) | 1  | 1  | PZE_101132703 | 171230 - 178401 | 82.3  | 10.6 | 4.1 |
|         | 2  | 1  | PZE_101196829 | 245032 - 245219 | 131   | 15.9 | 6   |
|         | 3  | 3  | PZE_103119393 | 178152 - 178564 | 79.1  | 8.9  | 2.8 |
|         | 4  | 4  | PZE_104073794 | 145614          | 55.7  | 6.4  | 2.5 |
|         | 5  | 4  | PZE_104138654 | 204861 - 226068 | 109.4 | 6.2  | 2.5 |
|         | 6  | 5  | PZE_105070660 | 74660 - 145496  | 61.9  | 5.2  | 2.5 |
|         | 7  | 6  | PZE_106044620 | 93734           | 20.4  | 20.4 | 6.4 |
|         | 8  | 7  | PZE_107077092 | 132190          | 66.5  | 19.9 | 6.5 |
|         | 9  | 8  | PZE_108038271 | 26346 - 65101   | 43.6  | 22.4 | 8.1 |
|         | 10 | 8  | PZE_108081297 | 133441 - 143002 | 71.9  | 8.6  | 3.3 |
|         | 11 | 9  | PZE_109085253 | 133933          | 68.1  | 14.6 | 5.4 |
|         | 12 | 10 | PZE_110013838 | 12922           | 35.9  | 10.4 | 4.2 |

**Table S10 Results of the QTL detection in the dent design using the LDLA – 1-marker model.** For each detected QTL, we showed its genetic position on the dent consensus map, its confidence interval, its level of significance and the partial percentage of variance explained. We also showed the name of one of the markers located at the detected position and their range of physical position(s) on the B73 v2 genome (Gore et al. 2009).

| Trait                      | Nb | Chr | Marker        | Physical position (kb) | Genetic position (cM) | $-\log_{10}(p)$ | $R^2$ (%) |
|----------------------------|----|-----|---------------|------------------------|-----------------------|-----------------|-----------|
| DMC (%)                    | 1  | 1   | PZE_101043094 | 29355                  | 43.3                  | 8.5             | 2.6       |
|                            | 2  | 2   | PZE_102015152 | 6459                   | 20.9                  | 15.3            | 5.1       |
|                            | 3  | 2   | PZE_102150016 | 196649                 | 94                    | 6.9             | 2.0       |
|                            | 4  | 3   | PZE_103038375 | 33073                  | 45.8                  | 14.2            | 4.7       |
|                            | 5  | 4   | PZE_104077580 | 151818                 | 57                    | 8.5             | 2.6       |
|                            | 6  | 5   | PZE_105043990 | 31444                  | 54.4                  | 9.7             | 3.0       |
|                            | 7  | 6   | PZE_106020569 | 16293                  | 9.3                   | 6.4             | 1.9       |
|                            | 8  | 6   | PZE_106092387 | 148530                 | 72                    | 6.3             | 1.8       |
|                            | 9  | 8   | PZE_108054499 | 97030                  | 50.2                  | 9.8             | 3.1       |
|                            | 10 | 8   | PZE_108104357 | 159498                 | 81.9                  | 5.6             | 1.6       |
|                            | 11 | 9   | PZE_109098884 | 143900                 | 78.9                  | 9.8             | 3.1       |
|                            | 12 | 10  | PZE_110073412 | 130077                 | 53.5                  | 8.5             | 2.6       |
| DMY (dt.ha <sup>-1</sup> ) | 1  | 3   | PZE_103115334 | 175353                 | 78.1                  | 9.0             | 3.6       |
|                            | 2  | 3   | PZE_103162977 | 213416                 | 117.8                 | 9.0             | 3.7       |
|                            | 3  | 6   | PZE_106031833 | 74460                  | 14.6                  | 14.0            | 6.0       |
|                            | 4  | 7   | PZE_107026145 | 29198                  | 41.6                  | 7.7             | 3.0       |
|                            | 5  | 8   | PZE_108054494 | 97029                  | 50.5                  | 10.4            | 4.3       |
| DtSILK (d)                 | 1  | 1   | PZE_101032230 | 19696                  | 37.8                  | 8.8             | 2.4       |
|                            | 2  | 1   | PZE_101076734 | 60701                  | 61                    | 11.4            | 3.3       |
|                            | 3  | 2   | PZE_102150016 | 196649                 | 94                    | 8.9             | 2.5       |
|                            | 4  | 3   | PZE_103104448 | 165863                 | 71.3                  | 15.7            | 4.7       |
|                            | 5  | 3   | PZE_103132614 | 188530                 | 91.1                  | 8.1             | 2.2       |
|                            | 6  | 5   | PZE_105054634 | 51432                  | 55.4                  | 6.4             | 1.7       |
|                            | 7  | 6   | PZE_106092387 | 148530                 | 72                    | 13.8            | 4.1       |
|                            | 8  | 7   | PZE_107023943 | 25471                  | 43.9                  | 13.0            | 3.8       |
|                            | 9  | 8   | PZE_108026961 | 27634                  | 45.5                  | 5.7             | 1.5       |
|                            | 10 | 8   | PZE_108063387 | 113292                 | 57.3                  | 10.1            | 2.9       |
|                            | 11 | 10  | PZE_110062675 | 117753                 | 50.1                  | 6.9             | 1.8       |
| DtTAS(d)                   | 1  | 1   | PZE_101035341 | 23055                  | 39.2                  | 13.3            | 4.6       |
|                            | 2  | 3   | PZE_103104448 | 165863                 | 71.3                  | 26.8            | 10.1      |
|                            | 3  | 6   | PZE_106092387 | 148530                 | 72                    | 5.8             | 1.8       |
|                            | 4  | 7   | PZE_107061937 | 118305                 | 50.8                  | 6.8             | 2.1       |
|                            | 5  | 7   | PZE_107100713 | 155251                 | 79.6                  | 6.7             | 2.1       |
|                            | 6  | 8   | PZE_108057325 | 102454                 | 51.5                  | 22.5            | 8.3       |
|                            | 7  | 9   | PZE_109071914 | 116752                 | 59.8                  | 7.3             | 2.3       |

---

|         |    |    |               |        |       |      |     |
|---------|----|----|---------------|--------|-------|------|-----|
| PH (cm) | 1  | 1  | PZE_101132469 | 170852 | 80.9  | 6.5  | 1.9 |
|         | 2  | 1  | PZE_101191970 | 238427 | 127.1 | 8.4  | 2.6 |
|         | 3  | 2  | PZE_102068532 | 46438  | 61.8  | 6.8  | 2.0 |
|         | 4  | 3  | PZE_103104448 | 165863 | 71.3  | 6.0  | 1.7 |
|         | 5  | 4  | PZE_104082879 | 156995 | 61.4  | 6.0  | 1.7 |
|         | 6  | 6  | PZE_106040890 | 89137  | 19.4  | 19.4 | 6.7 |
|         | 7  | 7  | PZE_107084200 | 139526 | 76.4  | 15.9 | 5.4 |
|         | 8  | 8  | PZE_108014288 | 14088  | 32    | 15.9 | 5.4 |
|         | 9  | 9  | PZE_109080822 | 128851 | 65.9  | 18.5 | 6.4 |
|         | 10 | 10 | PZE_110009551 | 7563   | 29.4  | 6.3  | 1.8 |

---



**Table S11 Results of the QTL detection in the joint analysis using the connected model.** For each detected QTL, we showed its genetic position on the dent-flint consensus map, its confidence interval, its level of significance and the partial percentage of variance explained. We also showed the name of one of the markers located at the detected position and their range of physical position(s) on the B73 v2 genome (Gore et al. 2009).

| Trait         | Nb | Chr | Marker        | Physical position (kb) | Genetic position (cM) | $-\log_{10}(p)$ | R <sup>2</sup> (%) |
|---------------|----|-----|---------------|------------------------|-----------------------|-----------------|--------------------|
| DMC (%)       | 1  | 1   | PZE_101032230 | 19696 - 19975          | 41.3                  | 8.5             | 2.3                |
|               | 2  | 1   | PZE_101103995 | 104611 - 113689        | 93.3                  | 5.2             | 1.7                |
|               | 3  | 1   | PZE_101202934 | 251103 - 251159        | 160.4                 | 4.5             | 1.6                |
|               | 4  | 1   | PZE_101247063 | 292581                 | 200.4                 | 4.3             | 1.5                |
|               | 5  | 2   | PZE_102012595 | 5556                   | 17.2                  | 21.4            | 4.5                |
|               | 6  | 2   | PZE_102178263 | 220854                 | 131.3                 | 6.9             | 2                  |
|               | 7  | 3   | PZE_103033638 | 26310 - 30050          | 45.4                  | 9.3             | 2.5                |
|               | 8  | 3   | PZE_103100449 | 160755                 | 65.5                  | 7.5             | 2.1                |
|               | 9  | 4   | PZE_104032843 | 40344 - 65470          | 54.6                  | 13.8            | 3.3                |
|               | 10 | 4   | PZE_104143137 | 231732                 | 130.7                 | 4.4             | 1.6                |
|               | 11 | 5   | PZE_105025123 | 12581                  | 42.6                  | 17.6            | 3.8                |
|               | 12 | 6   | PZE_106005094 | 6514                   | 6.3                   | 10.1            | 2.6                |
|               | 13 | 6   | PZE_106082658 | 139918 - 142454        | 66                    | 11.8            | 2.9                |
|               | 14 | 7   | PZE_107012564 | 9201                   | 33.9                  | 4.7             | 1.6                |
|               | 15 | 8   | PZE_108063387 | 112547 - 113298        | 63.4                  | 21.7            | 4.5                |
|               | 16 | 9   | PZE_109010670 | 11079 - 11504          | 30.8                  | 3.9             | 1.5                |
|               | 17 | 9   | PZE_109096248 | 141983                 | 82.5                  | 5.4             | 1.7                |
|               | 18 | 10  | PZE_110047687 | 89209 - 111680         | 47.7                  | 68.5            | 12.5               |
| DMY (dt.ha-1) | 1  | 1   | PZE_101145302 | 188026 - 188087        | 109.4                 | 12.2            | 3.6                |
|               | 2  | 1   | PZE_101215394 | 266047                 | 170.9                 | 10.4            | 3.2                |
|               | 3  | 2   | PZE_102013856 | 5997 - 6049            | 18.5                  | 5.2             | 2.1                |
|               | 4  | 2   | PZE_102066516 | 44332                  | 67.4                  | 7.2             | 2.6                |
|               | 5  | 3   | PZE_103010658 | 5853                   | 21.6                  | 7.6             | 2.6                |
|               | 6  | 3   | PZE_103098655 | 158895 - 161562        | 65.7                  | 9.5             | 3.1                |
|               | 7  | 3   | PZE_103162977 | 213416                 | 120.4                 | 5.3             | 2.1                |
|               | 8  | 4   | PZE_104025845 | 28986 - 32061          | 51.5                  | 13.5            | 3.9                |
|               | 9  | 5   | PZE_105103128 | 155811 - 160460        | 78                    | 8.8             | 2.9                |
|               | 10 | 6   | PZE_106037747 | 81440 - 86559          | 18.3                  | 9.9             | 3.1                |
|               | 11 | 6   | PZE_106050075 | 99944                  | 34                    | 11.4            | 3.4                |
|               | 12 | 6   | PZE_106106971 | 156749                 | 88.4                  | 9.2             | 3                  |
|               | 13 | 7   | PZE_107025551 | 28013 - 100690         | 44.8                  | 8.3             | 2.8                |
|               | 14 | 7   | PZE_107127637 | 170111 - 170248        | 119.3                 | 5.9             | 2.3                |
|               | 15 | 8   | PZE_108060398 | 107884 - 111781        | 62.1                  | 12.1            | 3.6                |
|               | 16 | 10  | PZE_110043381 | 82670 - 84599          | 43.2                  | 38.6            | 8.9                |
| DtSILK (d)    | 1  | 1   | PZE_101005770 | 4452 - 4610            | 9.4                   | 6.4             | 1.8                |

|          |    |    |               |                 |       |      |      |
|----------|----|----|---------------|-----------------|-------|------|------|
|          | 2  | 1  | PZE_101034085 | 21984 - 21992   | 42.7  | 10   | 2.3  |
|          | 3  | 1  | PZE_101105390 | 102985 - 118116 | 93.6  | 19.2 | 3.7  |
|          | 4  | 1  | PZE_101195591 | 244158 - 244596 | 155.9 | 11.2 | 2.5  |
|          | 5  | 2  | PZE_102161485 | 206123 - 207224 | 123   | 13.3 | 2.8  |
|          | 6  | 3  | PZE_103098655 | 158895 - 161562 | 65.7  | 12.7 | 2.7  |
|          | 7  | 3  | PZE_103128597 | 185274 - 187610 | 93.2  | 9.1  | 2.2  |
|          | 8  | 4  | PZE_104025181 | 29345 - 30933   | 51.8  | 22.8 | 4.2  |
|          | 9  | 5  | PZE_105050638 | 42662 - 51518   | 61.2  | 16.8 | 3.3  |
|          | 10 | 6  | PZE_106097991 | 151792          | 77.3  | 11.7 | 2.6  |
|          | 11 | 7  | PZE_107072354 | 128648 - 128709 | 68.9  | 14.8 | 3.1  |
|          | 12 | 8  | PZE_108061059 | 107884 - 109378 | 60.7  | 27.9 | 5    |
|          | 13 | 9  | PZE_109010476 | 11398           | 30.3  | 11.4 | 2.5  |
|          | 14 | 9  | PZE_109094832 | 141175          | 82.6  | 5.1  | 1.6  |
|          | 15 | 10 | PZE_110047800 | 89438 - 106051  | 47.4  | 93   | 15.2 |
| DtTAS(d) | 1  | 1  | PZE_101033489 | 21569 - 22464   | 43    | 12.1 | 2.5  |
|          | 2  | 1  | PZE_101140981 | 182104 - 184245 | 105   | 41.4 | 6.6  |
|          | 3  | 1  | PZE_101216412 | 267537 - 267568 | 171.5 | 12.3 | 2.5  |
|          | 4  | 3  | PZE_103098655 | 158895 - 161562 | 65.7  | 30.9 | 5.1  |
|          | 5  | 3  | PZE_103152007 | 205694          | 109.8 | 11.3 | 2.4  |
|          | 6  | 4  | PZE_104022348 | 23525 - 25988   | 49.6  | 25.7 | 4.4  |
|          | 7  | 5  | PZE_105059330 | 58137 - 72409   | 66    | 29.1 | 4.9  |
|          | 8  | 5  | PZE_105138874 | 193728          | 108.2 | 7.8  | 1.9  |
|          | 9  | 6  | PZE_106090469 | 147428          | 71.3  | 6.8  | 1.7  |
|          | 10 | 7  | PZE_107040665 | 66316 - 171898  | 75.4  | 13.6 | 2.7  |
|          | 11 | 7  | PZE_107130789 | 171926          | 126.3 | 6.2  | 1.6  |
|          | 12 | 8  | PZE_108018453 | 18973           | 42.2  | 11.8 | 2.4  |
|          | 13 | 8  | PZE_108070788 | 123843          | 69.2  | 20.3 | 3.6  |
|          | 14 | 9  | PZE_109020361 | 20598 - 20829   | 47.7  | 10.7 | 2.3  |
|          | 15 | 9  | PZE_109089874 | 137784          | 78    | 10.3 | 2.2  |
|          | 16 | 9  | PZE_109119196 | 153947          | 120.8 | 6.8  | 1.7  |
|          | 17 | 10 | PZE_110050293 | 94969 - 106961  | 47.5  | 77   | 12   |
| PH (cm)  | 1  | 1  | PZE_101021455 | 12363           | 29.3  | 5.1  | 1.4  |
|          | 2  | 1  | PZE_101106839 | 111278 - 150672 | 93.9  | 20.8 | 3.7  |
|          | 3  | 1  | PZE_101184213 | 229073          | 145.9 | 13.7 | 2.7  |
|          | 4  | 2  | PZE_102011812 | 5379            | 17.1  | 5.9  | 1.6  |
|          | 5  | 2  | PZE_102076989 | 59015 - 62213   | 74.2  | 20.2 | 3.6  |
|          | 6  | 2  | PZE_102169349 | 212884          | 128.1 | 9.6  | 2.1  |
|          | 7  | 3  | PZE_103017768 | 10455           | 33.7  | 8.1  | 1.9  |
|          | 8  | 3  | PZE_103132826 | 188571 - 188925 | 94.8  | 11.8 | 2.5  |
|          | 9  | 3  | PZE_103175533 | 221582 - 221583 | 135.2 | 7.1  | 1.8  |
|          | 10 | 4  | PZE_104022152 | 23948 - 24979   | 49.7  | 13.8 | 2.7  |
|          | 11 | 4  | PZE_104132688 | 215436 - 227111 | 120.7 | 9    | 2    |

|    |    |               |                 |       |      |      |
|----|----|---------------|-----------------|-------|------|------|
| 12 | 5  | PZE_105084182 | 101590 - 150275 | 73.1  | 9.6  | 2.1  |
| 13 | 5  | PZE_105152260 | 203315          | 120.3 | 7.4  | 1.8  |
| 14 | 6  | PZE_106049618 | 98629           | 30.4  | 21.2 | 3.8  |
| 15 | 7  | PZE_107072030 | 128141 - 128146 | 66.4  | 18   | 3.3  |
| 16 | 7  | PZE_107126258 | 168905          | 115.7 | 10.4 | 2.3  |
| 17 | 8  | PZE_108009237 | 9875            | 25.6  | 7.3  | 1.8  |
| 18 | 8  | PZE_108056704 | 101776 - 102656 | 57    | 8.1  | 1.9  |
| 19 | 8  | PZE_108096469 | 152593 - 153140 | 85.5  | 17.3 | 3.2  |
| 20 | 9  | PZE_109077113 | 124694 - 130885 | 70.9  | 19.7 | 3.6  |
| 21 | 10 | PZE_110047799 | 89438 - 97551   | 46.6  | 77.4 | 12.2 |

---
