# Supplementary material
Source: PubMed Central journal article supplement (PMC4256782)
Supplement: supp_114.169367_FigureS7.pdf [file supp_114.169367_FigureS7.pdf]

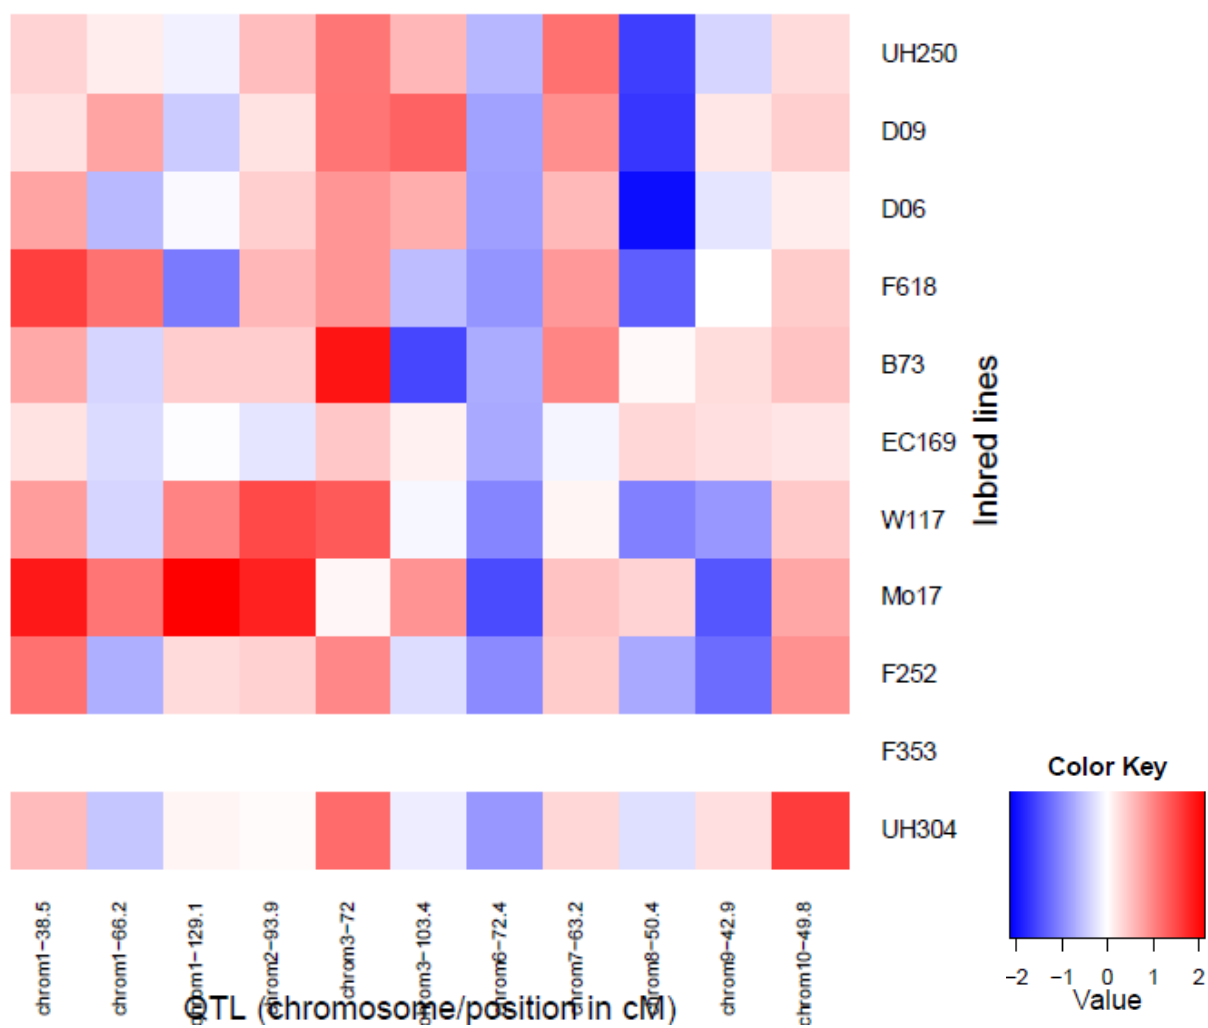

**Figure S7** Allelic effects for the different dent lines for the QTL detected for DtSILK with the connected model. Allelic effects are estimated in contrast to the central line allelic effect (F353), which was set to zero.
