# Supplementary material
Source: PubMed Central journal article supplement (PMC4256782)
Supplement: supp_114.169367_FigureS10.pdf [file supp_114.169367_FigureS10.pdf]

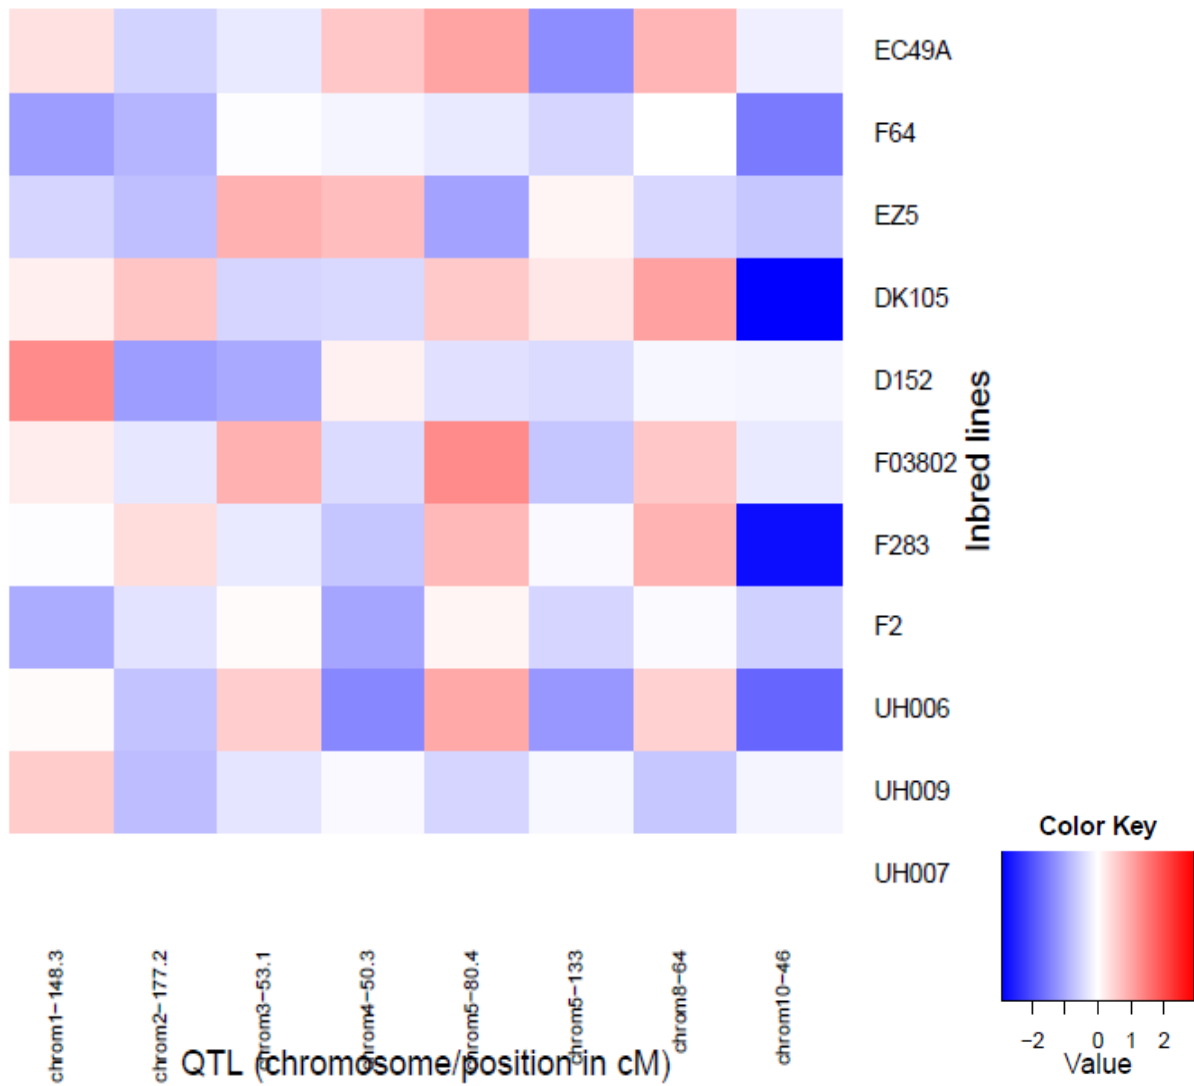

**Figure S10** Allelic effects for the different flint lines for the QTL detected for DMC with the connected model. Allelic effects are estimated in contrast to the central line allelic effect (F353), which was set to zero. Allelic effects estimated for EP44 were not shown because the population where it segregates was too small (17 individuals) to obtain a reliable estimation.
