# Supplementary material
Source: PubMed Central journal article supplement (PMC4256782)
Supplement: supp_114.169367_TableS1.pdf [file supp_114.169367_TableS1.pdf]

**Table S1** Composition of the dent and flint designs with the number of DH lines in each family which were used for obtaining the consensus maps and the one which were phenotyped.

| <b>Dent design</b> |                 |                  | <b>Flint design</b> |                 |                  |
|--------------------|-----------------|------------------|---------------------|-----------------|------------------|
| Central line F353  |                 |                  | Central line UH007  |                 |                  |
| Founder            | Genotyped lines | Phenotyped lines | Founder             | Genotyped lines | Phenotyped lines |
| B73                | 73              | 64               | D152                | 112             | 72               |
| D06                | 103             | 99               | EC49A               | 53              | 29               |
| D09                | 105             | 100              | EP44                | 34 <sup>a</sup> | 17               |
| EC169              | 77              | 66               | EZ5                 | 50              | 26               |
| F252               | 105             | 96               | F03802              | 129             | 129              |
| F618               | 108             | 104              | F2                  | 77              | 54               |
| Mo17               | 63              | 53               | F283                | 134             | 133              |
| UH250              | 99              | 94               | F64                 | 108             | 64               |
| UH304              | 86              | 81               | UH006               | 114             | 94               |
| W117               | 100             | 84               | UH009               | 117             | 98               |
|                    |                 |                  | DK105               | 115             | 95               |
| <b>Total</b>       | <b>919</b>      | <b>841</b>       | <b>Total</b>        | <b>1009</b>     | <b>811</b>       |

<sup>a</sup> Population not used for mapping as too small
