# Supplementary material
Source: PubMed Central journal article supplement (PMC4256782)
Supplement: supp_114.169367_TableS2.pdf [file supp_114.169367_TableS2.pdf]

**Table S2** Threshold values for the  $-\log(p\text{-value})$  for all the models and traits for the dent and flint groups and for the joint connected study.

|                              | DMC  | DMY  | DtSILK | DtTAS | PH   | Mean        |
|------------------------------|------|------|--------|-------|------|-------------|
| Dent                         |      |      |        |       |      |             |
| Connected                    | 3.71 | 3.91 | 3.88   | 4.11  | 3.83 | <b>3.89</b> |
| LDLA - 5cM                   | 4.18 | 4.38 | 4.62   | 4.87  | 4.42 | <b>4.49</b> |
| LDLA - 2cM                   | 4.26 | 4.46 | 4.61   | 4.94  | 4.50 | <b>4.55</b> |
| LDLA – 1-marker <sup>a</sup> | 5.64 | 5.64 | 5.64   | 5.64  | 5.64 | <b>5.64</b> |
| Flint                        |      |      |        |       |      |             |
| Connected                    | 3.43 | 3.65 | 4.15   | 4.37  | 3.83 | <b>3.89</b> |
| LDLA - 5cM                   | 4.07 | 4.20 | 4.84   | 5.13  | 4.53 | <b>4.55</b> |
| LDLA - 2cM                   | 4.30 | 4.36 | 5.04   | 5.23  | 4.60 | <b>4.71</b> |
| LDLA – 1-marker <sup>a</sup> | 5.61 | 5.61 | 5.61   | 5.61  | 5.61 | <b>5.61</b> |
| Joint                        |      |      |        |       |      |             |
| Connected                    | 3.49 | 3.94 | 4.02   | 4.85  | 3.74 | <b>4.00</b> |

<sup>a</sup>The threshold value for the LDLA – 1-marker corresponded to a Bonferroni threshold for a genome-wide risk of 10 %. The other thresholds were calculated using 5,000 intra-family permutations of the phenotypes for a type I risk of 10 % across all families and the total genome.
