# Supplementary material
Source: PubMed Central journal article supplement (PMC4256782)
Supplement: supp_114.169367_TableS3.pdf [file supp_114.169367_TableS3.pdf]

**Table S3 Results of the QTL detection in the flint design using the connected model.** For each detected QTL, we showed its genetic position on the flint consensus map, its confidence interval, its level of significance and the partial percentage of variance explained. We also showed the name of one of the markers located at the detected position and their range of physical position(s) on the B73 v2 genome (Gore et al. 2009).

| Trait      | Nb | Chr | Marker        | Physical position (kb) | Genetic position (cM) | Confidence interval | -log10(p) | R <sup>2</sup> (%) |
|------------|----|-----|---------------|------------------------|-----------------------|---------------------|-----------|--------------------|
| DMC (%)    | 1  | 1   | PZE_101172677 | 216581                 | 148.3                 | 142-149             | 5.4       | 3.2                |
|            | 2  | 2   | PZE_102191415 | 234096                 | 177.2                 | 176-181             | 6.6       | 3.6                |
|            | 3  | 3   | PZE_103033917 | 26445 - 138643         | 53.1                  | 53-58               | 5.1       | 3                  |
|            | 4  | 4   | PZE_104021549 | 18916 - 23142          | 50.3                  | 49-55               | 6.7       | 3.7                |
|            | 5  | 5   | PZE_105085637 | 107137 - 138073        | 80.4                  | 79-84               | 9.8       | 4.9                |
|            | 6  | 5   | PZE_105150268 | 201762                 | 133                   | 129-138             | 5.3       | 3.1                |
|            | 7  | 8   | PZE_108060399 | 107884 - 113068        | 64                    | 50-65               | 7.4       | 4                  |
|            | 8  | 10  | PZE_110049849 | 93025 - 115573         | 46                    | 46-49               | 59.6      | 26.5               |
| <b>DMY</b> |    |     |               |                        |                       |                     |           |                    |
| (dt.ha-1)  | 1  | 1   | PZE_101038989 | 25879 - 26917          | 52.5                  | 52-54               | 7.4       | 3.8                |
|            | 2  | 1   | PZE_101147651 | 191513                 | 118.9                 | 117-120             | 14.4      | 6.4                |
|            | 3  | 2   | PZE_102152279 | 198891                 | 129.6                 | 127-141             | 8.5       | 4.2                |
|            | 4  | 3   | PZE_103137887 | 191279 - 196563        | 100.1                 | 96-101              | 12.4      | 5.7                |
|            | 5  | 4   | PZE_104021283 | 22836                  | 54.9                  | 54-57               | 12.1      | 5.6                |
|            | 6  | 4   | PZE_104152609 | 237454 - 237702        | 153.3                 | 127-154             | 4.5       | 2.7                |
|            | 7  | 5   | PZE_105078335 | 88752 - 139163         | 82.1                  | 81-85               | 8.1       | 4.1                |
|            | 8  | 6   | PZE_106097864 | 151579                 | 83.5                  | 82-84               | 9.5       | 4.6                |
|            | 9  | 7   | PZE_107127708 | 170248                 | 126.7                 | 123-131             | 5.5       | 3.1                |
|            | 10 | 8   | PZE_108105216 | 159953                 | 94.1                  | 92-111              | 6         | 3.2                |
|            | 11 | 10  | PZE_110047350 | 88553 - 97551          | 44.6                  | 44-45               | 34.2      | 14.2               |
| DtSILK (d) | 1  | 1   | PZE_101005818 | 4452                   | 10.3                  | 9-12                | 6.9       | 2.2                |
|            | 2  | 1   | PZE_101143233 | 184616                 | 113.9                 | 101-115             | 26.3      | 6.7                |
|            | 3  | 1   | PZE_101181658 | 226175                 | 153.1                 | 148 -198            | 4.6       | 1.6                |
|            | 4  | 2   | PZE_102129781 | 178613 - 179981        | 102.1                 | 101-162             | 5.4       | 1.8                |
|            | 5  | 3   | PZE_103121610 | 69965 - 179545         | 79.5                  | 61-80               | 6.8       | 2.1                |
|            | 6  | 4   | PZE_104027603 | 23555 - 38027          | 55.1                  | 52-57               | 31.8      | 8                  |
|            | 7  | 5   | PZE_105033399 | 17477 - 18623          | 59.8                  | 54-60               | 6.7       | 2.1                |
|            | 8  | 5   | PZE_105093579 | 135624 - 150088        | 84.2                  | 80-86               | 7.3       | 2.2                |
|            | 9  | 5   | PZE_105163109 | 204822 - 205566        | 138.6                 | 132-140             | 5.3       | 1.8                |
|            | 10 | 6   | PZE_106049962 | 99771                  | 33.4                  | 27-42               | 8         | 2.4                |
|            | 11 | 7   | PZE_107130719 | 171824                 | 131.5                 | 125-133             | 5.6       | 1.9                |
|            | 12 | 8   | PZE_108067425 | 119151                 | 68.4                  | 65-91               | 5.3       | 1.8                |
|            | 13 | 8   | PZE_108135936 | 175699 - 175734        | 139.7                 | 117-140             | 6.1       | 2                  |
|            | 14 | 9   | PZE_109009942 | 11080 - 11080          | 31.3                  | 31-32               | 13        | 3.5                |

|           |    |    |               |                 |       |         |      |      |
|-----------|----|----|---------------|-----------------|-------|---------|------|------|
|           | 15 | 10 | PZE_110049100 | 91959 - 127347  | 49.7  | 49-50   | 94.6 | 27.5 |
| DtTAS (d) | 1  | 1  | PZE_101005766 | 4609            | 10.8  | 9-13    | 6.8  | 2.5  |
|           | 2  | 1  | PZE_101108474 | 115220 - 161708 | 103   | 100-103 | 31.7 | 9    |
|           | 3  | 1  | PZE_101198020 | 246399 - 250557 | 173.3 | 164-175 | 6.2  | 2.3  |
|           | 4  | 3  | PZE_103098655 | 158895          | 67.4  | 67-68   | 9    | 3    |
|           | 5  | 3  | PZE_103153521 | 206703          | 114.1 | 110-115 | 8.5  | 2.9  |
|           | 6  | 4  | PZE_104025625 | 30431 - 37023   | 57    | 52-57   | 27.6 | 7.9  |
|           | 7  | 5  | PZE_105068746 | 71898 - 87721   | 78.6  | 78-79   | 21.6 | 6.3  |
|           | 8  | 6  | PZE_106061581 | 111966 - 112514 | 47.3  | 46-49   | 8.5  | 2.9  |
|           | 9  | 7  | PZE_107127708 | 170248          | 126.7 | 124-130 | 8.5  | 2.9  |
|           | 10 | 8  | PZE_108066752 | 118422 - 119082 | 68.3  | 68-69   | 15   | 4.6  |
|           | 11 | 9  | PZE_109007521 | 8233            | 23.3  | 23-38   | 7.6  | 2.6  |
|           | 12 | 10 | PZE_110048157 | 90243 - 122268  | 48.7  | 46-49   | 62.7 | 18.6 |
| PH (cm)   | 1  | 1  | PZE_101127891 | 162428 - 178788 | 108.7 | 108-109 | 12.7 | 5.4  |
|           | 2  | 2  | PZE_102074552 | 39031 - 55241   | 78    | 18-85   | 9    | 4.1  |
|           | 3  | 2  | PZE_102169535 | 213168          | 143.9 | 140-145 | 6.9  | 3.3  |
|           | 4  | 4  | PZE_104022475 | 23556 - 24765   | 57.2  | 55-60   | 12   | 5.1  |
|           | 5  | 5  | PZE_105151348 | 202416          | 134.5 | 132-136 | 6.4  | 3.2  |
|           | 6  | 7  | PZE_107061937 | 118305          | 58.2  | 53-62   | 4.9  | 2.6  |
|           | 7  | 7  | PZE_107128331 | 170536          | 128.5 | 121-129 | 7.2  | 3.4  |
|           | 8  | 8  | PZE_108098736 | 155052          | 87.2  | 87-92   | 17.8 | 7.1  |
|           | 9  | 10 | PZE_110048157 | 90243 - 122268  | 48.7  | 46-49   | 55.4 | 21.7 |
