# Supplementary material
Source: PubMed Central journal article supplement (PMC4256782)
Supplement: supp_114.169367_TableS4.pdf [file supp_114.169367_TableS4.pdf]

**Table S4 Results of the QTL detection in the flint design using the LDLA – 5 cM model.** For each detected QTL, we showed its genetic position on the flint consensus map, its confidence interval, its level of significance and the partial percentage of variance explained. We also showed the name of one of the markers located at the detected position and their range of physical position(s) on the B73 v2 genome (Gore et al. 2009).

| Trait                      | Nb | Chr | Marker        | Physical position (kb) | Genetic position |           |                    |
|----------------------------|----|-----|---------------|------------------------|------------------|-----------|--------------------|
|                            |    |     |               |                        | (cM)             | -log10(p) | R <sup>2</sup> (%) |
| DMC (%)                    | 1  | 1   | PZE_101147104 | 190602                 | 119.4            | 7.3       | 2.9                |
|                            | 2  | 1   | PZE_101250881 | 295590                 | 225.9            | 5.6       | 2.2                |
|                            | 3  | 2   | PZE_102025627 | 11947                  | 39.2             | 7         | 1.8                |
|                            | 4  | 2   | PZE_102046822 | 24366                  | 63.7             | 7.3       | 3.4                |
|                            | 5  | 2   | PZE_102183284 | 225854                 | 157.9            | 8         | 3                  |
|                            | 6  | 4   | PZE_104021283 | 22836                  | 54.9             | 11.2      | 4.8                |
|                            | 7  | 5   | PZE_105085637 | 107137 - 138073        | 80.4             | 10.2      | 4.3                |
|                            | 8  | 5   | PZE_105165365 | 208891 - 209048        | 148.7            | 5.2       | 1.6                |
|                            | 9  | 6   | PZE_106076029 | 131411 - 134098        | 64.2             | 4.9       | 2.3                |
|                            | 10 | 8   | PZE_108018911 | 18447                  | 43.1             | 7.5       | 2.9                |
|                            | 11 | 10  | PZE_110049849 | 93025 - 115573         | 46               | 70.2      | 29.2               |
| DMY (dt.ha <sup>-1</sup> ) | 1  | 1   | PZE_101147651 | 191513                 | 118.9            | 13.3      | 5.7                |
|                            | 2  | 1   | PZE_101213494 | 263732                 | 185.2            | 5.7       | 2.6                |
|                            | 3  | 3   | PZE_103098382 | 158668 - 159808        | 66.8             | 7.9       | 4.1                |
|                            | 4  | 4   | PZE_104020618 | 21905                  | 55               | 13.5      | 6.3                |
|                            | 5  | 4   | PZE_104123129 | 200190                 | 129.8            | 5.3       | 2.9                |
|                            | 6  | 5   | PZE_105068572 | 71700 - 72614          | 75.9             | 6.9       | 3.7                |
|                            | 7  | 6   | PZE_106107736 | 156986                 | 95.6             | 4.3       | 1.2                |
|                            | 8  | 7   | PZE_107128866 | 170819                 | 127.8            | 10        | 3.5                |
|                            | 9  | 8   | PZE_108029326 | 27221 - 66473          | 50.1             | 6.6       | 3.4                |
|                            | 10 | 10  | PZE_110045930 | 86778 - 109582         | 46.3             | 31.3      | 14.3               |
| DtSILK (d)                 | 1  | 1   | PZE_101005818 | 4452                   | 10.3             | 5.2       | 1.2                |
|                            | 2  | 1   | PZE_101146834 | 190143                 | 119.1            | 34.3      | 8.1                |
|                            | 3  | 1   | PZE_101199192 | 248322                 | 171.8            | 15        | 3.9                |
|                            | 4  | 2   | PZE_102179704 | 222468                 | 154.6            | 10.1      | 2.4                |
|                            | 5  | 3   | PZE_103098382 | 158668 - 159808        | 66.8             | 8.2       | 2.4                |
|                            | 6  | 3   | PZE_103121610 | 69965 - 179545         | 79.5             | 7.8       | 2                  |
|                            | 7  | 4   | PZE_104062511 | 44504 - 124929         | 62.6             | 31.7      | 8.1                |
|                            | 8  | 5   | PZE_105078445 | 86146 - 140781         | 80.7             | 18.6      | 4.7                |
|                            | 9  | 5   | PZE_105153835 | 204326 - 205504        | 137.6            | 10.9      | 2.4                |
|                            | 10 | 7   | PZE_107133704 | 173181                 | 139.3            | 7.6       | 1.6                |
|                            | 11 | 8   | PZE_108066557 | 118189                 | 68.7             | 7.4       | 1.9                |
|                            | 12 | 8   | PZE_108133033 | 173617                 | 133.8            | 6.6       | 1.1                |
|                            | 13 | 9   | PZE_109009936 | 11079                  | 31.6             | 11.6      | 2.8                |

|           |    |    |               |                 |       |      |      |
|-----------|----|----|---------------|-----------------|-------|------|------|
|           | 14 | 10 | PZE_110048157 | 90243 - 122268  | 48.7  | 98.7 | 29.1 |
| DtTAS (d) | 1  | 1  | PZE_101005765 | 4609            | 10    | 6.5  | 1.8  |
|           | 1  | 1  | PZE_101109004 | 116312 - 158005 | 105.3 | 7.3  | 2.5  |
|           | 2  | 1  | PZE_101147104 | 190602          | 119.4 | 6.9  | 2.2  |
|           | 3  | 1  | PZE_101213102 | 263154          | 185.3 | 9    | 2.7  |
|           | 4  | 3  | PZE_103098655 | 158895          | 67.4  | 8.9  | 2.7  |
|           | 5  | 3  | PZE_103158635 | 210426          | 116.9 | 7.7  | 2.2  |
|           | 6  | 4  | PZE_104044703 | 33362 - 96313   | 60.7  | 21.6 | 6.8  |
|           | 7  | 5  | PZE_105066936 | 69125 - 83278   | 77.8  | 21.9 | 6.5  |
|           | 8  | 7  | PZE_107136925 | 174718          | 144.3 | 5.7  | 1.3  |
|           | 9  | 8  | PZE_108019174 | 18351           | 42.8  | 6.8  | 2    |
|           | 10 | 8  | PZE_108073574 | 128549 - 128753 | 75.2  | 13.4 | 3.9  |
|           | 11 | 9  | PZE_109009220 | 10008 - 10009   | 28.4  | 9.5  | 2.4  |
|           | 12 | 10 | PZE_110048157 | 90243 - 122268  | 48.7  | 58.1 | 18.3 |
|           | 13 | 1  | PZE_101005765 | 4609            | 10    | 6.5  | 1.8  |
| PH (cm)   | 1  | 1  | PZE_101146427 | 189406          | 118.5 | 14.7 | 5.2  |
|           | 2  | 2  | PZE_102074552 | 39031 - 55241   | 78    | 9.3  | 3.8  |
|           | 3  | 2  | PZE_102173058 | 216192          | 146.8 | 7.4  | 2.9  |
|           | 4  | 4  | PZE_104045760 | 68246 - 68323   | 58.7  | 10.6 | 4.4  |
|           | 5  | 4  | PZE_104103602 | 179801 - 180054 | 102.8 | 6.6  | 2.4  |
|           | 6  | 5  | PZE_105150122 | 201632          | 128.7 | 8.7  | 2.7  |
|           | 7  | 7  | PZE_107128144 | 170420 - 170496 | 126.6 | 11.2 | 3.2  |
|           | 8  | 8  | PZE_108092331 | 149305 - 155644 | 87.8  | 20.5 | 7.8  |
|           | 9  | 9  | PZE_109008703 | 9311            | 25.5  | 4.8  | 1.3  |
|           | 10 | 10 | PZE_110049849 | 93025 - 115573  | 46    | 56.8 | 21.7 |
