# Supplementary material
Source: PubMed Central journal article supplement (PMC4256782)
Supplement: supp_114.169367_TableS5.pdf [file supp_114.169367_TableS5.pdf]

**TableS5 Results of the QTL detection in the flint design using the LDLA – 2 cM model.** For each detected QTL, we showed its genetic position on the flint consensus map, its confidence interval, its level of significance and the partial percentage of variance explained. We also showed the name of one of the markers located at the detected position and their range of physical position(s) on the B73 v2 genome (Gore et al. 2009).

| Trait                      | Nb | Chr | Marker        | Physical position (kb) | Genetic position (cM) | -log10(p) | R <sup>2</sup> (%) |
|----------------------------|----|-----|---------------|------------------------|-----------------------|-----------|--------------------|
| DMC (%)                    | 1  | 1   | PZE_101146598 | 189773                 | 118                   | 6.2       | 2.5                |
|                            | 2  | 2   | PZE_102185359 | 229130 - 229288        | 165                   | 5         | 1.7                |
|                            | 3  | 4   | PZE_104018885 | 18916 - 23142          | 50.3                  | 6.9       | 3.4                |
|                            | 4  | 5   | PZE_105085637 | 107137 - 138073        | 80.4                  | 9.1       | 4.6                |
|                            | 5  | 5   | PZE_105163718 | 208374                 | 149.2                 | 4.5       | 1.9                |
|                            | 6  | 8   | PZE_108063241 | 113068 - 113206        | 64.1                  | 6.5       | 3.2                |
|                            | 7  | 10  | PZE_110049849 | 93025 - 115573         | 46                    | 46.5      | 20.8               |
|                            | 8  | 10  | PZE_110089009 | 139036                 | 69.9                  | 5         | 1.4                |
| DMY (dt.ha <sup>-1</sup> ) | 1  | 1   | PZE_101146427 | 189406                 | 118.5                 | 14.9      | 5.3                |
|                            | 2  | 2   | PZE_102172077 | 215135                 | 144.9                 | 6.9       | 2.5                |
|                            | 3  | 3   | PZE_103097999 | 157939                 | 65.4                  | 6         | 1.9                |
|                            | 4  | 3   | PZE_103142979 | 198520 - 198581        | 101.6                 | 4.7       | 2.5                |
|                            | 5  | 4   | PZE_104023433 | 26403 - 26403          | 52.7                  | 15.8      | 5.8                |
|                            | 6  | 4   | PZE_104122410 | 199546 - 199546        | 126.5                 | 5.4       | 2.6                |
|                            | 7  | 5   | PZE_105092759 | 133339 - 159961        | 84.4                  | 7.4       | 3.7                |
|                            | 8  | 6   | PZE_106050624 | 100745 - 103709        | 35.4                  | 4.6       | 2.2                |
|                            | 9  | 6   | PZE_106103665 | 155178                 | 90.5                  | 7.8       | 3.4                |
|                            | 10 | 7   | PZE_107128846 | 170819                 | 128.9                 | 9         | 2.9                |
|                            | 11 | 8   | PZE_108027746 | 26074 - 29164          | 49.5                  | 6.7       | 3.4                |
|                            | 12 | 10  | PZE_110047350 | 88553 - 97551          | 44.6                  | 31.7      | 13.4               |
| DtSILK (d)                 | 1  | 1   | PZE_101005818 | 4452                   | 10.3                  | 5.6       | 1.4                |
|                            | 2  | 1   | PZE_101147104 | 190602                 | 119.4                 | 33.6      | 9.2                |
|                            | 3  | 1   | PZE_101199859 | 248854 - 249092        | 173.9                 | 14.2      | 4.1                |
|                            | 4  | 2   | PZE_102181292 | 222435 - 223721        | 156.5                 | 6.3       | 1.6                |
|                            | 5  | 3   | PZE_103118006 | 176570                 | 78.5                  | 10.9      | 3                  |
|                            | 6  | 3   | PZE_103167997 | 216529                 | 126.6                 | 9.2       | 1.9                |
|                            | 7  | 4   | PZE_104044892 | 42641 - 134020         | 62.5                  | 29.6      | 8.8                |
|                            | 8  | 5   | PZE_105039522 | 24542                  | 63.6                  | 18        | 5.4                |
|                            | 9  | 8   | PZE_108133033 | 173617                 | 133.8                 | 9.2       | 2.1                |
|                            | 10 | 9   | PZE_109010021 | 11134                  | 30.1                  | 11.9      | 2.9                |
|                            | 11 | 10  | PZE_110060375 | 114622 - 114653        | 48.6                  | 89.7      | 29.6               |
| DtTAS(d)                   | 1  | 1   | PZE_101005770 | 4610                   | 10.5                  | 5.3       | 1.5                |
|                            | 2  | 1   | PZE_101109004 | 116312 - 158005        | 105.3                 | 16        | 4.7                |
|                            | 3  | 1   | PZE_101147248 | 190703                 | 121.1                 | 6.4       | 1.7                |
|                            | 4  | 1   | PZE_101213479 | 263702 - 265655        | 186.8                 | 8.9       | 2.3                |

|         |    |               |                 |                 |       |      |      |
|---------|----|---------------|-----------------|-----------------|-------|------|------|
| 5       | 3  | PZE_103109418 | 170117 - 171781 | 75.9            | 9.3   | 2.1  |      |
| 6       | 3  | PZE_103157683 | 209726          | 116.3           | 8     | 2.1  |      |
| 7       | 4  | PZE_104044703 | 33362 - 96313   | 60.7            | 24    | 7.2  |      |
| 8       | 5  | PZE_105063310 | 62822 - 82069   | 76              | 24    | 7.1  |      |
| 9       | 6  | PZE_106064975 | 117082 - 122646 | 56.3            | 6.9   | 2.2  |      |
| 10      | 7  | PZE_107128144 | 170420 - 170496 | 126.6           | 6.1   | 1.4  |      |
| 11      | 8  | PZE_108019174 | 18351           | 42.8            | 6.8   | 1.9  |      |
| 12      | 8  | PZE_108073574 | 128549 - 128753 | 75.2            | 16.7  | 4.5  |      |
| 13      | 9  | PZE_109009220 | 10008 - 10009   | 28.4            | 11.2  | 2.5  |      |
| 14      | 10 | PZE_110049001 | 89438 - 108230  | 47.2            | 61.8  | 18.8 |      |
| <hr/>   |    |               |                 |                 |       |      |      |
| PH (cm) | 1  | 1             | PZE_101144184   | 187342 - 187381 | 118.6 | 14.2 | 4.6  |
|         | 2  | 2             | PZE_102076936   | 51554 - 59013   | 83    | 9.1  | 3.7  |
|         | 3  | 2             | PZE_102175167   | 217650          | 147.7 | 8    | 2.7  |
|         | 4  | 4             | PZE_104028514   | 34558 - 80248   | 60.2  | 11.3 | 4.8  |
|         | 5  | 4             | PZE_104104676   | 180887          | 105.6 | 6.2  | 1.5  |
|         | 6  | 5             | PZE_105144284   | 198198          | 130.3 | 7.5  | 1.9  |
|         | 7  | 7             | PZE_107057864   | 111123 - 112763 | 55.4  | 6    | 2.2  |
|         | 8  | 7             | PZE_107128144   | 170420 - 170496 | 126.6 | 9.7  | 2.8  |
|         | 9  | 8             | PZE_108092331   | 149305 - 155644 | 87.8  | 18.3 | 6.6  |
|         | 10 | 9             | PZE_109008133   | 8741            | 25.8  | 5.2  | 1.5  |
|         | 11 | 10            | PZE_110049849   | 93025 - 115573  | 46    | 56   | 21.3 |
