# Supplementary material
Source: PubMed Central journal article supplement (PMC4256782)
Supplement: supp_114.169367_TableS6.pdf [file supp_114.169367_TableS6.pdf]

**Table S6 Results of the QTL detection in the flint design using the LDLA – 1-marker model.** For each detected QTL, we showed its genetic position on the flint consensus map, its confidence interval, its level of significance and the partial percentage of variance explained. We also showed the name of one of the markers located at the detected position and their range of physical position(s) on the B73 v2 genome (Gore et al. 2009).

| Trait                      | Nb | Chr | Marker        | Physical position (kb) | Genetic position (cM) | $-\log_{10}(p)$ | R <sup>2</sup> (%) |
|----------------------------|----|-----|---------------|------------------------|-----------------------|-----------------|--------------------|
| DMC (%)                    | 1  | 2   | PZE_102185353 | 229130                 | 164.2                 | 5.7             | 1.7                |
|                            | 2  | 4   | PZE_104033064 | 40693                  | 60                    | 6.7             | 2.1                |
|                            | 3  | 5   | PZE_105079359 | 90584                  | 80.6                  | 11.5            | 3.9                |
|                            | 4  | 5   | PZE_105143697 | 197846                 | 126.4                 | 5.7             | 1.7                |
|                            | 5  | 8   | PZE_108063319 | 113212                 | 63.6                  | 7.2             | 2.3                |
|                            | 6  | 10  | PZE_110050010 | 94199                  | 45.9                  | 44.3            | 18.0               |
|                            | 7  | 10  | PZE_110086343 | 137505                 | 68.9                  | 6.3             | 1.9                |
| DMY (dt.ha <sup>-1</sup> ) | 1  | 1   | PZE_101128881 | 164375                 | 105.8                 | 6.3             | 1.8                |
|                            | 2  | 1   | PZE_101144216 | 187381                 | 118.6                 | 15.6            | 5.2                |
|                            | 3  | 3   | PZE_103097999 | 157939                 | 65.4                  | 10.3            | 3.3                |
|                            | 4  | 4   | PZE_104017088 | 17150                  | 48.7                  | 11.4            | 3.7                |
|                            | 5  | 4   | PZE_104021665 | 23190                  | 51.4                  | 5.8             | 1.7                |
|                            | 6  | 4   | PZE_104122007 | 198999                 | 124                   | 6.0             | 1.7                |
|                            | 7  | 5   | PZE_105094114 | 137392                 | 81.5                  | 9.7             | 3.1                |
|                            | 8  | 6   | PZE_106104239 | 155466                 | 90.7                  | 7.8             | 2.4                |
|                            | 9  | 7   | PZE_107128846 | 170819                 | 128.9                 | 8.2             | 2.5                |
|                            | 10 | 8   | PZE_108028156 | 29898                  | 51.1                  | 9.1             | 2.9                |
|                            | 11 | 10  | PZE_110050010 | 94199                  | 45.9                  | 33.0            | 12.2               |
| DtSILK (d)                 | 1  | 1   | PZE_101004387 | 3883                   | 8.5                   | 8.2             | 1.5                |
|                            | 2  | 1   | PZE_101088198 | 79735                  | 90.5                  | 10.0            | 1.9                |
|                            | 3  | 1   | PZE_101106156 | 109635                 | 102.4                 | 17.1            | 3.6                |
|                            | 4  | 1   | PZE_101151084 | 194731                 | 125.8                 | 9.4             | 1.8                |
|                            | 5  | 1   | PZE_101200614 | 249700                 | 173.1                 | 11.3            | 2.2                |
|                            | 6  | 3   | PZE_103098779 | 158974                 | 61.9                  | 11.3            | 2.2                |
|                            | 7  | 4   | PZE_104021514 | 23073                  | 51                    | 9.0             | 1.7                |
|                            | 8  | 4   | PZE_104079162 | 153502                 | 69                    | 10.8            | 2.1                |
|                            | 9  | 4   | PZE_104152590 | 237693                 | 155.7                 | 6.4             | 1.1                |
|                            | 10 | 5   | PZE_105069912 | 74335                  | 76.8                  | 21.1            | 4.6                |
|                            | 11 | 5   | PZE_105143119 | 197706                 | 127.6                 | 5.7             | 1.0                |
|                            | 12 | 7   | PZE_107128331 | 170536                 | 128.5                 | 6.5             | 1.2                |
|                            | 13 | 8   | PZE_108070056 | 122950                 | 71                    | 12.0            | 2.4                |
|                            | 14 | 9   | PZE_109009591 | 10597                  | 30.3                  | 7.1             | 1.3                |
|                            | 15 | 10  | PZE_110016138 | 16504                  | 38.6                  | 11.2            | 2.2                |
|                            | 16 | 10  | PZE_110050010 | 94199                  | 45.9                  | 45.7            | 11.1               |
| DtTAS(d)                   | 1  | 1   | PZE_101004387 | 3883                   | 8.5                   | 6.1             | 1.2                |

|         |    |               |               |        |       |      |      |
|---------|----|---------------|---------------|--------|-------|------|------|
| 2       | 1  | PZE_101115961 | 138907        | 103.5  | 14.5  | 3.3  |      |
| 3       | 1  | PZE_101144216 | 187381        | 118.6  | 23.2  | 5.6  |      |
| 4       | 1  | PZE_101160171 | 202307        | 128    | 6.7   | 1.3  |      |
| 5       | 1  | PZE_101200614 | 249700        | 173.1  | 8.5   | 1.8  |      |
| 6       | 3  | PZE_103007349 | 4064          | 11.7   | 8.6   | 1.8  |      |
| 7       | 3  | PZE_103098779 | 158974        | 61.9   | 14.0  | 3.2  |      |
| 8       | 4  | PZE_104021514 | 23073         | 51     | 9.7   | 2.1  |      |
| 9       | 4  | PZE_104079162 | 153502        | 69     | 10.0  | 2.1  |      |
| 10      | 5  | PZE_105069912 | 74335         | 76.8   | 24.7  | 6.0  |      |
| 11      | 6  | PZE_106066817 | 119166        | 57.4   | 5.5   | 1.0  |      |
| 12      | 8  | PZE_108067255 | 118970        | 68.8   | 5.8   | 1.1  |      |
| 13      | 8  | PZE_108074213 | 129415        | 75.5   | 10.3  | 2.2  |      |
| 14      | 9  | PZE_109111133 | 151251        | 109.1  | 6.5   | 1.3  |      |
| 15      | 10 | PZE_110018448 | 22128         | 38.9   | 8.9   | 1.9  |      |
| 16      | 10 | PZE_110050010 | 94199         | 45.9   | 57.5  | 16.1 |      |
| <hr/>   |    |               |               |        |       |      |      |
| PH (cm) | 1  | 1             | PZE_101145493 | 188172 | 115.6 | 8.3  | 2.4  |
|         | 2  | 2             | PZE_102074558 | 55249  | 79.5  | 9.8  | 3.0  |
|         | 3  | 4             | PZE_104042538 | 60023  | 63.1  | 11.6 | 3.6  |
|         | 4  | 5             | PZE_105091638 | 129996 | 83.4  | 7.8  | 2.3  |
|         | 5  | 5             | PZE_105134752 | 195420 | 117.6 | 9.9  | 3.0  |
|         | 6  | 6             | PZE_106097959 | 151785 | 84.1  | 6.1  | 1.7  |
|         | 7  | 7             | PZE_107127637 | 170111 | 126.3 | 7.4  | 2.1  |
|         | 8  | 8             | PZE_108105216 | 159953 | 94.1  | 16.6 | 5.3  |
|         | 9  | 10            | PZE_110050010 | 94199  | 45.9  | 53.9 | 20.6 |
| <hr/>   |    |               |               |        |       |      |      |
