# Supplementary material
Source: PubMed Central journal article supplement (PMC4256782)
Supplement: supp_114.169367_TableS7.pdf [file supp_114.169367_TableS7.pdf]

**Table S7 Results of the QTL detection in the dent design using the connected model.** For each detected QTL, we showed its genetic position on the dent consensus map, its confidence interval, its level of significance and the partial percentage of variance explained. We also showed the name of one of the markers located at the detected position and their range of physical position(s) on the B73 v2 genome (Gore et al. 2009).

| Trait         | Nb | Chr | Marker        | Physical position (kb) | Genetic position (cM) | Confidence interval | $-\log_{10}(p)$ | R <sup>2</sup> (%) |
|---------------|----|-----|---------------|------------------------|-----------------------|---------------------|-----------------|--------------------|
| DMC (%)       | 1  | 1   | PZE_101031077 | 19101                  | 35.2                  | 32-39               | 11.7            | 4.8                |
|               | 2  | 2   | PZE_102011868 | 5425                   | 17.1                  | 16-18               | 13.4            | 5.3                |
|               | 3  | 2   | PZE_102149235 | 195177 - 197936        | 94.4                  | 88-100              | 5.4             | 2.6                |
|               | 4  | 3   | PZE_103091082 | 150173 - 165855        | 63.5                  | 58-64               | 16.8            | 6.5                |
|               | 5  | 4   | PZE_104079076 | 153406                 | 59                    | 57-61               | 10              | 4.2                |
|               | 6  | 5   | PZE_105026024 | 13303 - 13313          | 42.8                  | 42-45               | 10.6            | 4.4                |
|               | 7  | 6   | PZE_106002839 | 3588 - 3869            | 2.9                   | 1-6                 | 10.4            | 4.3                |
|               | 8  | 6   | PZE_106098045 | 151822                 | 75.1                  | 72-79               | 9.6             | 4.1                |
|               | 9  | 8   | PZE_108058161 | 103705 - 103897        | 51.3                  | 51-58               | 18              | 6.9                |
|               | 10 | 9   | PZE_109009836 | 10943                  | 29.3                  | 27-30               | 6               | 2.8                |
|               | 11 | 9   | PZE_109096235 | 141951                 | 74.4                  | 70-76               | 6.8             | 3.1                |
|               | 12 | 10  | PZE_110048796 | 91481 - 107902         | 46.4                  | 27-53               | 5.7             | 2.7                |
| DMY (dt.ha-1) | 1  | 1   | PZE_101071870 | 54342                  | 59.2                  | 57-62               | 5.7             | 3.8                |
|               | 2  | 1   | PZE_101215677 | 266310 - 266369        | 144.6                 | 123-160             | 5.5             | 3.7                |
|               | 3  | 3   | PZE_103108908 | 169730 - 172477        | 70.8                  | 66-76               | 5.5             | 3.7                |
|               | 4  | 3   | PZE_103160673 | 211719 - 212707        | 116.2                 | 115-129             | 6.2             | 4                  |
|               | 5  | 3   | PZE_103185177 | 229665                 | 147.3                 | 146-148             | 6.3             | 4.1                |
|               | 6  | 6   | PZE_106038467 | 86549                  | 16.8                  | 9-20                | 14.9            | 8                  |
|               | 7  | 7   | PZE_107066645 | 123598 - 126465        | 58.2                  | 57-61               | 11.7            | 6.6                |
|               | 8  | 8   | PZE_108057442 | 102536 - 108663        | 52.9                  | 52-53               | 14.2            | 7.7                |
| DtSILK (d)    | 1  | 1   | PZE_101033622 | 21685                  | 38.5                  | 32-39               | 11.6            | 4.7                |
|               | 2  | 1   | PZE_101081841 | 69289 - 70518          | 66.2                  | 65-67               | 4.6             | 2.3                |
|               | 3  | 1   | PZE_101194503 | 241368 - 244469        | 129.1                 | 128-133             | 6.6             | 3                  |
|               | 4  | 2   | PZE_102148927 | 195747 - 196529        | 93.9                  | 93-96               | 9.1             | 3.8                |
|               | 5  | 3   | PZE_103110415 | 170772 - 174828        | 72                    | 65-72               | 15.9            | 6.1                |
|               | 6  | 3   | PZE_103147207 | 201536 - 202769        | 103.4                 | 101-110             | 5.5             | 2.6                |
|               | 7  | 6   | PZE_106095147 | 150309                 | 72.4                  | 70-74               | 13              | 5.1                |
|               | 8  | 7   | PZE_107072681 | 129265                 | 63.2                  | 43-67               | 8.4             | 3.6                |
|               | 9  | 8   | PZE_108057885 | 103311                 | 50.4                  | 50-54               | 26.4            | 9.6                |
|               | 10 | 9   | PZE_109020361 | 18684 - 20598          | 42.9                  | 38-45               | 5               | 2.5                |
|               | 11 | 10  | PZE_110057591 | 110540 - 120784        | 49.8                  | 49-52               | 7.2             | 3.2                |
| DtTAS (d)     | 1  | 1   | PZE_101033622 | 21685                  | 38.5                  | 36-39               | 10.8            | 5.4                |
|               | 2  | 2   | PZE_102157405 | 204235                 | 99.8                  | 99-100              | 6               | 3.4                |

|         |    |    |               |                 |      |         |      |      |
|---------|----|----|---------------|-----------------|------|---------|------|------|
|         | 3  | 3  | PZE_103101981 | 162179 - 167076 | 63.7 | 61-65   | 23.2 | 10.4 |
|         | 4  | 5  | PZE_105144068 | 198031          | 91.6 | 91-96   | 7.3  | 3.9  |
|         | 5  | 7  | PZE_107076807 | 132075          | 67.1 | 48-68   | 13.7 | 6.5  |
|         | 6  | 8  | PZE_108058411 | 104281 - 104625 | 53.7 | 50-55   | 19.4 | 8.8  |
|         | 7  | 9  | PZE_109092637 | 139196 - 140154 | 71.3 | 56-74   | 7.1  | 3.9  |
| PH (cm) | 1  | 1  | PZE_101018818 | 10905           | 23.7 | 21-24   | 7.5  | 3    |
|         | 2  | 1  | PZE_101133561 | 172881 - 172940 | 81.5 | 80-84   | 13.2 | 4.7  |
|         | 3  | 1  | PZE_101196829 | 245032 - 245219 | 131  | 127-133 | 17.9 | 6.1  |
|         | 4  | 3  | PZE_103110278 | 170548          | 71.8 | 69-73   | 8.1  | 3.2  |
|         | 5  | 4  | PZE_104073340 | 138154 - 144727 | 55.2 | 53-58   | 6.9  | 2.8  |
|         | 6  | 5  | PZE_105065019 | 66038 - 79496   | 59.4 | 58-60   | 7.1  | 2.9  |
|         | 7  | 6  | PZE_106040994 | 89408 - 91643   | 19.9 | 19-20   | 27.7 | 9.1  |
|         | 8  | 7  | PZE_107005418 | 3665 - 3667     | 12.3 | 2-16    | 5.1  | 2.2  |
|         | 9  | 7  | PZE_107080996 | 135892          | 71.4 | 71-72   | 17.6 | 6    |
|         | 10 | 8  | PZE_108056028 | 100939 - 102711 | 49.7 | 49-52   | 23.3 | 7.7  |
|         | 11 | 8  | PZE_108078317 | 130737 - 134065 | 68.8 | 68-69   | 14.9 | 5.2  |
|         | 12 | 9  | PZE_109025803 | 25986           | 49.1 | 48-50   | 4    | 1.9  |
|         | 13 | 9  | PZE_109086708 | 134570 - 135460 | 67.8 | 67-70   | 7.8  | 3.1  |
|         | 14 | 10 | PZE_110008028 | 6072            | 22.6 | 22-26   | 12.2 | 4.4  |
