# Supplementary material
Source: PubMed Central journal article supplement (PMC4256782)
Supplement: supp_114.169367_TableS8.pdf [file supp_114.169367_TableS8.pdf]

**Table S8 Results of the QTL detection in the dent design using the LDLA – 5 cM model.** For each detected QTL, we showed its genetic position on the dent consensus map, its confidence interval, its level of significance and the partial percentage of variance explained. We also showed the name of one of the markers located at the detected position and their range of physical position(s) on the B73 v2 genome (Gore et al. 2009).

| Trait                      | Nb | Chr | Marker        | Physical position (kb) | Genetic position (cM) | -log <sub>10</sub> (p) | R <sup>2</sup> (%) |
|----------------------------|----|-----|---------------|------------------------|-----------------------|------------------------|--------------------|
| DMC (%)                    | 1  | 1   | PZE_101028121 | 16789 - 17963          | 31.6                  | 11                     | 3.9                |
|                            | 2  | 1   | PZE_101150204 | 193868 - 194764        | 92                    | 4.9                    | 2                  |
|                            | 3  | 1   | PZE_101202934 | 249700 - 251159        | 134.9                 | 7.9                    | 3.1                |
|                            | 4  | 2   | PZE_102006385 | 3379                   | 9.6                   | 6.4                    | 1.5                |
|                            | 5  | 2   | PZE_102150016 | 196649                 | 94                    | 8.9                    | 2.9                |
|                            | 6  | 3   | PZE_103038564 | 33572 - 56014          | 46                    | 17.6                   | 6.4                |
|                            | 7  | 3   | PZE_103151042 | 204999                 | 105                   | 5.4                    | 2.3                |
|                            | 8  | 4   | PZE_104081311 | 155805                 | 59.6                  | 10.2                   | 4                  |
|                            | 9  | 5   | PZE_105047074 | 35783 - 36699          | 52.3                  | 12.4                   | 4.9                |
|                            | 10 | 6   | PZE_106007445 | 18846 - 21466          | 9.9                   | 11.7                   | 4.3                |
|                            | 11 | 6   | PZE_106096901 | 150891                 | 71.7                  | 12.7                   | 4.6                |
|                            | 12 | 7   | PZE_107040665 | 154074                 | 66.8                  | 3.6                    | 1.7                |
|                            | 13 | 8   | PZE_108057885 | 103311                 | 50.4                  | 19.1                   | 6.1                |
|                            | 14 | 9   | PZE_109089324 | 137410                 | 68.6                  | 9                      | 3.5                |
|                            | 15 | 10  | PZE_110012467 | 10879                  | 31.8                  | 7.7                    | 2.2                |
| DMY (dt.ha <sup>-1</sup> ) | 1  | 3   | PZE_103116584 | 175989                 | 78.9                  | 8                      | 3.9                |
|                            | 2  | 3   | PZE_103162977 | 213416                 | 117.8                 | 7.8                    | 4.3                |
|                            | 3  | 6   | PZE_106038467 | 86549                  | 16.8                  | 13.8                   | 8.1                |
|                            | 4  | 7   | PZE_107066645 | 123598 - 126465        | 58.2                  | 8.8                    | 5.6                |
|                            | 5  | 8   | PZE_108057442 | 102536 - 108663        | 52.9                  | 10.3                   | 5.8                |
| DtSILK (d)                 | 1  | 1   | PZE_101033622 | 21685                  | 38.5                  | 22.6                   | 7.2                |
|                            | 2  | 1   | PZE_101205734 | 251079 - 254464        | 136.4                 | 6.7                    | 2.4                |
|                            | 3  | 2   | PZE_102152020 | 198672                 | 94.5                  | 15                     | 4.5                |
|                            | 4  | 3   | PZE_103086165 | 142732 - 157202        | 61.7                  | 10                     | 3.6                |
|                            | 5  | 3   | PZE_103122617 | 180515                 | 78.6                  | 16.3                   | 4.7                |
|                            | 6  | 5   | PZE_105049624 | 41635 - 58706          | 56.3                  | 4.8                    | 2.2                |
|                            | 7  | 6   | PZE_106094705 | 149930                 | 71                    | 16.5                   | 5.4                |
|                            | 8  | 7   | PZE_107045046 | 25471 - 104886         | 43.9                  | 7.4                    | 3                  |
|                            | 9  | 7   | PZE_107107125 | 158951 - 158952        | 82.1                  | 5.8                    | 2                  |
|                            | 10 | 8   | PZE_108058411 | 104281 - 104625        | 53.7                  | 27.7                   | 8.9                |
|                            | 11 | 9   | PZE_109098496 | 143352                 | 77.3                  | 5.5                    | 2                  |
|                            | 12 | 10  | PZE_110057591 | 110540 - 120784        | 49.8                  | 8                      | 3.1                |
| DtTAS(d)                   | 1  | 1   | PZE_101032015 | 19641 - 21075          | 35.7                  | 13.2                   | 4.8                |
|                            | 2  | 2   | PZE_102159907 | 206081 - 207151        | 102.9                 | 7.1                    | 2.8                |
|                            | 3  | 3   | PZE_103098157 | 158352                 | 60.8                  | 21                     | 7.6                |

|         |    |    |               |                 |       |      |     |
|---------|----|----|---------------|-----------------|-------|------|-----|
|         | 4  | 3  | PZE_103143600 | 199245 - 201331 | 102.2 | 8    | 3.1 |
|         | 5  | 5  | PZE_105143985 | 197957 - 200116 | 95.6  | 5.1  | 2   |
|         | 6  | 6  | PZE_106033981 | 79499 - 86347   | 16    | 6.1  | 2.7 |
|         | 7  | 6  | PZE_106092387 | 148530 - 150461 | 72    | 6    | 2.5 |
|         | 8  | 7  | PZE_107045046 | 25471 - 104886  | 43.9  | 7.6  | 3.4 |
|         | 9  | 7  | PZE_107099124 | 152685 - 155704 | 79.9  | 6.1  | 2.7 |
|         | 10 | 8  | PZE_108062375 | 111291          | 54.3  | 23.6 | 8.3 |
|         | 11 | 9  | PZE_109094832 | 141175          | 73.4  | 11.1 | 3.9 |
| PH (cm) | 1  | 1  | PZE_101018868 | 10962           | 21.4  | 5.5  | 2.1 |
|         | 2  | 1  | PZE_101133356 | 172811          | 81.4  | 12.9 | 4.4 |
|         | 3  | 1  | PZE_101196829 | 245032 - 245219 | 131   | 17.9 | 6.1 |
|         | 4  | 3  | PZE_103111112 | 171438 - 175550 | 75.5  | 10.8 | 3.9 |
|         | 5  | 4  | PZE_104073340 | 138154 - 144727 | 55.2  | 4.9  | 2   |
|         | 6  | 4  | PZE_104136077 | 202589 - 227111 | 109.7 | 7.4  | 2.6 |
|         | 7  | 5  | PZE_105068432 | 70082 - 86033   | 60.4  | 6.1  | 2.7 |
|         | 8  | 6  | PZE_106040975 | 89403 - 89404   | 19.3  | 28.4 | 9.3 |
|         | 9  | 7  | PZE_107076796 | 132076          | 65.4  | 19   | 6.3 |
|         | 10 | 8  | PZE_108056028 | 100939 - 102711 | 49.7  | 25.7 | 8.2 |
|         | 11 | 8  | PZE_108079422 | 133563 - 138524 | 71.4  | 11.7 | 4.1 |
|         | 12 | 9  | PZE_109085253 | 133933          | 68.1  | 21.3 | 7.2 |
|         | 13 | 10 | PZE_110014332 | 11179 - 13553   | 33.8  | 11   | 3.3 |
