# Supplementary material
Source: PubMed Central journal article supplement (PMC4256782)
Supplement: supp_114.169367_TableS9.pdf [file supp_114.169367_TableS9.pdf]

**Table S9 Results of the QTL detection in the dent design using the LDLA – 2 cM model.** For each detected QTL, we showed its genetic position on the dent consensus map, its confidence interval, its level of significance and the partial percentage of variance explained. We also showed the name of one of the markers located at the detected position and their range of physical position(s) on the B73 v2 genome (Gore et al. 2009).

| Trait                      | Nb | Chr | Marker        | Physical position (kb) | Genetic position (cM) | -log <sub>10</sub> (p) | R <sup>2</sup> (%) |
|----------------------------|----|-----|---------------|------------------------|-----------------------|------------------------|--------------------|
| DMC (%)                    | 1  | 1   | PZE_101036345 | 23712                  | 38                    | 12.4                   | 4                  |
|                            | 2  | 1   | PZE_101154088 | 194939 - 197272        | 93.9                  | 6.2                    | 2.3                |
|                            | 3  | 1   | PZE_101203104 | 250888                 | 131.9                 | 7.1                    | 2.8                |
|                            | 4  | 2   | PZE_102002360 | 1724                   | 4.7                   | 8.5                    | 2                  |
|                            | 5  | 2   | PZE_102017964 | 8279                   | 23.4                  | 7.7                    | 2.2                |
|                            | 6  | 2   | PZE_102152020 | 198672                 | 94.5                  | 8.5                    | 3                  |
|                            | 7  | 3   | PZE_103093079 | 154090 - 160936        | 63.9                  | 16.7                   | 5.4                |
|                            | 8  | 3   | PZE_103148259 | 202185                 | 104.1                 | 5.4                    | 2                  |
|                            | 9  | 4   | PZE_104076988 | 151510 - 151684        | 56.9                  | 10.3                   | 3.5                |
|                            | 10 | 5   | PZE_105047074 | 35783 - 36699          | 52.3                  | 13.3                   | 4.9                |
|                            | 11 | 6   | PZE_106020123 | 14400 - 24611          | 10                    | 14.3                   | 4.4                |
|                            | 12 | 6   | PZE_106097959 | 151785                 | 73.1                  | 14.1                   | 4.3                |
|                            | 13 | 7   | PZE_107045895 | 24563 - 103626         | 43.6                  | 5.8                    | 2.4                |
|                            | 14 | 8   | PZE_108061901 | 110744 - 115294        | 57.2                  | 19.7                   | 6.4                |
|                            | 15 | 9   | PZE_109091148 | 138616 - 138617        | 69.6                  | 12.7                   | 4.2                |
|                            | 16 | 10  | PZE_110012769 | 11241                  | 33                    | 8.2                    | 2.2                |
| DMY (dt.ha <sup>-1</sup> ) | 1  | 1   | PZE_101183895 | 228556                 | 119.6                 | 4.8                    | 2.3                |
|                            | 2  | 3   | PZE_103113115 | 172857 - 178134        | 78.3                  | 8.4                    | 4                  |
|                            | 3  | 3   | PZE_103159262 | 210755 - 210760        | 114.6                 | 7.8                    | 3.7                |
|                            | 4  | 6   | PZE_106032535 | 75517 - 86627          | 15.5                  | 13.3                   | 6.9                |
|                            | 5  | 7   | PZE_107069530 | 126351                 | 58.1                  | 9.3                    | 5                  |
|                            | 6  | 8   | PZE_108057745 | 103023 - 103457        | 53                    | 10.5                   | 5.8                |
| DtSILK (d)                 | 1  | 1   | PZE_101035008 | 19696 - 22646          | 37.8                  | 22                     | 6.9                |
|                            | 2  | 1   | PZE_101205734 | 251079 - 254464        | 136.4                 | 7.4                    | 2.2                |
|                            | 3  | 2   | PZE_102151348 | 197954                 | 94.7                  | 12.9                   | 4.1                |
|                            | 4  | 3   | PZE_103086165 | 142732 - 157202        | 61.7                  | 10.2                   | 3.7                |
|                            | 5  | 3   | PZE_103122617 | 180515                 | 78.6                  | 16.3                   | 4.7                |
|                            | 6  | 5   | PZE_105049624 | 41635 - 58706          | 56.3                  | 4.9                    | 2.3                |
|                            | 7  | 6   | PZE_106095370 | 150525 - 150588        | 72.6                  | 17.5                   | 5.1                |
|                            | 8  | 7   | PZE_107045046 | 25471 - 104886         | 43.9                  | 8.7                    | 3.3                |
|                            | 9  | 7   | PZE_107106025 | 158126                 | 81.1                  | 6.1                    | 2                  |
|                            | 10 | 8   | PZE_108062521 | 111781                 | 54.6                  | 28.2                   | 8.9                |
|                            | 11 | 9   | PZE_109098632 | 143808                 | 78.5                  | 6.1                    | 2.1                |
|                            | 12 | 10  | PZE_110057591 | 110540 - 120784        | 49.8                  | 7.8                    | 3                  |
| DtTAS(d)                   | 1  | 1   | PZE_101032015 | 19641 - 21075          | 35.7                  | 12.9                   | 5                  |

|         |    |    |               |                 |       |      |     |
|---------|----|----|---------------|-----------------|-------|------|-----|
|         | 2  | 2  | PZE_102161022 | 207043          | 102.3 | 6.5  | 2.6 |
|         | 3  | 3  | PZE_103098157 | 158352          | 60.8  | 21.2 | 8.3 |
|         | 4  | 3  | PZE_103143600 | 199245 - 201331 | 102.2 | 7.8  | 3.2 |
|         | 5  | 5  | PZE_105143697 | 197846 - 200369 | 95.5  | 5    | 2.2 |
|         | 6  | 7  | PZE_107045046 | 25471 - 104886  | 43.9  | 6.1  | 2.9 |
|         | 7  | 7  | PZE_107099124 | 152685 - 155704 | 79.9  | 6    | 2.9 |
|         | 8  | 8  | PZE_108058411 | 104281 - 104625 | 53.7  | 20   | 7.6 |
|         | 9  | 9  | PZE_109090152 | 137787 - 138020 | 70.1  | 9.2  | 3.7 |
| PH (cm) | 1  | 1  | PZE_101132703 | 171230 - 178401 | 82.3  | 10.6 | 4.1 |
|         | 2  | 1  | PZE_101196829 | 245032 - 245219 | 131   | 15.9 | 6   |
|         | 3  | 3  | PZE_103119393 | 178152 - 178564 | 79.1  | 8.9  | 2.8 |
|         | 4  | 4  | PZE_104073794 | 145614          | 55.7  | 6.4  | 2.5 |
|         | 5  | 4  | PZE_104138654 | 204861 - 226068 | 109.4 | 6.2  | 2.5 |
|         | 6  | 5  | PZE_105070660 | 74660 - 145496  | 61.9  | 5.2  | 2.5 |
|         | 7  | 6  | PZE_106044620 | 93734           | 20.4  | 20.4 | 6.4 |
|         | 8  | 7  | PZE_107077092 | 132190          | 66.5  | 19.9 | 6.5 |
|         | 9  | 8  | PZE_108038271 | 26346 - 65101   | 43.6  | 22.4 | 8.1 |
|         | 10 | 8  | PZE_108081297 | 133441 - 143002 | 71.9  | 8.6  | 3.3 |
|         | 11 | 9  | PZE_109085253 | 133933          | 68.1  | 14.6 | 5.4 |
|         | 12 | 10 | PZE_110013838 | 12922           | 35.9  | 10.4 | 4.2 |
