# Supplementary material
Source: PubMed Central journal article supplement (PMC4256782)
Supplement: supp_114.169367_TableS10.pdf [file supp_114.169367_TableS10.pdf]

**Table S10 Results of the QTL detection in the dent design using the LDLA – 1-marker model.** For each detected QTL, we showed its genetic position on the dent consensus map, its confidence interval, its level of significance and the partial percentage of variance explained. We also showed the name of one of the markers located at the detected position and their range of physical position(s) on the B73 v2 genome (Gore et al. 2009).

| Trait                      | Nb | Chr | Marker        | Physical position (kb) | Genetic position (cM) | $-\log_{10}(p)$ | R <sup>2</sup> (%) |
|----------------------------|----|-----|---------------|------------------------|-----------------------|-----------------|--------------------|
| DMC (%)                    | 1  | 1   | PZE_101043094 | 29355                  | 43.3                  | 8.5             | 2.6                |
|                            | 2  | 2   | PZE_102015152 | 6459                   | 20.9                  | 15.3            | 5.1                |
|                            | 3  | 2   | PZE_102150016 | 196649                 | 94                    | 6.9             | 2.0                |
|                            | 4  | 3   | PZE_103038375 | 33073                  | 45.8                  | 14.2            | 4.7                |
|                            | 5  | 4   | PZE_104077580 | 151818                 | 57                    | 8.5             | 2.6                |
|                            | 6  | 5   | PZE_105043990 | 31444                  | 54.4                  | 9.7             | 3.0                |
|                            | 7  | 6   | PZE_106020569 | 16293                  | 9.3                   | 6.4             | 1.9                |
|                            | 8  | 6   | PZE_106092387 | 148530                 | 72                    | 6.3             | 1.8                |
|                            | 9  | 8   | PZE_108054499 | 97030                  | 50.2                  | 9.8             | 3.1                |
|                            | 10 | 8   | PZE_108104357 | 159498                 | 81.9                  | 5.6             | 1.6                |
|                            | 11 | 9   | PZE_109098884 | 143900                 | 78.9                  | 9.8             | 3.1                |
|                            | 12 | 10  | PZE_110073412 | 130077                 | 53.5                  | 8.5             | 2.6                |
| DMY (dt.ha <sup>-1</sup> ) | 1  | 3   | PZE_103115334 | 175353                 | 78.1                  | 9.0             | 3.6                |
|                            | 2  | 3   | PZE_103162977 | 213416                 | 117.8                 | 9.0             | 3.7                |
|                            | 3  | 6   | PZE_106031833 | 74460                  | 14.6                  | 14.0            | 6.0                |
|                            | 4  | 7   | PZE_107026145 | 29198                  | 41.6                  | 7.7             | 3.0                |
|                            | 5  | 8   | PZE_108054494 | 97029                  | 50.5                  | 10.4            | 4.3                |
| DtSILK (d)                 | 1  | 1   | PZE_101032230 | 19696                  | 37.8                  | 8.8             | 2.4                |
|                            | 2  | 1   | PZE_101076734 | 60701                  | 61                    | 11.4            | 3.3                |
|                            | 3  | 2   | PZE_102150016 | 196649                 | 94                    | 8.9             | 2.5                |
|                            | 4  | 3   | PZE_103104448 | 165863                 | 71.3                  | 15.7            | 4.7                |
|                            | 5  | 3   | PZE_103132614 | 188530                 | 91.1                  | 8.1             | 2.2                |
|                            | 6  | 5   | PZE_105054634 | 51432                  | 55.4                  | 6.4             | 1.7                |
|                            | 7  | 6   | PZE_106092387 | 148530                 | 72                    | 13.8            | 4.1                |
|                            | 8  | 7   | PZE_107023943 | 25471                  | 43.9                  | 13.0            | 3.8                |
|                            | 9  | 8   | PZE_108026961 | 27634                  | 45.5                  | 5.7             | 1.5                |
|                            | 10 | 8   | PZE_108063387 | 113292                 | 57.3                  | 10.1            | 2.9                |
|                            | 11 | 10  | PZE_110062675 | 117753                 | 50.1                  | 6.9             | 1.8                |
| DtTAS(d)                   | 1  | 1   | PZE_101035341 | 23055                  | 39.2                  | 13.3            | 4.6                |
|                            | 2  | 3   | PZE_103104448 | 165863                 | 71.3                  | 26.8            | 10.1               |
|                            | 3  | 6   | PZE_106092387 | 148530                 | 72                    | 5.8             | 1.8                |
|                            | 4  | 7   | PZE_107061937 | 118305                 | 50.8                  | 6.8             | 2.1                |
|                            | 5  | 7   | PZE_107100713 | 155251                 | 79.6                  | 6.7             | 2.1                |
|                            | 6  | 8   | PZE_108057325 | 102454                 | 51.5                  | 22.5            | 8.3                |
|                            | 7  | 9   | PZE_109071914 | 116752                 | 59.8                  | 7.3             | 2.3                |

---

|         |    |    |               |        |       |      |     |
|---------|----|----|---------------|--------|-------|------|-----|
| PH (cm) | 1  | 1  | PZE_101132469 | 170852 | 80.9  | 6.5  | 1.9 |
|         | 2  | 1  | PZE_101191970 | 238427 | 127.1 | 8.4  | 2.6 |
|         | 3  | 2  | PZE_102068532 | 46438  | 61.8  | 6.8  | 2.0 |
|         | 4  | 3  | PZE_103104448 | 165863 | 71.3  | 6.0  | 1.7 |
|         | 5  | 4  | PZE_104082879 | 156995 | 61.4  | 6.0  | 1.7 |
|         | 6  | 6  | PZE_106040890 | 89137  | 19.4  | 19.4 | 6.7 |
|         | 7  | 7  | PZE_107084200 | 139526 | 76.4  | 15.9 | 5.4 |
|         | 8  | 8  | PZE_108014288 | 14088  | 32    | 15.9 | 5.4 |
|         | 9  | 9  | PZE_109080822 | 128851 | 65.9  | 18.5 | 6.4 |
|         | 10 | 10 | PZE_110009551 | 7563   | 29.4  | 6.3  | 1.8 |

---
