# Supplementary material
Source: PubMed Central journal article supplement (PMC4256782)
Supplement: supp_114.169367_TableS11.pdf [file supp_114.169367_TableS11.pdf]

**Table S11 Results of the QTL detection in the joint analysis using the connected model.** For each detected QTL, we showed its genetic position on the dent-flint consensus map, its confidence interval, its level of significance and the partial percentage of variance explained. We also showed the name of one of the markers located at the detected position and their range of physical position(s) on the B73 v2 genome (Gore et al. 2009).

| Trait         | Nb | Chr | Marker        | Physical position (kb) | Genetic position (cM) | $-\log_{10}(p)$ | R <sup>2</sup> (%) |
|---------------|----|-----|---------------|------------------------|-----------------------|-----------------|--------------------|
| DMC (%)       | 1  | 1   | PZE_101032230 | 19696 - 19975          | 41.3                  | 8.5             | 2.3                |
|               | 2  | 1   | PZE_101103995 | 104611 - 113689        | 93.3                  | 5.2             | 1.7                |
|               | 3  | 1   | PZE_101202934 | 251103 - 251159        | 160.4                 | 4.5             | 1.6                |
|               | 4  | 1   | PZE_101247063 | 292581                 | 200.4                 | 4.3             | 1.5                |
|               | 5  | 2   | PZE_102012595 | 5556                   | 17.2                  | 21.4            | 4.5                |
|               | 6  | 2   | PZE_102178263 | 220854                 | 131.3                 | 6.9             | 2                  |
|               | 7  | 3   | PZE_103033638 | 26310 - 30050          | 45.4                  | 9.3             | 2.5                |
|               | 8  | 3   | PZE_103100449 | 160755                 | 65.5                  | 7.5             | 2.1                |
|               | 9  | 4   | PZE_104032843 | 40344 - 65470          | 54.6                  | 13.8            | 3.3                |
|               | 10 | 4   | PZE_104143137 | 231732                 | 130.7                 | 4.4             | 1.6                |
|               | 11 | 5   | PZE_105025123 | 12581                  | 42.6                  | 17.6            | 3.8                |
|               | 12 | 6   | PZE_106005094 | 6514                   | 6.3                   | 10.1            | 2.6                |
|               | 13 | 6   | PZE_106082658 | 139918 - 142454        | 66                    | 11.8            | 2.9                |
|               | 14 | 7   | PZE_107012564 | 9201                   | 33.9                  | 4.7             | 1.6                |
|               | 15 | 8   | PZE_108063387 | 112547 - 113298        | 63.4                  | 21.7            | 4.5                |
|               | 16 | 9   | PZE_109010670 | 11079 - 11504          | 30.8                  | 3.9             | 1.5                |
|               | 17 | 9   | PZE_109096248 | 141983                 | 82.5                  | 5.4             | 1.7                |
|               | 18 | 10  | PZE_110047687 | 89209 - 111680         | 47.7                  | 68.5            | 12.5               |
| DMY (dt.ha-1) | 1  | 1   | PZE_101145302 | 188026 - 188087        | 109.4                 | 12.2            | 3.6                |
|               | 2  | 1   | PZE_101215394 | 266047                 | 170.9                 | 10.4            | 3.2                |
|               | 3  | 2   | PZE_102013856 | 5997 - 6049            | 18.5                  | 5.2             | 2.1                |
|               | 4  | 2   | PZE_102066516 | 44332                  | 67.4                  | 7.2             | 2.6                |
|               | 5  | 3   | PZE_103010658 | 5853                   | 21.6                  | 7.6             | 2.6                |
|               | 6  | 3   | PZE_103098655 | 158895 - 161562        | 65.7                  | 9.5             | 3.1                |
|               | 7  | 3   | PZE_103162977 | 213416                 | 120.4                 | 5.3             | 2.1                |
|               | 8  | 4   | PZE_104025845 | 28986 - 32061          | 51.5                  | 13.5            | 3.9                |
|               | 9  | 5   | PZE_105103128 | 155811 - 160460        | 78                    | 8.8             | 2.9                |
|               | 10 | 6   | PZE_106037747 | 81440 - 86559          | 18.3                  | 9.9             | 3.1                |
|               | 11 | 6   | PZE_106050075 | 99944                  | 34                    | 11.4            | 3.4                |
|               | 12 | 6   | PZE_106106971 | 156749                 | 88.4                  | 9.2             | 3                  |
|               | 13 | 7   | PZE_107025551 | 28013 - 100690         | 44.8                  | 8.3             | 2.8                |
|               | 14 | 7   | PZE_107127637 | 170111 - 170248        | 119.3                 | 5.9             | 2.3                |
|               | 15 | 8   | PZE_108060398 | 107884 - 111781        | 62.1                  | 12.1            | 3.6                |
|               | 16 | 10  | PZE_110043381 | 82670 - 84599          | 43.2                  | 38.6            | 8.9                |
| DtSILK (d)    | 1  | 1   | PZE_101005770 | 4452 - 4610            | 9.4                   | 6.4             | 1.8                |

|          |    |    |               |                 |       |      |      |
|----------|----|----|---------------|-----------------|-------|------|------|
|          | 2  | 1  | PZE_101034085 | 21984 - 21992   | 42.7  | 10   | 2.3  |
|          | 3  | 1  | PZE_101105390 | 102985 - 118116 | 93.6  | 19.2 | 3.7  |
|          | 4  | 1  | PZE_101195591 | 244158 - 244596 | 155.9 | 11.2 | 2.5  |
|          | 5  | 2  | PZE_102161485 | 206123 - 207224 | 123   | 13.3 | 2.8  |
|          | 6  | 3  | PZE_103098655 | 158895 - 161562 | 65.7  | 12.7 | 2.7  |
|          | 7  | 3  | PZE_103128597 | 185274 - 187610 | 93.2  | 9.1  | 2.2  |
|          | 8  | 4  | PZE_104025181 | 29345 - 30933   | 51.8  | 22.8 | 4.2  |
|          | 9  | 5  | PZE_105050638 | 42662 - 51518   | 61.2  | 16.8 | 3.3  |
|          | 10 | 6  | PZE_106097991 | 151792          | 77.3  | 11.7 | 2.6  |
|          | 11 | 7  | PZE_107072354 | 128648 - 128709 | 68.9  | 14.8 | 3.1  |
|          | 12 | 8  | PZE_108061059 | 107884 - 109378 | 60.7  | 27.9 | 5    |
|          | 13 | 9  | PZE_109010476 | 11398           | 30.3  | 11.4 | 2.5  |
|          | 14 | 9  | PZE_109094832 | 141175          | 82.6  | 5.1  | 1.6  |
|          | 15 | 10 | PZE_110047800 | 89438 - 106051  | 47.4  | 93   | 15.2 |
| DtTAS(d) | 1  | 1  | PZE_101033489 | 21569 - 22464   | 43    | 12.1 | 2.5  |
|          | 2  | 1  | PZE_101140981 | 182104 - 184245 | 105   | 41.4 | 6.6  |
|          | 3  | 1  | PZE_101216412 | 267537 - 267568 | 171.5 | 12.3 | 2.5  |
|          | 4  | 3  | PZE_103098655 | 158895 - 161562 | 65.7  | 30.9 | 5.1  |
|          | 5  | 3  | PZE_103152007 | 205694          | 109.8 | 11.3 | 2.4  |
|          | 6  | 4  | PZE_104022348 | 23525 - 25988   | 49.6  | 25.7 | 4.4  |
|          | 7  | 5  | PZE_105059330 | 58137 - 72409   | 66    | 29.1 | 4.9  |
|          | 8  | 5  | PZE_105138874 | 193728          | 108.2 | 7.8  | 1.9  |
|          | 9  | 6  | PZE_106090469 | 147428          | 71.3  | 6.8  | 1.7  |
|          | 10 | 7  | PZE_107040665 | 66316 - 171898  | 75.4  | 13.6 | 2.7  |
|          | 11 | 7  | PZE_107130789 | 171926          | 126.3 | 6.2  | 1.6  |
|          | 12 | 8  | PZE_108018453 | 18973           | 42.2  | 11.8 | 2.4  |
|          | 13 | 8  | PZE_108070788 | 123843          | 69.2  | 20.3 | 3.6  |
|          | 14 | 9  | PZE_109020361 | 20598 - 20829   | 47.7  | 10.7 | 2.3  |
|          | 15 | 9  | PZE_109089874 | 137784          | 78    | 10.3 | 2.2  |
|          | 16 | 9  | PZE_109119196 | 153947          | 120.8 | 6.8  | 1.7  |
|          | 17 | 10 | PZE_110050293 | 94969 - 106961  | 47.5  | 77   | 12   |
| PH (cm)  | 1  | 1  | PZE_101021455 | 12363           | 29.3  | 5.1  | 1.4  |
|          | 2  | 1  | PZE_101106839 | 111278 - 150672 | 93.9  | 20.8 | 3.7  |
|          | 3  | 1  | PZE_101184213 | 229073          | 145.9 | 13.7 | 2.7  |
|          | 4  | 2  | PZE_102011812 | 5379            | 17.1  | 5.9  | 1.6  |
|          | 5  | 2  | PZE_102076989 | 59015 - 62213   | 74.2  | 20.2 | 3.6  |
|          | 6  | 2  | PZE_102169349 | 212884          | 128.1 | 9.6  | 2.1  |
|          | 7  | 3  | PZE_103017768 | 10455           | 33.7  | 8.1  | 1.9  |
|          | 8  | 3  | PZE_103132826 | 188571 - 188925 | 94.8  | 11.8 | 2.5  |
|          | 9  | 3  | PZE_103175533 | 221582 - 221583 | 135.2 | 7.1  | 1.8  |
|          | 10 | 4  | PZE_104022152 | 23948 - 24979   | 49.7  | 13.8 | 2.7  |
|          | 11 | 4  | PZE_104132688 | 215436 - 227111 | 120.7 | 9    | 2    |

|    |    |               |                 |       |      |      |
|----|----|---------------|-----------------|-------|------|------|
| 12 | 5  | PZE_105084182 | 101590 - 150275 | 73.1  | 9.6  | 2.1  |
| 13 | 5  | PZE_105152260 | 203315          | 120.3 | 7.4  | 1.8  |
| 14 | 6  | PZE_106049618 | 98629           | 30.4  | 21.2 | 3.8  |
| 15 | 7  | PZE_107072030 | 128141 - 128146 | 66.4  | 18   | 3.3  |
| 16 | 7  | PZE_107126258 | 168905          | 115.7 | 10.4 | 2.3  |
| 17 | 8  | PZE_108009237 | 9875            | 25.6  | 7.3  | 1.8  |
| 18 | 8  | PZE_108056704 | 101776 - 102656 | 57    | 8.1  | 1.9  |
| 19 | 8  | PZE_108096469 | 152593 - 153140 | 85.5  | 17.3 | 3.2  |
| 20 | 9  | PZE_109077113 | 124694 - 130885 | 70.9  | 19.7 | 3.6  |
| 21 | 10 | PZE_110047799 | 89438 - 97551   | 46.6  | 77.4 | 12.2 |

---
